# Supplementary material for: Multi-scale characterization of glaucophane from Chiavolino (Biella, Italy): implications for international regulations on elongate mineral particles
Source: Eur J Mineral. Author manuscript; Available in PMC 2021 Apr 9. (PMC8034610; doi:10.5194/ejm-33-77-2021)
Supplement: Supplement [file NIHMS1680470-supplement-Supplement.zip › ejm-33-77-2021-supplement-title-page.pdf]

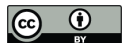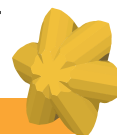

*Supplement of*

**Multi-scale characterization of glaucophane from Chiavolino (Biella, Italy):  
implications for international regulations on elongate mineral particles**

**Ruggero Vigliaturo et al.**

*Correspondence to:* Ruggero Vigliaturo ([ruggero.vigliaturo@gmail.com](mailto:ruggero.vigliaturo@gmail.com))

- [ejm-33-77-2021-supplement-title-page.pdf](#)
- [Supplementary merged dataset.xlsx](#)

The copyright of individual parts of the supplement might differ from the CC BY 4.0 License.
