# Supplementary material for: Multi-scale characterization of glaucophane from Chiavolino (Biella, Italy): implications for international regulations on elongate mineral particles
Source: Eur J Mineral. Author manuscript; Available in PMC 2021 Apr 9. (PMC8034610; doi:10.5194/ejm-33-77-2021)
Supplement: Supplement [file NIHMS1680470-supplement-Supplement.zip › Supplementary merged dataset.xlsx]

## Sheet: Histogram_HID
0.41	0	0.41	0	0.14	0	0.14	0	1.01869	0	1.01869	0	0.360312	0	0.360312	0
0.41	0.1	0.41	0.1	0.14	0.25	0.14	0.25	1.01869	0.6	1.01869	0.6	0.360312	0.18	0.360312	0.18
0.41615	0.1	1.025	0.1	0.144375	0.25	0.5775	0.25	1.03492	0.6	2.67428	0.6	0.367124	0.18	1.0551	0.18
0.41615	0	1.025	0	0.144375	0	0.5775	0	1.03492	0	2.67428	0	0.367124	0	1.0551	0
0.4223	0	1.025	0.27	0.14875	0	0.5775	0.26	1.05115	0	2.67428	0.23	0.373935	0	1.0551	0.25
0.4223	0.1	1.64	0.27	0.14875	0.25	1.015	0.26	1.05115	0.6	4.32987	0.23	0.373935	0.18	1.74989	0.25
0.42845	0.1	1.64	0	0.153125	0.25	1.015	0	1.06739	0.6	4.32987	0	0.380747	0.18	1.74989	0
0.42845	0	1.64	0.18	0.153125	0	1.015	0.2	1.06739	0	4.32987	0.09	0.380747	0	1.74989	0.21
0.4346	0	2.255	0.18	0.1575	0	1.4525	0.2	1.08362	0	5.98545	0.09	0.387558	0	2.44467	0.21
0.4346	0.1	2.255	0	0.1575	0.25	1.4525	0	1.08362	0.6	5.98545	0	0.387558	0.18	2.44467	0
0.44075	0.1	2.255	0.1	0.161875	0.25	1.4525	0.15	1.09985	0.6	5.98545	0.05	0.39437	0.18	2.44467	0.13
0.44075	0	2.87	0.1	0.161875	0	1.89	0.15	1.09985	0	7.64104	0.05	0.39437	0	3.13946	0.13
0.4469	0	2.87	0	0.16625	0	1.89	0	1.11608	0	7.64104	0	0.401182	0	3.13946	0
0.4469	0.1	2.87	0.07	0.16625	0.25	1.89	0.03	1.11608	0.6	7.64104	0.02	0.401182	0.18	3.13946	0.07
0.45305	0.1	3.485	0.07	0.170625	0.25	2.3275	0.03	1.13231	0.6	9.29663	0.02	0.407993	0.18	3.83425	0.07
0.45305	0	3.485	0	0.170625	0	2.3275	0	1.13231	0	9.29663	0	0.407993	0	3.83425	0
0.4592	0	3.485	0.07	0.175	0	2.3275	0.03	1.14854	0	9.29663	0	0.414805	0	3.83425	0.06
0.4592	0.1	4.1	0.07	0.175	0.25	2.765	0.03	1.14854	0.6	10.9522	0	0.414805	0.18	4.52904	0.06
0.46535	0.1	4.1	0	0.179375	0.25	2.765	0	1.16477	0.6	10.9522	0	0.421617	0.18	4.52904	0
0.46535	0	4.1	0.01	0.179375	0	2.765	0.02	1.16477	0	10.9522	0	0.421617	0	4.52904	0.03
0.4715	0	4.715	0.01	0.18375	0	3.2025	0.02	1.181	0	12.6078	0	0.428428	0	5.22382	0.03
0.4715	0.1	4.715	0	0.18375	0.25	3.2025	0	1.181	0.6	12.6078	0	0.428428	0.18	5.22382	0
0.47765	0.1	4.715	0.03	0.188125	0.25	3.2025	0	1.19724	0.6	12.6078	0	0.43524	0.18	5.22382	0.01
0.47765	0	5.33	0.03	0.188125	0	3.64	0	1.19724	0	14.2634	0	0.43524	0	5.91861	0.01
0.4838	0	5.33	0	0.1925	0	3.64	0	1.21347	0	14.2634	0	0.442052	0	5.91861	0
0.4838	0.1	5.33	0.05	0.1925	0.25	3.64	0.02	1.21347	0.6	14.2634	0	0.442052	0.18	5.91861	0
0.48995	0.1	5.945	0.05	0.196875	0.25	4.0775	0.02	1.2297	0.6	15.919	0	0.448863	0.18	6.6134	0
0.48995	0	5.945	0	0.196875	0	4.0775	0	1.2297	0	15.919	0	0.448863	0	6.6134	0
0.4961	0	5.945	0.03	0.20125	0	4.0775	0.02	1.24593	0	15.919	0	0.455675	0	6.6134	0
0.4961	0.1	6.56	0.03	0.20125	0.25	4.515	0.02	1.24593	0.6	17.5746	0	0.455675	0.18	7.30819	0
0.50225	0.1	6.56	0	0.205625	0.25	4.515	0	1.26216	0.6	17.5746	0	0.462487	0.18	7.30819	0
0.50225	0	6.56	0.02	0.205625	0	4.515	0	1.26216	0	17.5746	0	0.462487	0	7.30819	0.02
0.5084	0	7.175	0.02	0.21	0	4.9525	0	1.27839	0	19.2302	0	0.469298	0	8.00297	0.02
0.5084	0.1	7.175	0	0.21	0.25	4.9525	0	1.27839	0.6	19.2302	0	0.469298	0.18	8.00297	0
0.51455	0.1	7.175	0.02	0.214375	0.25	4.9525	0	1.29462	0.6	19.2302	0	0.47611	0.18	8.00297	0
0.51455	0	7.79	0.02	0.214375	0	5.39	0	1.29462	0	20.8857	0	0.47611	0	8.69776	0
0.5207	0	7.79	0	0.21875	0	5.39	0	1.31085	0	20.8857	0	0.482921	0	8.69776	0
0.5207	0.1	7.79	0.01	0.21875	0.25	5.39	0.01	1.31085	0.6	20.8857	0	0.482921	0.18	8.69776	0.03
0.52685	0.1	8.405	0.01	0.223125	0.25	5.8275	0.01	1.32709	0.6	22.5413	0	0.489733	0.18	9.39255	0.03
0.52685	0	8.405	0	0.223125	0	5.8275	0	1.32709	0	22.5413	0	0.489733	0	9.39255	0
0.533	0	8.405	0.02	0.2275	0	5.8275	0	1.34332	0	22.5413	0	0.496545	0	9.39255	0
0.533	0.1	9.02	0.02	0.2275	0.25	6.265	0	1.34332	0.6	24.1969	0	0.496545	0.18	10.0873	0
0.53915	0.1	9.02	0	0.231875	0.25	6.265	0	1.35955	0.6	24.1969	0	0.503356	0.18	10.0873	0
0.53915	0	9.02	0	0.231875	0	6.265	0	1.35955	0	24.1969	0	0.503356	0	10.0873	0
0.5453	0	9.635	0	0.23625	0	6.7025	0	1.37578	0	25.8525	0	0.510168	0	10.7821	0
0.5453	0.1	9.635	0	0.23625	0.25	6.7025	0	1.37578	0.6	25.8525	0	0.510168	0.18	10.7821	0
0.55145	0.1	9.635	0.01	0.240625	0.25	6.7025	0	1.39201	0.6	25.8525	0	0.51698	0.18	10.7821	0
0.55145	0	10.25	0.01	0.240625	0	7.14	0	1.39201	0	27.5081	0	0.51698	0	11.4769	0
0.5576	0	10.25	0	0.245	0	7.14	0	1.40824	0	27.5081	0	0.523791	0	11.4769	0
0.5576	0.1	10.25	0	0.245	0.25	7.14	0	1.40824	0.6	27.5081	0	0.523791	0.18	11.4769	0
0.56375	0.1	10.865	0	0.249375	0.25	7.5775	0	1.42447	0.6	29.1637	0	0.530603	0.18	12.1717	0
0.56375	0	10.865	0	0.249375	0	7.5775	0	1.42447	0	29.1637	0	0.530603	0	12.1717	0
0.5699	0	10.865	0	0.25375	0	7.5775	0	1.4407	0	29.1637	0	0.537415	0	12.1717	0
0.5699	0.1	11.48	0	0.25375	0.25	8.015	0	1.4407	0.6	30.8193	0	0.537415	0.18	12.8665	0
0.57605	0.1	11.48	0	0.258125	0.25	8.015	0	1.45694	0.6	30.8193	0	0.544226	0.18	12.8665	0
0.57605	0	11.48	0.01	0.258125	0	8.015	0	1.45694	0	30.8193	0	0.544226	0	12.8665	0.01
0.5822	0	12.095	0.01	0.2625	0	8.4525	0	1.47317	0	32.4748	0	0.551038	0	13.5613	0.01
0.5822	0.1	12.095	0	0.2625	0.25	8.4525	0	1.47317	0.6	32.4748	0	0.551038	0.18	13.5613	0
0.58835	0.1	12.095	0	0.266875	0.25	8.4525	0.01	1.4894	0.6	32.4748	0.01	0.55785	0.18	13.5613	0
0.58835	0	12.71	0	0.266875	0	8.89	0.01	1.4894	0	34.1304	0.01	0.55785	0	14.2561	0
0.5945	0	12.71	0	0.27125	0	8.89	0	1.50563	0	34.1304	0	0.564661	0	14.2561	0
0.5945	0.1			0.27125	0.25			1.50563	0.6			0.564661	0.18
0.60065	0.1			0.275625	0.25			1.52186	0.6			0.571473	0.18
0.60065	0			0.275625	0			1.52186	0			0.571473	0
0.6068	0			0.28	0			1.53809	0			0.578284	0
0.6068	0.1			0.28	0.25			1.53809	0.6			0.578284	0.18
0.61295	0.1			0.284375	0.25			1.55432	0.6			0.585096	0.18
0.61295	0			0.284375	0			1.55432	0			0.585096	0
0.6191	0			0.28875	0			1.57055	0			0.591908	0
0.6191	0.1			0.28875	0.25			1.57055	0.6			0.591908	0.18
0.62525	0.1			0.293125	0.25			1.58679	0.6			0.598719	0.18
0.62525	0			0.293125	0			1.58679	0			0.598719	0
0.6314	0			0.2975	0			1.60302	0			0.605531	0
0.6314	0.1			0.2975	0.25			1.60302	0.6			0.605531	0.18
0.63755	0.1			0.301875	0.25			1.61925	0.6			0.612343	0.18
0.63755	0			0.301875	0			1.61925	0			0.612343	0
0.6437	0			0.30625	0			1.63548	0			0.619154	0
0.6437	0.1			0.30625	0.25			1.63548	0.6			0.619154	0.18
0.64985	0.1			0.310625	0.25			1.65171	0.6			0.625966	0.18
0.64985	0			0.310625	0			1.65171	0			0.625966	0
0.656	0			0.315	0			1.66794	0			0.632778	0
0.656	0.1			0.315	0.25			1.66794	0.6			0.632778	0.18
0.66215	0.1			0.319375	0.25			1.68417	0.6			0.639589	0.18
0.66215	0			0.319375	0			1.68417	0			0.639589	0
0.6683	0			0.32375	0			1.7004	0			0.646401	0
0.6683	0.1			0.32375	0.25			1.7004	0.6			0.646401	0.18
0.67445	0.1			0.328125	0.25			1.71664	0.6			0.653212	0.18
0.67445	0			0.328125	0			1.71664	0			0.653212	0
0.6806	0			0.3325	0			1.73287	0			0.660024	0
0.6806	0.1			0.3325	0.25			1.73287	0.6			0.660024	0.18
0.68675	0.1			0.336875	0.25			1.7491	0.6			0.666836	0.18
0.68675	0			0.336875	0			1.7491	0			0.666836	0
0.6929	0			0.34125	0			1.76533	0			0.673647	0
0.6929	0.1			0.34125	0.25			1.76533	0.6			0.673647	0.18
0.69905	0.1			0.345625	0.25			1.78156	0.6			0.680459	0.18
0.69905	0			0.345625	0			1.78156	0			0.680459	0
0.7052	0			0.35	0			1.79779	0			0.687271	0
0.7052	0.1			0.35	0.25			1.79779	0.6			0.687271	0.18
0.71135	0.1			0.354375	0.25			1.81402	0.6			0.694082	0.18
0.71135	0			0.354375	0			1.81402	0			0.694082	0
0.7175	0			0.35875	0			1.83025	0			0.700894	0
0.7175	0.1			0.35875	0.25			1.83025	0.6			0.700894	0.18
0.72365	0.1			0.363125	0.25			1.84649	0.6			0.707706	0.18
0.72365	0			0.363125	0			1.84649	0			0.707706	0
0.7298	0			0.3675	0			1.86272	0			0.714517	0
0.7298	0.1			0.3675	0.25			1.86272	0.6			0.714517	0.18
0.73595	0.1			0.371875	0.25			1.87895	0.6			0.721329	0.18
0.73595	0			0.371875	0			1.87895	0			0.721329	0
0.7421	0			0.37625	0			1.89518	0			0.728141	0
0.7421	0.1			0.37625	0.25			1.89518	0.6			0.728141	0.18
0.74825	0.1			0.380625	0.25			1.91141	0.6			0.734952	0.18
0.74825	0			0.380625	0			1.91141	0			0.734952	0
0.7544	0			0.385	0			1.92764	0			0.741764	0
0.7544	0.1			0.385	0.25			1.92764	0.6			0.741764	0.18
0.76055	0.1			0.389375	0.25			1.94387	0.6			0.748575	0.18
0.76055	0			0.389375	0			1.94387	0			0.748575	0
0.7667	0			0.39375	0			1.9601	0			0.755387	0
0.7667	0.1			0.39375	0.25			1.9601	0.6			0.755387	0.18
0.77285	0.1			0.398125	0.25			1.97634	0.6			0.762199	0.18
0.77285	0			0.398125	0			1.97634	0			0.762199	0
0.779	0			0.4025	0			1.99257	0			0.76901	0
0.779	0.1			0.4025	0.25			1.99257	0.6			0.76901	0.18
0.78515	0.1			0.406875	0.25			2.0088	0.6			0.775822	0.18
0.78515	0			0.406875	0			2.0088	0			0.775822	0
0.7913	0			0.41125	0			2.02503	0			0.782634	0
0.7913	0.1			0.41125	0.25			2.02503	0.6			0.782634	0.18
0.79745	0.1			0.415625	0.25			2.04126	0.6			0.789445	0.18
0.79745	0			0.415625	0			2.04126	0			0.789445	0
0.8036	0			0.42	0			2.05749	0			0.796257	0
0.8036	0.1			0.42	0.25			2.05749	0.6			0.796257	0.18
0.80975	0.1			0.424375	0.25			2.07372	0.6			0.803069	0.18
0.80975	0			0.424375	0			2.07372	0			0.803069	0
0.8159	0			0.42875	0			2.08995	0			0.80988	0
0.8159	0.1			0.42875	0.25			2.08995	0.6			0.80988	0.18
0.82205	0.1			0.433125	0.25			2.10619	0.6			0.816692	0.18
0.82205	0			0.433125	0			2.10619	0			0.816692	0
0.8282	0			0.4375	0			2.12242	0			0.823504	0
0.8282	0.1			0.4375	0.25			2.12242	0.6			0.823504	0.18
0.83435	0.1			0.441875	0.25			2.13865	0.6			0.830315	0.18
0.83435	0			0.441875	0			2.13865	0			0.830315	0
0.8405	0			0.44625	0			2.15488	0			0.837127	0
0.8405	0.1			0.44625	0.25			2.15488	0.6			0.837127	0.18
0.84665	0.1			0.450625	0.25			2.17111	0.6			0.843938	0.18
0.84665	0			0.450625	0			2.17111	0			0.843938	0
0.8528	0			0.455	0			2.18734	0			0.85075	0
0.8528	0.1			0.455	0.25			2.18734	0.6			0.85075	0.18
0.85895	0.1			0.459375	0.25			2.20357	0.6			0.857562	0.18
0.85895	0			0.459375	0			2.20357	0			0.857562	0
0.8651	0			0.46375	0			2.2198	0			0.864373	0
0.8651	0.1			0.46375	0.25			2.2198	0.6			0.864373	0.18
0.87125	0.1			0.468125	0.25			2.23604	0.6			0.871185	0.18
0.87125	0			0.468125	0			2.23604	0			0.871185	0
0.8774	0			0.4725	0			2.25227	0			0.877997	0
0.8774	0.1			0.4725	0.25			2.25227	0.6			0.877997	0.18
0.88355	0.1			0.476875	0.25			2.2685	0.6			0.884808	0.18
0.88355	0			0.476875	0			2.2685	0			0.884808	0
0.8897	0			0.48125	0			2.28473	0			0.89162	0
0.8897	0.1			0.48125	0.25			2.28473	0.6			0.89162	0.18
0.89585	0.1			0.485625	0.25			2.30096	0.6			0.898432	0.18
0.89585	0			0.485625	0			2.30096	0			0.898432	0
0.902	0			0.49	0			2.31719	0			0.905243	0
0.902	0.1			0.49	0.25			2.31719	0.6			0.905243	0.18
0.90815	0.1			0.494375	0.25			2.33342	0.6			0.912055	0.18
0.90815	0			0.494375	0			2.33342	0			0.912055	0
0.9143	0			0.49875	0			2.34965	0			0.918867	0
0.9143	0.1			0.49875	0.25			2.34965	0.6			0.918867	0.18
0.92045	0.1			0.503125	0.25			2.36589	0.6			0.925678	0.18
0.92045	0			0.503125	0			2.36589	0			0.925678	0
0.9266	0			0.5075	0			2.38212	0			0.93249	0
0.9266	0.1			0.5075	0.25			2.38212	0.6			0.93249	0.18
0.93275	0.1			0.511875	0.25			2.39835	0.6			0.939301	0.18
0.93275	0			0.511875	0			2.39835	0			0.939301	0
0.9389	0			0.51625	0			2.41458	0			0.946113	0
0.9389	0.1			0.51625	0.25			2.41458	0.6			0.946113	0.18
0.94505	0.1			0.520625	0.25			2.43081	0.6			0.952925	0.18
0.94505	0			0.520625	0			2.43081	0			0.952925	0
0.9512	0			0.525	0			2.44704	0			0.959736	0
0.9512	0.1			0.525	0.25			2.44704	0.6			0.959736	0.18
0.95735	0.1			0.529375	0.25			2.46327	0.6			0.966548	0.18
0.95735	0			0.529375	0			2.46327	0			0.966548	0
0.9635	0			0.53375	0			2.4795	0			0.97336	0
0.9635	0.1			0.53375	0.25			2.4795	0.6			0.97336	0.18
0.96965	0.1			0.538125	0.25			2.49574	0.6			0.980171	0.18
0.96965	0			0.538125	0			2.49574	0			0.980171	0
0.9758	0			0.5425	0			2.51197	0			0.986983	0
0.9758	0.1			0.5425	0.25			2.51197	0.6			0.986983	0.18
0.98195	0.1			0.546875	0.25			2.5282	0.6			0.993795	0.18
0.98195	0			0.546875	0			2.5282	0			0.993795	0
0.9881	0			0.55125	0			2.54443	0			1.00061	0
0.9881	0.1			0.55125	0.25			2.54443	0.6			1.00061	0.18
0.99425	0.1			0.555625	0.25			2.56066	0.6			1.00742	0.18
0.99425	0			0.555625	0			2.56066	0			1.00742	0
1.0004	0			0.56	0			2.57689	0			1.01423	0
1.0004	0.1			0.56	0.25			2.57689	0.6			1.01423	0.18
1.00655	0.1			0.564375	0.25			2.59312	0.6			1.02104	0.18
1.00655	0			0.564375	0			2.59312	0			1.02104	0
1.0127	0			0.56875	0			2.60935	0			1.02785	0
1.0127	0.1			0.56875	0.25			2.60935	0.6			1.02785	0.18
1.01885	0.1			0.573125	0.25			2.62559	0.6			1.03466	0.18
1.01885	0			0.573125	0			2.62559	0			1.03466	0
1.025	0			0.5775	0			2.64182	0			1.04148	0
1.025	0.27			0.5775	0.26			2.64182	0.6			1.04148	0.18
1.03115	0.27			0.581789	0.26			2.65805	0.6			1.04829	0.18
1.03115	0			0.581789	0			2.65805	0			1.04829	0
1.0373	0			0.586078	0			2.67428	0			1.0551	0
1.0373	0.27			0.586078	0.26			2.67428	0.23			1.0551	0.25
1.04345	0.27			0.590368	0.26			2.69083	0.23			1.06205	0.25
1.04345	0			0.590368	0			2.69083	0			1.06205	0
1.0496	0			0.594657	0			2.70739	0			1.069	0
1.0496	0.27			0.594657	0.26			2.70739	0.23			1.069	0.25
1.05575	0.27			0.598946	0.26			2.72395	0.23			1.07594	0.25
1.05575	0			0.598946	0			2.72395	0			1.07594	0
1.0619	0			0.603235	0			2.7405	0			1.08289	0
1.0619	0.27			0.603235	0.26			2.7405	0.23			1.08289	0.25
1.06805	0.27			0.607525	0.26			2.75706	0.23			1.08984	0.25
1.06805	0			0.607525	0			2.75706	0			1.08984	0
1.0742	0			0.611814	0			2.77361	0			1.09679	0
1.0742	0.27			0.611814	0.26			2.77361	0.23			1.09679	0.25
1.08035	0.27			0.616103	0.26			2.79017	0.23			1.10373	0.25
1.08035	0			0.616103	0			2.79017	0			1.10373	0
1.0865	0			0.620392	0			2.80673	0			1.11068	0
1.0865	0.27			0.620392	0.26			2.80673	0.23			1.11068	0.25
1.09265	0.27			0.624681	0.26			2.82328	0.23			1.11763	0.25
1.09265	0			0.624681	0			2.82328	0			1.11763	0
1.0988	0			0.628971	0			2.83984	0			1.12458	0
1.0988	0.27			0.628971	0.26			2.83984	0.23			1.12458	0.25
1.10495	0.27			0.63326	0.26			2.85639	0.23			1.13153	0.25
1.10495	0			0.63326	0			2.85639	0			1.13153	0
1.1111	0			0.637549	0			2.87295	0			1.13847	0
1.1111	0.27			0.637549	0.26			2.87295	0.23			1.13847	0.25
1.11725	0.27			0.641838	0.26			2.88951	0.23			1.14542	0.25
1.11725	0			0.641838	0			2.88951	0			1.14542	0
1.1234	0			0.646127	0			2.90606	0			1.15237	0
1.1234	0.27			0.646127	0.26			2.90606	0.23			1.15237	0.25
1.12955	0.27			0.650417	0.26			2.92262	0.23			1.15932	0.25
1.12955	0			0.650417	0			2.92262	0			1.15932	0
1.1357	0			0.654706	0			2.93917	0			1.16627	0
1.1357	0.27			0.654706	0.26			2.93917	0.23			1.16627	0.25
1.14185	0.27			0.658995	0.26			2.95573	0.23			1.17321	0.25
1.14185	0			0.658995	0			2.95573	0			1.17321	0
1.148	0			0.663284	0			2.97228	0			1.18016	0
1.148	0.27			0.663284	0.26			2.97228	0.23			1.18016	0.25
1.15415	0.27			0.667574	0.26			2.98884	0.23			1.18711	0.25
1.15415	0			0.667574	0			2.98884	0			1.18711	0
1.1603	0			0.671863	0			3.0054	0			1.19406	0
1.1603	0.27			0.671863	0.26			3.0054	0.23			1.19406	0.25
1.16645	0.27			0.676152	0.26			3.02195	0.23			1.201	0.25
1.16645	0			0.676152	0			3.02195	0			1.201	0
1.1726	0			0.680441	0			3.03851	0			1.20795	0
1.1726	0.27			0.680441	0.26			3.03851	0.23			1.20795	0.25
1.17875	0.27			0.68473	0.26			3.05506	0.23			1.2149	0.25
1.17875	0			0.68473	0			3.05506	0			1.2149	0
1.1849	0			0.68902	0			3.07162	0			1.22185	0
1.1849	0.27			0.68902	0.26			3.07162	0.23			1.22185	0.25
1.19105	0.27			0.693309	0.26			3.08818	0.23			1.2288	0.25
1.19105	0			0.693309	0			3.08818	0			1.2288	0
1.1972	0			0.697598	0			3.10473	0			1.23574	0
1.1972	0.27			0.697598	0.26			3.10473	0.23			1.23574	0.25
1.20335	0.27			0.701887	0.26			3.12129	0.23			1.24269	0.25
1.20335	0			0.701887	0			3.12129	0			1.24269	0
1.2095	0			0.706176	0			3.13784	0			1.24964	0
1.2095	0.27			0.706176	0.26			3.13784	0.23			1.24964	0.25
1.21565	0.27			0.710466	0.26			3.1544	0.23			1.25659	0.25
1.21565	0			0.710466	0			3.1544	0			1.25659	0
1.2218	0			0.714755	0			3.17095	0			1.26354	0
1.2218	0.27			0.714755	0.26			3.17095	0.23			1.26354	0.25
1.22795	0.27			0.719044	0.26			3.18751	0.23			1.27048	0.25
1.22795	0			0.719044	0			3.18751	0			1.27048	0
1.2341	0			0.723333	0			3.20407	0			1.27743	0
1.2341	0.27			0.723333	0.26			3.20407	0.23			1.27743	0.25
1.24025	0.27			0.727623	0.26			3.22062	0.23			1.28438	0.25
1.24025	0			0.727623	0			3.22062	0			1.28438	0
1.2464	0			0.731912	0			3.23718	0			1.29133	0
1.2464	0.27			0.731912	0.26			3.23718	0.23			1.29133	0.25
1.25255	0.27			0.736201	0.26			3.25373	0.23			1.29828	0.25
1.25255	0			0.736201	0			3.25373	0			1.29828	0
1.2587	0			0.74049	0			3.27029	0			1.30522	0
1.2587	0.27			0.74049	0.26			3.27029	0.23			1.30522	0.25
1.26485	0.27			0.744779	0.26			3.28685	0.23			1.31217	0.25
1.26485	0			0.744779	0			3.28685	0			1.31217	0
1.271	0			0.749069	0			3.3034	0			1.31912	0
1.271	0.27			0.749069	0.26			3.3034	0.23			1.31912	0.25
1.27715	0.27			0.753358	0.26			3.31996	0.23			1.32607	0.25
1.27715	0			0.753358	0			3.31996	0			1.32607	0
1.2833	0			0.757647	0			3.33651	0			1.33301	0
1.2833	0.27			0.757647	0.26			3.33651	0.23			1.33301	0.25
1.28945	0.27			0.761936	0.26			3.35307	0.23			1.33996	0.25
1.28945	0			0.761936	0			3.35307	0			1.33996	0
1.2956	0			0.766225	0			3.36963	0			1.34691	0
1.2956	0.27			0.766225	0.26			3.36963	0.23			1.34691	0.25
1.30175	0.27			0.770515	0.26			3.38618	0.23			1.35386	0.25
1.30175	0			0.770515	0			3.38618	0			1.35386	0
1.3079	0			0.774804	0			3.40274	0			1.36081	0
1.3079	0.27			0.774804	0.26			3.40274	0.23			1.36081	0.25
1.31405	0.27			0.779093	0.26			3.41929	0.23			1.36775	0.25
1.31405	0			0.779093	0			3.41929	0			1.36775	0
1.3202	0			0.783382	0			3.43585	0			1.3747	0
1.3202	0.27			0.783382	0.26			3.43585	0.23			1.3747	0.25
1.32635	0.27			0.787672	0.26			3.4524	0.23			1.38165	0.25
1.32635	0			0.787672	0			3.4524	0			1.38165	0
1.3325	0			0.791961	0			3.46896	0			1.3886	0
1.3325	0.27			0.791961	0.26			3.46896	0.23			1.3886	0.25
1.33865	0.27			0.79625	0.26			3.48552	0.23			1.39555	0.25
1.33865	0			0.79625	0			3.48552	0			1.39555	0
1.3448	0			0.800539	0			3.50207	0			1.40249	0
1.3448	0.27			0.800539	0.26			3.50207	0.23			1.40249	0.25
1.35095	0.27			0.804828	0.26			3.51863	0.23			1.40944	0.25
1.35095	0			0.804828	0			3.51863	0			1.40944	0
1.3571	0			0.809118	0			3.53518	0			1.41639	0
1.3571	0.27			0.809118	0.26			3.53518	0.23			1.41639	0.25
1.36325	0.27			0.813407	0.26			3.55174	0.23			1.42334	0.25
1.36325	0			0.813407	0			3.55174	0			1.42334	0
1.3694	0			0.817696	0			3.5683	0			1.43028	0
1.3694	0.27			0.817696	0.26			3.5683	0.23			1.43028	0.25
1.37555	0.27			0.821985	0.26			3.58485	0.23			1.43723	0.25
1.37555	0			0.821985	0			3.58485	0			1.43723	0
1.3817	0			0.826275	0			3.60141	0			1.44418	0
1.3817	0.27			0.826275	0.26			3.60141	0.23			1.44418	0.25
1.38785	0.27			0.830564	0.26			3.61796	0.23			1.45113	0.25
1.38785	0			0.830564	0			3.61796	0			1.45113	0
1.394	0			0.834853	0			3.63452	0			1.45808	0
1.394	0.27			0.834853	0.26			3.63452	0.23			1.45808	0.25
1.40015	0.27			0.839142	0.26			3.65108	0.23			1.46502	0.25
1.40015	0			0.839142	0			3.65108	0			1.46502	0
1.4063	0			0.843431	0			3.66763	0			1.47197	0
1.4063	0.27			0.843431	0.26			3.66763	0.23			1.47197	0.25
1.41245	0.27			0.847721	0.26			3.68419	0.23			1.47892	0.25
1.41245	0			0.847721	0			3.68419	0			1.47892	0
1.4186	0			0.85201	0			3.70074	0			1.48587	0
1.4186	0.27			0.85201	0.26			3.70074	0.23			1.48587	0.25
1.42475	0.27			0.856299	0.26			3.7173	0.23			1.49282	0.25
1.42475	0			0.856299	0			3.7173	0			1.49282	0
1.4309	0			0.860588	0			3.73385	0			1.49976	0
1.4309	0.27			0.860588	0.26			3.73385	0.23			1.49976	0.25
1.43705	0.27			0.864877	0.26			3.75041	0.23			1.50671	0.25
1.43705	0			0.864877	0			3.75041	0			1.50671	0
1.4432	0			0.869167	0			3.76697	0			1.51366	0
1.4432	0.27			0.869167	0.26			3.76697	0.23			1.51366	0.25
1.44935	0.27			0.873456	0.26			3.78352	0.23			1.52061	0.25
1.44935	0			0.873456	0			3.78352	0			1.52061	0
1.4555	0			0.877745	0			3.80008	0			1.52755	0
1.4555	0.27			0.877745	0.26			3.80008	0.23			1.52755	0.25
1.46165	0.27			0.882034	0.26			3.81663	0.23			1.5345	0.25
1.46165	0			0.882034	0			3.81663	0			1.5345	0
1.4678	0			0.886324	0			3.83319	0			1.54145	0
1.4678	0.27			0.886324	0.26			3.83319	0.23			1.54145	0.25
1.47395	0.27			0.890613	0.26			3.84975	0.23			1.5484	0.25
1.47395	0			0.890613	0			3.84975	0			1.5484	0
1.4801	0			0.894902	0			3.8663	0			1.55535	0
1.4801	0.27			0.894902	0.26			3.8663	0.23			1.55535	0.25
1.48625	0.27			0.899191	0.26			3.88286	0.23			1.56229	0.25
1.48625	0			0.899191	0			3.88286	0			1.56229	0
1.4924	0			0.90348	0			3.89941	0			1.56924	0
1.4924	0.27			0.90348	0.26			3.89941	0.23			1.56924	0.25
1.49855	0.27			0.90777	0.26			3.91597	0.23			1.57619	0.25
1.49855	0			0.90777	0			3.91597	0			1.57619	0
1.5047	0			0.912059	0			3.93252	0			1.58314	0
1.5047	0.27			0.912059	0.26			3.93252	0.23			1.58314	0.25
1.51085	0.27			0.916348	0.26			3.94908	0.23			1.59009	0.25
1.51085	0			0.916348	0			3.94908	0			1.59009	0
1.517	0			0.920637	0			3.96564	0			1.59703	0
1.517	0.27			0.920637	0.26			3.96564	0.23			1.59703	0.25
1.52315	0.27			0.924926	0.26			3.98219	0.23			1.60398	0.25
1.52315	0			0.924926	0			3.98219	0			1.60398	0
1.5293	0			0.929216	0			3.99875	0			1.61093	0
1.5293	0.27			0.929216	0.26			3.99875	0.23			1.61093	0.25
1.53545	0.27			0.933505	0.26			4.0153	0.23			1.61788	0.25
1.53545	0			0.933505	0			4.0153	0			1.61788	0
1.5416	0			0.937794	0			4.03186	0			1.62483	0
1.5416	0.27			0.937794	0.26			4.03186	0.23			1.62483	0.25
1.54775	0.27			0.942083	0.26			4.04842	0.23			1.63177	0.25
1.54775	0			0.942083	0			4.04842	0			1.63177	0
1.5539	0			0.946373	0			4.06497	0			1.63872	0
1.5539	0.27			0.946373	0.26			4.06497	0.23			1.63872	0.25
1.56005	0.27			0.950662	0.26			4.08153	0.23			1.64567	0.25
1.56005	0			0.950662	0			4.08153	0			1.64567	0
1.5662	0			0.954951	0			4.09808	0			1.65262	0
1.5662	0.27			0.954951	0.26			4.09808	0.23			1.65262	0.25
1.57235	0.27			0.95924	0.26			4.11464	0.23			1.65956	0.25
1.57235	0			0.95924	0			4.11464	0			1.65956	0
1.5785	0			0.963529	0			4.1312	0			1.66651	0
1.5785	0.27			0.963529	0.26			4.1312	0.23			1.66651	0.25
1.58465	0.27			0.967819	0.26			4.14775	0.23			1.67346	0.25
1.58465	0			0.967819	0			4.14775	0			1.67346	0
1.5908	0			0.972108	0			4.16431	0			1.68041	0
1.5908	0.27			0.972108	0.26			4.16431	0.23			1.68041	0.25
1.59695	0.27			0.976397	0.26			4.18086	0.23			1.68736	0.25
1.59695	0			0.976397	0			4.18086	0			1.68736	0
1.6031	0			0.980686	0			4.19742	0			1.6943	0
1.6031	0.27			0.980686	0.26			4.19742	0.23			1.6943	0.25
1.60925	0.27			0.984975	0.26			4.21397	0.23			1.70125	0.25
1.60925	0			0.984975	0			4.21397	0			1.70125	0
1.6154	0			0.989265	0			4.23053	0			1.7082	0
1.6154	0.27			0.989265	0.26			4.23053	0.23			1.7082	0.25
1.62155	0.27			0.993554	0.26			4.24709	0.23			1.71515	0.25
1.62155	0			0.993554	0			4.24709	0			1.71515	0
1.6277	0			0.997843	0			4.26364	0			1.7221	0
1.6277	0.27			0.997843	0.26			4.26364	0.23			1.7221	0.25
1.63385	0.27			1.00213	0.26			4.2802	0.23			1.72904	0.25
1.63385	0			1.00213	0			4.2802	0			1.72904	0
1.64	0			1.00642	0			4.29675	0			1.73599	0
1.64	0.18			1.00642	0.26			4.29675	0.23			1.73599	0.25
1.64615	0.18			1.01071	0.26			4.31331	0.23			1.74294	0.25
1.64615	0			1.01071	0			4.31331	0			1.74294	0
1.6523	0			1.015	0			4.32987	0			1.74989	0
1.6523	0.18			1.015	0.2			4.32987	0.09			1.74989	0.21
1.65845	0.18			1.01937	0.2			4.3461	0.09			1.75683	0.21
1.65845	0			1.01937	0			4.3461	0			1.75683	0
1.6646	0			1.02375	0			4.36233	0			1.76378	0
1.6646	0.18			1.02375	0.2			4.36233	0.09			1.76378	0.21
1.67075	0.18			1.02812	0.2			4.37856	0.09			1.77073	0.21
1.67075	0			1.02812	0			4.37856	0			1.77073	0
1.6769	0			1.0325	0			4.39479	0			1.77768	0
1.6769	0.18			1.0325	0.2			4.39479	0.09			1.77768	0.21
1.68305	0.18			1.03687	0.2			4.41102	0.09			1.78463	0.21
1.68305	0			1.03687	0			4.41102	0			1.78463	0
1.6892	0			1.04125	0			4.42725	0			1.79157	0
1.6892	0.18			1.04125	0.2			4.42725	0.09			1.79157	0.21
1.69535	0.18			1.04562	0.2			4.44348	0.09			1.79852	0.21
1.69535	0			1.04562	0			4.44348	0			1.79852	0
1.7015	0			1.05	0			4.45972	0			1.80547	0
1.7015	0.18			1.05	0.2			4.45972	0.09			1.80547	0.21
1.70765	0.18			1.05437	0.2			4.47595	0.09			1.81242	0.21
1.70765	0			1.05437	0			4.47595	0			1.81242	0
1.7138	0			1.05875	0			4.49218	0			1.81937	0
1.7138	0.18			1.05875	0.2			4.49218	0.09			1.81937	0.21
1.71995	0.18			1.06312	0.2			4.50841	0.09			1.82631	0.21
1.71995	0			1.06312	0			4.50841	0			1.82631	0
1.7261	0			1.0675	0			4.52464	0			1.83326	0
1.7261	0.18			1.0675	0.2			4.52464	0.09			1.83326	0.21
1.73225	0.18			1.07187	0.2			4.54087	0.09			1.84021	0.21
1.73225	0			1.07187	0			4.54087	0			1.84021	0
1.7384	0			1.07625	0			4.5571	0			1.84716	0
1.7384	0.18			1.07625	0.2			4.5571	0.09			1.84716	0.21
1.74455	0.18			1.08062	0.2			4.57333	0.09			1.85411	0.21
1.74455	0			1.08062	0			4.57333	0			1.85411	0
1.7507	0			1.085	0			4.58957	0			1.86105	0
1.7507	0.18			1.085	0.2			4.58957	0.09			1.86105	0.21
1.75685	0.18			1.08937	0.2			4.6058	0.09			1.868	0.21
1.75685	0			1.08937	0			4.6058	0			1.868	0
1.763	0			1.09375	0			4.62203	0			1.87495	0
1.763	0.18			1.09375	0.2			4.62203	0.09			1.87495	0.21
1.76915	0.18			1.09812	0.2			4.63826	0.09			1.8819	0.21
1.76915	0			1.09812	0			4.63826	0			1.8819	0
1.7753	0			1.1025	0			4.65449	0			1.88884	0
1.7753	0.18			1.1025	0.2			4.65449	0.09			1.88884	0.21
1.78145	0.18			1.10687	0.2			4.67072	0.09			1.89579	0.21
1.78145	0			1.10687	0			4.67072	0			1.89579	0
1.7876	0			1.11125	0			4.68695	0			1.90274	0
1.7876	0.18			1.11125	0.2			4.68695	0.09			1.90274	0.21
1.79375	0.18			1.11562	0.2			4.70318	0.09			1.90969	0.21
1.79375	0			1.11562	0			4.70318	0			1.90969	0
1.7999	0			1.12	0			4.71942	0			1.91664	0
1.7999	0.18			1.12	0.2			4.71942	0.09			1.91664	0.21
1.80605	0.18			1.12437	0.2			4.73565	0.09			1.92358	0.21
1.80605	0			1.12437	0			4.73565	0			1.92358	0
1.8122	0			1.12875	0			4.75188	0			1.93053	0
1.8122	0.18			1.12875	0.2			4.75188	0.09			1.93053	0.21
1.81835	0.18			1.13312	0.2			4.76811	0.09			1.93748	0.21
1.81835	0			1.13312	0			4.76811	0			1.93748	0
1.8245	0			1.1375	0			4.78434	0			1.94443	0
1.8245	0.18			1.1375	0.2			4.78434	0.09			1.94443	0.21
1.83065	0.18			1.14187	0.2			4.80057	0.09			1.95138	0.21
1.83065	0			1.14187	0			4.80057	0			1.95138	0
1.8368	0			1.14625	0			4.8168	0			1.95832	0
1.8368	0.18			1.14625	0.2			4.8168	0.09			1.95832	0.21
1.84295	0.18			1.15062	0.2			4.83303	0.09			1.96527	0.21
1.84295	0			1.15062	0			4.83303	0			1.96527	0
1.8491	0			1.155	0			4.84927	0			1.97222	0
1.8491	0.18			1.155	0.2			4.84927	0.09			1.97222	0.21
1.85525	0.18			1.15937	0.2			4.8655	0.09			1.97917	0.21
1.85525	0			1.15937	0			4.8655	0			1.97917	0
1.8614	0			1.16375	0			4.88173	0			1.98611	0
1.8614	0.18			1.16375	0.2			4.88173	0.09			1.98611	0.21
1.86755	0.18			1.16812	0.2			4.89796	0.09			1.99306	0.21
1.86755	0			1.16812	0			4.89796	0			1.99306	0
1.8737	0			1.1725	0			4.91419	0			2.00001	0
1.8737	0.18			1.1725	0.2			4.91419	0.09			2.00001	0.21
1.87985	0.18			1.17687	0.2			4.93042	0.09			2.00696	0.21
1.87985	0			1.17687	0			4.93042	0			2.00696	0
1.886	0			1.18125	0			4.94665	0			2.01391	0
1.886	0.18			1.18125	0.2			4.94665	0.09			2.01391	0.21
1.89215	0.18			1.18562	0.2			4.96288	0.09			2.02085	0.21
1.89215	0			1.18562	0			4.96288	0			2.02085	0
1.8983	0			1.19	0			4.97912	0			2.0278	0
1.8983	0.18			1.19	0.2			4.97912	0.09			2.0278	0.21
1.90445	0.18			1.19437	0.2			4.99535	0.09			2.03475	0.21
1.90445	0			1.19437	0			4.99535	0			2.03475	0
1.9106	0			1.19875	0			5.01158	0			2.0417	0
1.9106	0.18			1.19875	0.2			5.01158	0.09			2.0417	0.21
1.91675	0.18			1.20312	0.2			5.02781	0.09			2.04865	0.21
1.91675	0			1.20312	0			5.02781	0			2.04865	0
1.9229	0			1.2075	0			5.04404	0			2.05559	0
1.9229	0.18			1.2075	0.2			5.04404	0.09			2.05559	0.21
1.92905	0.18			1.21187	0.2			5.06027	0.09			2.06254	0.21
1.92905	0			1.21187	0			5.06027	0			2.06254	0
1.9352	0			1.21625	0			5.0765	0			2.06949	0
1.9352	0.18			1.21625	0.2			5.0765	0.09			2.06949	0.21
1.94135	0.18			1.22062	0.2			5.09273	0.09			2.07644	0.21
1.94135	0			1.22062	0			5.09273	0			2.07644	0
1.9475	0			1.225	0			5.10897	0			2.08338	0
1.9475	0.18			1.225	0.2			5.10897	0.09			2.08338	0.21
1.95365	0.18			1.22937	0.2			5.1252	0.09			2.09033	0.21
1.95365	0			1.22937	0			5.1252	0			2.09033	0
1.9598	0			1.23375	0			5.14143	0			2.09728	0
1.9598	0.18			1.23375	0.2			5.14143	0.09			2.09728	0.21
1.96595	0.18			1.23812	0.2			5.15766	0.09			2.10423	0.21
1.96595	0			1.23812	0			5.15766	0			2.10423	0
1.9721	0			1.2425	0			5.17389	0			2.11118	0
1.9721	0.18			1.2425	0.2			5.17389	0.09			2.11118	0.21
1.97825	0.18			1.24687	0.2			5.19012	0.09			2.11812	0.21
1.97825	0			1.24687	0			5.19012	0			2.11812	0
1.9844	0			1.25125	0			5.20635	0			2.12507	0
1.9844	0.18			1.25125	0.2			5.20635	0.09			2.12507	0.21
1.99055	0.18			1.25562	0.2			5.22258	0.09			2.13202	0.21
1.99055	0			1.25562	0			5.22258	0			2.13202	0
1.9967	0			1.26	0			5.23882	0			2.13897	0
1.9967	0.18			1.26	0.2			5.23882	0.09			2.13897	0.21
2.00285	0.18			1.26437	0.2			5.25505	0.09			2.14592	0.21
2.00285	0			1.26437	0			5.25505	0			2.14592	0
2.009	0			1.26875	0			5.27128	0			2.15286	0
2.009	0.18			1.26875	0.2			5.27128	0.09			2.15286	0.21
2.01515	0.18			1.27312	0.2			5.28751	0.09			2.15981	0.21
2.01515	0			1.27312	0			5.28751	0			2.15981	0
2.0213	0			1.2775	0			5.30374	0			2.16676	0
2.0213	0.18			1.2775	0.2			5.30374	0.09			2.16676	0.21
2.02745	0.18			1.28187	0.2			5.31997	0.09			2.17371	0.21
2.02745	0			1.28187	0			5.31997	0			2.17371	0
2.0336	0			1.28625	0			5.3362	0			2.18066	0
2.0336	0.18			1.28625	0.2			5.3362	0.09			2.18066	0.21
2.03975	0.18			1.29062	0.2			5.35243	0.09			2.1876	0.21
2.03975	0			1.29062	0			5.35243	0			2.1876	0
2.0459	0			1.295	0			5.36867	0			2.19455	0
2.0459	0.18			1.295	0.2			5.36867	0.09			2.19455	0.21
2.05205	0.18			1.29937	0.2			5.3849	0.09			2.2015	0.21
2.05205	0			1.29937	0			5.3849	0			2.2015	0
2.0582	0			1.30375	0			5.40113	0			2.20845	0
2.0582	0.18			1.30375	0.2			5.40113	0.09			2.20845	0.21
2.06435	0.18			1.30812	0.2			5.41736	0.09			2.21539	0.21
2.06435	0			1.30812	0			5.41736	0			2.21539	0
2.0705	0			1.3125	0			5.43359	0			2.22234	0
2.0705	0.18			1.3125	0.2			5.43359	0.09			2.22234	0.21
2.07665	0.18			1.31687	0.2			5.44982	0.09			2.22929	0.21
2.07665	0			1.31687	0			5.44982	0			2.22929	0
2.0828	0			1.32125	0			5.46605	0			2.23624	0
2.0828	0.18			1.32125	0.2			5.46605	0.09			2.23624	0.21
2.08895	0.18			1.32562	0.2			5.48228	0.09			2.24319	0.21
2.08895	0			1.32562	0			5.48228	0			2.24319	0
2.0951	0			1.33	0			5.49852	0			2.25013	0
2.0951	0.18			1.33	0.2			5.49852	0.09			2.25013	0.21
2.10125	0.18			1.33437	0.2			5.51475	0.09			2.25708	0.21
2.10125	0			1.33437	0			5.51475	0			2.25708	0
2.1074	0			1.33875	0			5.53098	0			2.26403	0
2.1074	0.18			1.33875	0.2			5.53098	0.09			2.26403	0.21
2.11355	0.18			1.34312	0.2			5.54721	0.09			2.27098	0.21
2.11355	0			1.34312	0			5.54721	0			2.27098	0
2.1197	0			1.3475	0			5.56344	0			2.27793	0
2.1197	0.18			1.3475	0.2			5.56344	0.09			2.27793	0.21
2.12585	0.18			1.35187	0.2			5.57967	0.09			2.28487	0.21
2.12585	0			1.35187	0			5.57967	0			2.28487	0
2.132	0			1.35625	0			5.5959	0			2.29182	0
2.132	0.18			1.35625	0.2			5.5959	0.09			2.29182	0.21
2.13815	0.18			1.36062	0.2			5.61213	0.09			2.29877	0.21
2.13815	0			1.36062	0			5.61213	0			2.29877	0
2.1443	0			1.365	0			5.62837	0			2.30572	0
2.1443	0.18			1.365	0.2			5.62837	0.09			2.30572	0.21
2.15045	0.18			1.36937	0.2			5.6446	0.09			2.31266	0.21
2.15045	0			1.36937	0			5.6446	0			2.31266	0
2.1566	0			1.37375	0			5.66083	0			2.31961	0
2.1566	0.18			1.37375	0.2			5.66083	0.09			2.31961	0.21
2.16275	0.18			1.37812	0.2			5.67706	0.09			2.32656	0.21
2.16275	0			1.37812	0			5.67706	0			2.32656	0
2.1689	0			1.3825	0			5.69329	0			2.33351	0
2.1689	0.18			1.3825	0.2			5.69329	0.09			2.33351	0.21
2.17505	0.18			1.38687	0.2			5.70952	0.09			2.34046	0.21
2.17505	0			1.38687	0			5.70952	0			2.34046	0
2.1812	0			1.39125	0			5.72575	0			2.3474	0
2.1812	0.18			1.39125	0.2			5.72575	0.09			2.3474	0.21
2.18735	0.18			1.39562	0.2			5.74198	0.09			2.35435	0.21
2.18735	0			1.39562	0			5.74198	0			2.35435	0
2.1935	0			1.4	0			5.75822	0			2.3613	0
2.1935	0.18			1.4	0.2			5.75822	0.09			2.3613	0.21
2.19965	0.18			1.40437	0.2			5.77445	0.09			2.36825	0.21
2.19965	0			1.40437	0			5.77445	0			2.36825	0
2.2058	0			1.40875	0			5.79068	0			2.3752	0
2.2058	0.18			1.40875	0.2			5.79068	0.09			2.3752	0.21
2.21195	0.18			1.41312	0.2			5.80691	0.09			2.38214	0.21
2.21195	0			1.41312	0			5.80691	0			2.38214	0
2.2181	0			1.4175	0			5.82314	0			2.38909	0
2.2181	0.18			1.4175	0.2			5.82314	0.09			2.38909	0.21
2.22425	0.18			1.42187	0.2			5.83937	0.09			2.39604	0.21
2.22425	0			1.42187	0			5.83937	0			2.39604	0
2.2304	0			1.42625	0			5.8556	0			2.40299	0
2.2304	0.18			1.42625	0.2			5.8556	0.09			2.40299	0.21
2.23655	0.18			1.43062	0.2			5.87183	0.09			2.40994	0.21
2.23655	0			1.43062	0			5.87183	0			2.40994	0
2.2427	0			1.435	0			5.88807	0			2.41688	0
2.2427	0.18			1.435	0.2			5.88807	0.09			2.41688	0.21
2.24885	0.18			1.43937	0.2			5.9043	0.09			2.42383	0.21
2.24885	0			1.43937	0			5.9043	0			2.42383	0
2.255	0			1.44375	0			5.92053	0			2.43078	0
2.255	0.1			1.44375	0.2			5.92053	0.09			2.43078	0.21
2.26103	0.1			1.44812	0.2			5.93676	0.09			2.43773	0.21
2.26103	0			1.44812	0			5.93676	0			2.43773	0
2.26706	0			1.4525	0			5.95299	0			2.44467	0
2.26706	0.1			1.4525	0.15			5.95299	0.09			2.44467	0.13
2.27309	0.1			1.45679	0.15			5.96922	0.09			2.45149	0.13
2.27309	0			1.45679	0			5.96922	0			2.45149	0
2.27912	0			1.46108	0			5.98545	0			2.4583	0
2.27912	0.1			1.46108	0.15			5.98545	0.05			2.4583	0.13
2.28515	0.1			1.46537	0.15			6.00168	0.05			2.46511	0.13
2.28515	0			1.46537	0			6.00168	0			2.46511	0
2.29118	0			1.46966	0			6.01792	0			2.47192	0
2.29118	0.1			1.46966	0.15			6.01792	0.05			2.47192	0.13
2.29721	0.1			1.47395	0.15			6.03415	0.05			2.47873	0.13
2.29721	0			1.47395	0			6.03415	0			2.47873	0
2.30324	0			1.47824	0			6.05038	0			2.48554	0
2.30324	0.1			1.47824	0.15			6.05038	0.05			2.48554	0.13
2.30926	0.1			1.48252	0.15			6.06661	0.05			2.49236	0.13
2.30926	0			1.48252	0			6.06661	0			2.49236	0
2.31529	0			1.48681	0			6.08284	0			2.49917	0
2.31529	0.1			1.48681	0.15			6.08284	0.05			2.49917	0.13
2.32132	0.1			1.4911	0.15			6.09907	0.05			2.50598	0.13
2.32132	0			1.4911	0			6.09907	0			2.50598	0
2.32735	0			1.49539	0			6.1153	0			2.51279	0
2.32735	0.1			1.49539	0.15			6.1153	0.05			2.51279	0.13
2.33338	0.1			1.49968	0.15			6.13153	0.05			2.5196	0.13
2.33338	0			1.49968	0			6.13153	0			2.5196	0
2.33941	0			1.50397	0			6.14777	0			2.52641	0
2.33941	0.1			1.50397	0.15			6.14777	0.05			2.52641	0.13
2.34544	0.1			1.50826	0.15			6.164	0.05			2.53323	0.13
2.34544	0			1.50826	0			6.164	0			2.53323	0
2.35147	0			1.51255	0			6.18023	0			2.54004	0
2.35147	0.1			1.51255	0.15			6.18023	0.05			2.54004	0.13
2.3575	0.1			1.51684	0.15			6.19646	0.05			2.54685	0.13
2.3575	0			1.51684	0			6.19646	0			2.54685	0
2.36353	0			1.52113	0			6.21269	0			2.55366	0
2.36353	0.1			1.52113	0.15			6.21269	0.05			2.55366	0.13
2.36956	0.1			1.52542	0.15			6.22892	0.05			2.56047	0.13
2.36956	0			1.52542	0			6.22892	0			2.56047	0
2.37559	0			1.52971	0			6.24515	0			2.56728	0
2.37559	0.1			1.52971	0.15			6.24515	0.05			2.56728	0.13
2.38162	0.1			1.534	0.15			6.26138	0.05			2.5741	0.13
2.38162	0			1.534	0			6.26138	0			2.5741	0
2.38765	0			1.53828	0			6.27762	0			2.58091	0
2.38765	0.1			1.53828	0.15			6.27762	0.05			2.58091	0.13
2.39368	0.1			1.54257	0.15			6.29385	0.05			2.58772	0.13
2.39368	0			1.54257	0			6.29385	0			2.58772	0
2.39971	0			1.54686	0			6.31008	0			2.59453	0
2.39971	0.1			1.54686	0.15			6.31008	0.05			2.59453	0.13
2.40574	0.1			1.55115	0.15			6.32631	0.05			2.60134	0.13
2.40574	0			1.55115	0			6.32631	0			2.60134	0
2.41176	0			1.55544	0			6.34254	0			2.60815	0
2.41176	0.1			1.55544	0.15			6.34254	0.05			2.60815	0.13
2.41779	0.1			1.55973	0.15			6.35877	0.05			2.61497	0.13
2.41779	0			1.55973	0			6.35877	0			2.61497	0
2.42382	0			1.56402	0			6.375	0			2.62178	0
2.42382	0.1			1.56402	0.15			6.375	0.05			2.62178	0.13
2.42985	0.1			1.56831	0.15			6.39123	0.05			2.62859	0.13
2.42985	0			1.56831	0			6.39123	0			2.62859	0
2.43588	0			1.5726	0			6.40747	0			2.6354	0
2.43588	0.1			1.5726	0.15			6.40747	0.05			2.6354	0.13
2.44191	0.1			1.57689	0.15			6.4237	0.05			2.64221	0.13
2.44191	0			1.57689	0			6.4237	0			2.64221	0
2.44794	0			1.58118	0			6.43993	0			2.64902	0
2.44794	0.1			1.58118	0.15			6.43993	0.05			2.64902	0.13
2.45397	0.1			1.58547	0.15			6.45616	0.05			2.65584	0.13
2.45397	0			1.58547	0			6.45616	0			2.65584	0
2.46	0			1.58975	0			6.47239	0			2.66265	0
2.46	0.1			1.58975	0.15			6.47239	0.05			2.66265	0.13
2.46603	0.1			1.59404	0.15			6.48862	0.05			2.66946	0.13
2.46603	0			1.59404	0			6.48862	0			2.66946	0
2.47206	0			1.59833	0			6.50485	0			2.67627	0
2.47206	0.1			1.59833	0.15			6.50485	0.05			2.67627	0.13
2.47809	0.1			1.60262	0.15			6.52108	0.05			2.68308	0.13
2.47809	0			1.60262	0			6.52108	0			2.68308	0
2.48412	0			1.60691	0			6.53732	0			2.68989	0
2.48412	0.1			1.60691	0.15			6.53732	0.05			2.68989	0.13
2.49015	0.1			1.6112	0.15			6.55355	0.05			2.69671	0.13
2.49015	0			1.6112	0			6.55355	0			2.69671	0
2.49618	0			1.61549	0			6.56978	0			2.70352	0
2.49618	0.1			1.61549	0.15			6.56978	0.05			2.70352	0.13
2.50221	0.1			1.61978	0.15			6.58601	0.05			2.71033	0.13
2.50221	0			1.61978	0			6.58601	0			2.71033	0
2.50824	0			1.62407	0			6.60224	0			2.71714	0
2.50824	0.1			1.62407	0.15			6.60224	0.05			2.71714	0.13
2.51426	0.1			1.62836	0.15			6.61847	0.05			2.72395	0.13
2.51426	0			1.62836	0			6.61847	0			2.72395	0
2.52029	0			1.63265	0			6.6347	0			2.73076	0
2.52029	0.1			1.63265	0.15			6.6347	0.05			2.73076	0.13
2.52632	0.1			1.63694	0.15			6.65093	0.05			2.73758	0.13
2.52632	0			1.63694	0			6.65093	0			2.73758	0
2.53235	0			1.64123	0			6.66717	0			2.74439	0
2.53235	0.1			1.64123	0.15			6.66717	0.05			2.74439	0.13
2.53838	0.1			1.64551	0.15			6.6834	0.05			2.7512	0.13
2.53838	0			1.64551	0			6.6834	0			2.7512	0
2.54441	0			1.6498	0			6.69963	0			2.75801	0
2.54441	0.1			1.6498	0.15			6.69963	0.05			2.75801	0.13
2.55044	0.1			1.65409	0.15			6.71586	0.05			2.76482	0.13
2.55044	0			1.65409	0			6.71586	0			2.76482	0
2.55647	0			1.65838	0			6.73209	0			2.77163	0
2.55647	0.1			1.65838	0.15			6.73209	0.05			2.77163	0.13
2.5625	0.1			1.66267	0.15			6.74832	0.05			2.77845	0.13
2.5625	0			1.66267	0			6.74832	0			2.77845	0
2.56853	0			1.66696	0			6.76455	0			2.78526	0
2.56853	0.1			1.66696	0.15			6.76455	0.05			2.78526	0.13
2.57456	0.1			1.67125	0.15			6.78078	0.05			2.79207	0.13
2.57456	0			1.67125	0			6.78078	0			2.79207	0
2.58059	0			1.67554	0			6.79702	0			2.79888	0
2.58059	0.1			1.67554	0.15			6.79702	0.05			2.79888	0.13
2.58662	0.1			1.67983	0.15			6.81325	0.05			2.80569	0.13
2.58662	0			1.67983	0			6.81325	0			2.80569	0
2.59265	0			1.68412	0			6.82948	0			2.8125	0
2.59265	0.1			1.68412	0.15			6.82948	0.05			2.8125	0.13
2.59868	0.1			1.68841	0.15			6.84571	0.05			2.81931	0.13
2.59868	0			1.68841	0			6.84571	0			2.81931	0
2.60471	0			1.6927	0			6.86194	0			2.82613	0
2.60471	0.1			1.6927	0.15			6.86194	0.05			2.82613	0.13
2.61074	0.1			1.69699	0.15			6.87817	0.05			2.83294	0.13
2.61074	0			1.69699	0			6.87817	0			2.83294	0
2.61676	0			1.70127	0			6.8944	0			2.83975	0
2.61676	0.1			1.70127	0.15			6.8944	0.05			2.83975	0.13
2.62279	0.1			1.70556	0.15			6.91063	0.05			2.84656	0.13
2.62279	0			1.70556	0			6.91063	0			2.84656	0
2.62882	0			1.70985	0			6.92687	0			2.85337	0
2.62882	0.1			1.70985	0.15			6.92687	0.05			2.85337	0.13
2.63485	0.1			1.71414	0.15			6.9431	0.05			2.86018	0.13
2.63485	0			1.71414	0			6.9431	0			2.86018	0
2.64088	0			1.71843	0			6.95933	0			2.867	0
2.64088	0.1			1.71843	0.15			6.95933	0.05			2.867	0.13
2.64691	0.1			1.72272	0.15			6.97556	0.05			2.87381	0.13
2.64691	0			1.72272	0			6.97556	0			2.87381	0
2.65294	0			1.72701	0			6.99179	0			2.88062	0
2.65294	0.1			1.72701	0.15			6.99179	0.05			2.88062	0.13
2.65897	0.1			1.7313	0.15			7.00802	0.05			2.88743	0.13
2.65897	0			1.7313	0			7.00802	0			2.88743	0
2.665	0			1.73559	0			7.02425	0			2.89424	0
2.665	0.1			1.73559	0.15			7.02425	0.05			2.89424	0.13
2.67103	0.1			1.73988	0.15			7.04048	0.05			2.90105	0.13
2.67103	0			1.73988	0			7.04048	0			2.90105	0
2.67706	0			1.74417	0			7.05672	0			2.90787	0
2.67706	0.1			1.74417	0.15			7.05672	0.05			2.90787	0.13
2.68309	0.1			1.74846	0.15			7.07295	0.05			2.91468	0.13
2.68309	0			1.74846	0			7.07295	0			2.91468	0
2.68912	0			1.75275	0			7.08918	0			2.92149	0
2.68912	0.1			1.75275	0.15			7.08918	0.05			2.92149	0.13
2.69515	0.1			1.75703	0.15			7.10541	0.05			2.9283	0.13
2.69515	0			1.75703	0			7.10541	0			2.9283	0
2.70118	0			1.76132	0			7.12164	0			2.93511	0
2.70118	0.1			1.76132	0.15			7.12164	0.05			2.93511	0.13
2.70721	0.1			1.76561	0.15			7.13787	0.05			2.94192	0.13
2.70721	0			1.76561	0			7.13787	0			2.94192	0
2.71324	0			1.7699	0			7.1541	0			2.94874	0
2.71324	0.1			1.7699	0.15			7.1541	0.05			2.94874	0.13
2.71926	0.1			1.77419	0.15			7.17033	0.05			2.95555	0.13
2.71926	0			1.77419	0			7.17033	0			2.95555	0
2.72529	0			1.77848	0			7.18657	0			2.96236	0
2.72529	0.1			1.77848	0.15			7.18657	0.05			2.96236	0.13
2.73132	0.1			1.78277	0.15			7.2028	0.05			2.96917	0.13
2.73132	0			1.78277	0			7.2028	0			2.96917	0
2.73735	0			1.78706	0			7.21903	0			2.97598	0
2.73735	0.1			1.78706	0.15			7.21903	0.05			2.97598	0.13
2.74338	0.1			1.79135	0.15			7.23526	0.05			2.98279	0.13
2.74338	0			1.79135	0			7.23526	0			2.98279	0
2.74941	0			1.79564	0			7.25149	0			2.98961	0
2.74941	0.1			1.79564	0.15			7.25149	0.05			2.98961	0.13
2.75544	0.1			1.79993	0.15			7.26772	0.05			2.99642	0.13
2.75544	0			1.79993	0			7.26772	0			2.99642	0
2.76147	0			1.80422	0			7.28395	0			3.00323	0
2.76147	0.1			1.80422	0.15			7.28395	0.05			3.00323	0.13
2.7675	0.1			1.8085	0.15			7.30018	0.05			3.01004	0.13
2.7675	0			1.8085	0			7.30018	0			3.01004	0
2.77353	0			1.81279	0			7.31642	0			3.01685	0
2.77353	0.1			1.81279	0.15			7.31642	0.05			3.01685	0.13
2.77956	0.1			1.81708	0.15			7.33265	0.05			3.02366	0.13
2.77956	0			1.81708	0			7.33265	0			3.02366	0
2.78559	0			1.82137	0			7.34888	0			3.03048	0
2.78559	0.1			1.82137	0.15			7.34888	0.05			3.03048	0.13
2.79162	0.1			1.82566	0.15			7.36511	0.05			3.03729	0.13
2.79162	0			1.82566	0			7.36511	0			3.03729	0
2.79765	0			1.82995	0			7.38134	0			3.0441	0
2.79765	0.1			1.82995	0.15			7.38134	0.05			3.0441	0.13
2.80368	0.1			1.83424	0.15			7.39757	0.05			3.05091	0.13
2.80368	0			1.83424	0			7.39757	0			3.05091	0
2.80971	0			1.83853	0			7.4138	0			3.05772	0
2.80971	0.1			1.83853	0.15			7.4138	0.05			3.05772	0.13
2.81574	0.1			1.84282	0.15			7.43003	0.05			3.06453	0.13
2.81574	0			1.84282	0			7.43003	0			3.06453	0
2.82176	0			1.84711	0			7.44627	0			3.07135	0
2.82176	0.1			1.84711	0.15			7.44627	0.05			3.07135	0.13
2.82779	0.1			1.8514	0.15			7.4625	0.05			3.07816	0.13
2.82779	0			1.8514	0			7.4625	0			3.07816	0
2.83382	0			1.85569	0			7.47873	0			3.08497	0
2.83382	0.1			1.85569	0.15			7.47873	0.05			3.08497	0.13
2.83985	0.1			1.85998	0.15			7.49496	0.05			3.09178	0.13
2.83985	0			1.85998	0			7.49496	0			3.09178	0
2.84588	0			1.86426	0			7.51119	0			3.09859	0
2.84588	0.1			1.86426	0.15			7.51119	0.05			3.09859	0.13
2.85191	0.1			1.86855	0.15			7.52742	0.05			3.1054	0.13
2.85191	0			1.86855	0			7.52742	0			3.1054	0
2.85794	0			1.87284	0			7.54365	0			3.11222	0
2.85794	0.1			1.87284	0.15			7.54365	0.05			3.11222	0.13
2.86397	0.1			1.87713	0.15			7.55988	0.05			3.11903	0.13
2.86397	0			1.87713	0			7.55988	0			3.11903	0
2.87	0			1.88142	0			7.57612	0			3.12584	0
2.87	0.07			1.88142	0.15			7.57612	0.05			3.12584	0.13
2.87603	0.07			1.88571	0.15			7.59235	0.05			3.13265	0.13
2.87603	0			1.88571	0			7.59235	0			3.13265	0
2.88206	0			1.89	0			7.60858	0			3.13946	0
2.88206	0.07			1.89	0.03			7.60858	0.05			3.13946	0.07
2.88809	0.07			1.89429	0.03			7.62481	0.05			3.14627	0.07
2.88809	0			1.89429	0			7.62481	0			3.14627	0
2.89412	0			1.89858	0			7.64104	0			3.15309	0
2.89412	0.07			1.89858	0.03			7.64104	0.02			3.15309	0.07
2.90015	0.07			1.90287	0.03			7.6576	0.02			3.1599	0.07
2.90015	0			1.90287	0			7.6576	0			3.1599	0
2.90618	0			1.90716	0			7.67415	0			3.16671	0
2.90618	0.07			1.90716	0.03			7.67415	0.02			3.16671	0.07
2.91221	0.07			1.91145	0.03			7.69071	0.02			3.17352	0.07
2.91221	0			1.91145	0			7.69071	0			3.17352	0
2.91824	0			1.91574	0			7.70726	0			3.18033	0
2.91824	0.07			1.91574	0.03			7.70726	0.02			3.18033	0.07
2.92426	0.07			1.92002	0.03			7.72382	0.02			3.18714	0.07
2.92426	0			1.92002	0			7.72382	0			3.18714	0
2.93029	0			1.92431	0			7.74038	0			3.19396	0
2.93029	0.07			1.92431	0.03			7.74038	0.02			3.19396	0.07
2.93632	0.07			1.9286	0.03			7.75693	0.02			3.20077	0.07
2.93632	0			1.9286	0			7.75693	0			3.20077	0
2.94235	0			1.93289	0			7.77349	0			3.20758	0
2.94235	0.07			1.93289	0.03			7.77349	0.02			3.20758	0.07
2.94838	0.07			1.93718	0.03			7.79004	0.02			3.21439	0.07
2.94838	0			1.93718	0			7.79004	0			3.21439	0
2.95441	0			1.94147	0			7.8066	0			3.2212	0
2.95441	0.07			1.94147	0.03			7.8066	0.02			3.2212	0.07
2.96044	0.07			1.94576	0.03			7.82315	0.02			3.22801	0.07
2.96044	0			1.94576	0			7.82315	0			3.22801	0
2.96647	0			1.95005	0			7.83971	0			3.23483	0
2.96647	0.07			1.95005	0.03			7.83971	0.02			3.23483	0.07
2.9725	0.07			1.95434	0.03			7.85627	0.02			3.24164	0.07
2.9725	0			1.95434	0			7.85627	0			3.24164	0
2.97853	0			1.95863	0			7.87282	0			3.24845	0
2.97853	0.07			1.95863	0.03			7.87282	0.02			3.24845	0.07
2.98456	0.07			1.96292	0.03			7.88938	0.02			3.25526	0.07
2.98456	0			1.96292	0			7.88938	0			3.25526	0
2.99059	0			1.96721	0			7.90593	0			3.26207	0
2.99059	0.07			1.96721	0.03			7.90593	0.02			3.26207	0.07
2.99662	0.07			1.9715	0.03			7.92249	0.02			3.26888	0.07
2.99662	0			1.9715	0			7.92249	0			3.26888	0
3.00265	0			1.97578	0			7.93905	0			3.27569	0
3.00265	0.07			1.97578	0.03			7.93905	0.02			3.27569	0.07
3.00868	0.07			1.98007	0.03			7.9556	0.02			3.28251	0.07
3.00868	0			1.98007	0			7.9556	0			3.28251	0
3.01471	0			1.98436	0			7.97216	0			3.28932	0
3.01471	0.07			1.98436	0.03			7.97216	0.02			3.28932	0.07
3.02074	0.07			1.98865	0.03			7.98871	0.02			3.29613	0.07
3.02074	0			1.98865	0			7.98871	0			3.29613	0
3.02676	0			1.99294	0			8.00527	0			3.30294	0
3.02676	0.07			1.99294	0.03			8.00527	0.02			3.30294	0.07
3.03279	0.07			1.99723	0.03			8.02183	0.02			3.30975	0.07
3.03279	0			1.99723	0			8.02183	0			3.30975	0
3.03882	0			2.00152	0			8.03838	0			3.31656	0
3.03882	0.07			2.00152	0.03			8.03838	0.02			3.31656	0.07
3.04485	0.07			2.00581	0.03			8.05494	0.02			3.32338	0.07
3.04485	0			2.00581	0			8.05494	0			3.32338	0
3.05088	0			2.0101	0			8.07149	0			3.33019	0
3.05088	0.07			2.0101	0.03			8.07149	0.02			3.33019	0.07
3.05691	0.07			2.01439	0.03			8.08805	0.02			3.337	0.07
3.05691	0			2.01439	0			8.08805	0			3.337	0
3.06294	0			2.01868	0			8.1046	0			3.34381	0
3.06294	0.07			2.01868	0.03			8.1046	0.02			3.34381	0.07
3.06897	0.07			2.02297	0.03			8.12116	0.02			3.35062	0.07
3.06897	0			2.02297	0			8.12116	0			3.35062	0
3.075	0			2.02725	0			8.13772	0			3.35743	0
3.075	0.07			2.02725	0.03			8.13772	0.02			3.35743	0.07
3.08103	0.07			2.03154	0.03			8.15427	0.02			3.36425	0.07
3.08103	0			2.03154	0			8.15427	0			3.36425	0
3.08706	0			2.03583	0			8.17083	0			3.37106	0
3.08706	0.07			2.03583	0.03			8.17083	0.02			3.37106	0.07
3.09309	0.07			2.04012	0.03			8.18738	0.02			3.37787	0.07
3.09309	0			2.04012	0			8.18738	0			3.37787	0
3.09912	0			2.04441	0			8.20394	0			3.38468	0
3.09912	0.07			2.04441	0.03			8.20394	0.02			3.38468	0.07
3.10515	0.07			2.0487	0.03			8.2205	0.02			3.39149	0.07
3.10515	0			2.0487	0			8.2205	0			3.39149	0
3.11118	0			2.05299	0			8.23705	0			3.3983	0
3.11118	0.07			2.05299	0.03			8.23705	0.02			3.3983	0.07
3.11721	0.07			2.05728	0.03			8.25361	0.02			3.40512	0.07
3.11721	0			2.05728	0			8.25361	0			3.40512	0
3.12324	0			2.06157	0			8.27016	0			3.41193	0
3.12324	0.07			2.06157	0.03			8.27016	0.02			3.41193	0.07
3.12926	0.07			2.06586	0.03			8.28672	0.02			3.41874	0.07
3.12926	0			2.06586	0			8.28672	0			3.41874	0
3.13529	0			2.07015	0			8.30328	0			3.42555	0
3.13529	0.07			2.07015	0.03			8.30328	0.02			3.42555	0.07
3.14132	0.07			2.07444	0.03			8.31983	0.02			3.43236	0.07
3.14132	0			2.07444	0			8.31983	0			3.43236	0
3.14735	0			2.07873	0			8.33639	0			3.43917	0
3.14735	0.07			2.07873	0.03			8.33639	0.02			3.43917	0.07
3.15338	0.07			2.08301	0.03			8.35294	0.02			3.44599	0.07
3.15338	0			2.08301	0			8.35294	0			3.44599	0
3.15941	0			2.0873	0			8.3695	0			3.4528	0
3.15941	0.07			2.0873	0.03			8.3695	0.02			3.4528	0.07
3.16544	0.07			2.09159	0.03			8.38605	0.02			3.45961	0.07
3.16544	0			2.09159	0			8.38605	0			3.45961	0
3.17147	0			2.09588	0			8.40261	0			3.46642	0
3.17147	0.07			2.09588	0.03			8.40261	0.02			3.46642	0.07
3.1775	0.07			2.10017	0.03			8.41917	0.02			3.47323	0.07
3.1775	0			2.10017	0			8.41917	0			3.47323	0
3.18353	0			2.10446	0			8.43572	0			3.48004	0
3.18353	0.07			2.10446	0.03			8.43572	0.02			3.48004	0.07
3.18956	0.07			2.10875	0.03			8.45228	0.02			3.48686	0.07
3.18956	0			2.10875	0			8.45228	0			3.48686	0
3.19559	0			2.11304	0			8.46883	0			3.49367	0
3.19559	0.07			2.11304	0.03			8.46883	0.02			3.49367	0.07
3.20162	0.07			2.11733	0.03			8.48539	0.02			3.50048	0.07
3.20162	0			2.11733	0			8.48539	0			3.50048	0
3.20765	0			2.12162	0			8.50195	0			3.50729	0
3.20765	0.07			2.12162	0.03			8.50195	0.02			3.50729	0.07
3.21368	0.07			2.12591	0.03			8.5185	0.02			3.5141	0.07
3.21368	0			2.12591	0			8.5185	0			3.5141	0
3.21971	0			2.1302	0			8.53506	0			3.52091	0
3.21971	0.07			2.1302	0.03			8.53506	0.02			3.52091	0.07
3.22574	0.07			2.13449	0.03			8.55161	0.02			3.52773	0.07
3.22574	0			2.13449	0			8.55161	0			3.52773	0
3.23176	0			2.13877	0			8.56817	0			3.53454	0
3.23176	0.07			2.13877	0.03			8.56817	0.02			3.53454	0.07
3.23779	0.07			2.14306	0.03			8.58472	0.02			3.54135	0.07
3.23779	0			2.14306	0			8.58472	0			3.54135	0
3.24382	0			2.14735	0			8.60128	0			3.54816	0
3.24382	0.07			2.14735	0.03			8.60128	0.02			3.54816	0.07
3.24985	0.07			2.15164	0.03			8.61784	0.02			3.55497	0.07
3.24985	0			2.15164	0			8.61784	0			3.55497	0
3.25588	0			2.15593	0			8.63439	0			3.56178	0
3.25588	0.07			2.15593	0.03			8.63439	0.02			3.56178	0.07
3.26191	0.07			2.16022	0.03			8.65095	0.02			3.5686	0.07
3.26191	0			2.16022	0			8.65095	0			3.5686	0
3.26794	0			2.16451	0			8.6675	0			3.57541	0
3.26794	0.07			2.16451	0.03			8.6675	0.02			3.57541	0.07
3.27397	0.07			2.1688	0.03			8.68406	0.02			3.58222	0.07
3.27397	0			2.1688	0			8.68406	0			3.58222	0
3.28	0			2.17309	0			8.70062	0			3.58903	0
3.28	0.07			2.17309	0.03			8.70062	0.02			3.58903	0.07
3.28603	0.07			2.17738	0.03			8.71717	0.02			3.59584	0.07
3.28603	0			2.17738	0			8.71717	0			3.59584	0
3.29206	0			2.18167	0			8.73373	0			3.60265	0
3.29206	0.07			2.18167	0.03			8.73373	0.02			3.60265	0.07
3.29809	0.07			2.18596	0.03			8.75028	0.02			3.60947	0.07
3.29809	0			2.18596	0			8.75028	0			3.60947	0
3.30412	0			2.19025	0			8.76684	0			3.61628	0
3.30412	0.07			2.19025	0.03			8.76684	0.02			3.61628	0.07
3.31015	0.07			2.19453	0.03			8.7834	0.02			3.62309	0.07
3.31015	0			2.19453	0			8.7834	0			3.62309	0
3.31618	0			2.19882	0			8.79995	0			3.6299	0
3.31618	0.07			2.19882	0.03			8.79995	0.02			3.6299	0.07
3.32221	0.07			2.20311	0.03			8.81651	0.02			3.63671	0.07
3.32221	0			2.20311	0			8.81651	0			3.63671	0
3.32824	0			2.2074	0			8.83306	0			3.64352	0
3.32824	0.07			2.2074	0.03			8.83306	0.02			3.64352	0.07
3.33426	0.07			2.21169	0.03			8.84962	0.02			3.65034	0.07
3.33426	0			2.21169	0			8.84962	0			3.65034	0
3.34029	0			2.21598	0			8.86617	0			3.65715	0
3.34029	0.07			2.21598	0.03			8.86617	0.02			3.65715	0.07
3.34632	0.07			2.22027	0.03			8.88273	0.02			3.66396	0.07
3.34632	0			2.22027	0			8.88273	0			3.66396	0
3.35235	0			2.22456	0			8.89929	0			3.67077	0
3.35235	0.07			2.22456	0.03			8.89929	0.02			3.67077	0.07
3.35838	0.07			2.22885	0.03			8.91584	0.02			3.67758	0.07
3.35838	0			2.22885	0			8.91584	0			3.67758	0
3.36441	0			2.23314	0			8.9324	0			3.68439	0
3.36441	0.07			2.23314	0.03			8.9324	0.02			3.68439	0.07
3.37044	0.07			2.23743	0.03			8.94895	0.02			3.69121	0.07
3.37044	0			2.23743	0			8.94895	0			3.69121	0
3.37647	0			2.24172	0			8.96551	0			3.69802	0
3.37647	0.07			2.24172	0.03			8.96551	0.02			3.69802	0.07
3.3825	0.07			2.246	0.03			8.98207	0.02			3.70483	0.07
3.3825	0			2.246	0			8.98207	0			3.70483	0
3.38853	0			2.25029	0			8.99862	0			3.71164	0
3.38853	0.07			2.25029	0.03			8.99862	0.02			3.71164	0.07
3.39456	0.07			2.25458	0.03			9.01518	0.02			3.71845	0.07
3.39456	0			2.25458	0			9.01518	0			3.71845	0
3.40059	0			2.25887	0			9.03173	0			3.72526	0
3.40059	0.07			2.25887	0.03			9.03173	0.02			3.72526	0.07
3.40662	0.07			2.26316	0.03			9.04829	0.02			3.73207	0.07
3.40662	0			2.26316	0			9.04829	0			3.73207	0
3.41265	0			2.26745	0			9.06485	0			3.73889	0
3.41265	0.07			2.26745	0.03			9.06485	0.02			3.73889	0.07
3.41868	0.07			2.27174	0.03			9.0814	0.02			3.7457	0.07
3.41868	0			2.27174	0			9.0814	0			3.7457	0
3.42471	0			2.27603	0			9.09796	0			3.75251	0
3.42471	0.07			2.27603	0.03			9.09796	0.02			3.75251	0.07
3.43074	0.07			2.28032	0.03			9.11451	0.02			3.75932	0.07
3.43074	0			2.28032	0			9.11451	0			3.75932	0
3.43676	0			2.28461	0			9.13107	0			3.76613	0
3.43676	0.07			2.28461	0.03			9.13107	0.02			3.76613	0.07
3.44279	0.07			2.2889	0.03			9.14762	0.02			3.77294	0.07
3.44279	0			2.2889	0			9.14762	0			3.77294	0
3.44882	0			2.29319	0			9.16418	0			3.77976	0
3.44882	0.07			2.29319	0.03			9.16418	0.02			3.77976	0.07
3.45485	0.07			2.29748	0.03			9.18074	0.02			3.78657	0.07
3.45485	0			2.29748	0			9.18074	0			3.78657	0
3.46088	0			2.30176	0			9.19729	0			3.79338	0
3.46088	0.07			2.30176	0.03			9.19729	0.02			3.79338	0.07
3.46691	0.07			2.30605	0.03			9.21385	0.02			3.80019	0.07
3.46691	0			2.30605	0			9.21385	0			3.80019	0
3.47294	0			2.31034	0			9.2304	0			3.807	0
3.47294	0.07			2.31034	0.03			9.2304	0.02			3.807	0.07
3.47897	0.07			2.31463	0.03			9.24696	0.02			3.81381	0.07
3.47897	0			2.31463	0			9.24696	0			3.81381	0
3.485	0			2.31892	0			9.26352	0			3.82063	0
3.485	0.07			2.31892	0.03			9.26352	0.02			3.82063	0.07
3.49115	0.07			2.32321	0.03			9.28007	0.02			3.82744	0.07
3.49115	0			2.32321	0			9.28007	0			3.82744	0
3.4973	0			2.3275	0			32.4748	0			3.83425	0
3.4973	0.07			2.3275	0.03			32.4748	0.01			3.83425	0.06
3.50345	0.07			2.33179	0.03			32.4914	0.01			3.84106	0.06
3.50345	0			2.33179	0			32.4914	0			3.84106	0
3.5096	0			2.33608	0			32.508	0			3.84787	0
3.5096	0.07			2.33608	0.03			32.508	0.01			3.84787	0.06
3.51575	0.07			2.34037	0.03			32.5245	0.01			3.85468	0.06
3.51575	0			2.34037	0			32.5245	0			3.85468	0
3.5219	0			2.34466	0			32.5411	0			3.8615	0
3.5219	0.07			2.34466	0.03			32.5411	0.01			3.8615	0.06
3.52805	0.07			2.34895	0.03			32.5576	0.01			3.86831	0.06
3.52805	0			2.34895	0			32.5576	0			3.86831	0
3.5342	0			2.35324	0			32.5742	0			3.87512	0
3.5342	0.07			2.35324	0.03			32.5742	0.01			3.87512	0.06
3.54035	0.07			2.35752	0.03			32.5907	0.01			3.88193	0.06
3.54035	0			2.35752	0			32.5907	0			3.88193	0
3.5465	0			2.36181	0			32.6073	0			3.88874	0
3.5465	0.07			2.36181	0.03			32.6073	0.01			3.88874	0.06
3.55265	0.07			2.3661	0.03			32.6239	0.01			3.89555	0.06
3.55265	0			2.3661	0			32.6239	0			3.89555	0
3.5588	0			2.37039	0			32.6404	0			3.90237	0
3.5588	0.07			2.37039	0.03			32.6404	0.01			3.90237	0.06
3.56495	0.07			2.37468	0.03			32.657	0.01			3.90918	0.06
3.56495	0			2.37468	0			32.657	0			3.90918	0
3.5711	0			2.37897	0			32.6735	0			3.91599	0
3.5711	0.07			2.37897	0.03			32.6735	0.01			3.91599	0.06
3.57725	0.07			2.38326	0.03			32.6901	0.01			3.9228	0.06
3.57725	0			2.38326	0			32.6901	0			3.9228	0
3.5834	0			2.38755	0			32.7066	0			3.92961	0
3.5834	0.07			2.38755	0.03			32.7066	0.01			3.92961	0.06
3.58955	0.07			2.39184	0.03			32.7232	0.01			3.93642	0.06
3.58955	0			2.39184	0			32.7232	0			3.93642	0
3.5957	0			2.39613	0			32.7397	0			3.94324	0
3.5957	0.07			2.39613	0.03			32.7397	0.01			3.94324	0.06
3.60185	0.07			2.40042	0.03			32.7563	0.01			3.95005	0.06
3.60185	0			2.40042	0			32.7563	0			3.95005	0
3.608	0			2.40471	0			32.7729	0			3.95686	0
3.608	0.07			2.40471	0.03			32.7729	0.01			3.95686	0.06
3.61415	0.07			2.409	0.03			32.7894	0.01			3.96367	0.06
3.61415	0			2.409	0			32.7894	0			3.96367	0
3.6203	0			2.41328	0			32.806	0			3.97048	0
3.6203	0.07			2.41328	0.03			32.806	0.01			3.97048	0.06
3.62645	0.07			2.41757	0.03			32.8225	0.01			3.97729	0.06
3.62645	0			2.41757	0			32.8225	0			3.97729	0
3.6326	0			2.42186	0			32.8391	0			3.98411	0
3.6326	0.07			2.42186	0.03			32.8391	0.01			3.98411	0.06
3.63875	0.07			2.42615	0.03			32.8556	0.01			3.99092	0.06
3.63875	0			2.42615	0			32.8556	0			3.99092	0
3.6449	0			2.43044	0			32.8722	0			3.99773	0
3.6449	0.07			2.43044	0.03			32.8722	0.01			3.99773	0.06
3.65105	0.07			2.43473	0.03			32.8887	0.01			4.00454	0.06
3.65105	0			2.43473	0			32.8887	0			4.00454	0
3.6572	0			2.43902	0			32.9053	0			4.01135	0
3.6572	0.07			2.43902	0.03			32.9053	0.01			4.01135	0.06
3.66335	0.07			2.44331	0.03			32.9219	0.01			4.01816	0.06
3.66335	0			2.44331	0			32.9219	0			4.01816	0
3.6695	0			2.4476	0			32.9384	0			4.02498	0
3.6695	0.07			2.4476	0.03			32.9384	0.01			4.02498	0.06
3.67565	0.07			2.45189	0.03			32.955	0.01			4.03179	0.06
3.67565	0			2.45189	0			32.955	0			4.03179	0
3.6818	0			2.45618	0			32.9715	0			4.0386	0
3.6818	0.07			2.45618	0.03			32.9715	0.01			4.0386	0.06
3.68795	0.07			2.46047	0.03			32.9881	0.01			4.04541	0.06
3.68795	0			2.46047	0			32.9881	0			4.04541	0
3.6941	0			2.46475	0			33.0046	0			4.05222	0
3.6941	0.07			2.46475	0.03			33.0046	0.01			4.05222	0.06
3.70025	0.07			2.46904	0.03			33.0212	0.01			4.05903	0.06
3.70025	0			2.46904	0			33.0212	0			4.05903	0
3.7064	0			2.47333	0			33.0377	0			4.06585	0
3.7064	0.07			2.47333	0.03			33.0377	0.01			4.06585	0.06
3.71255	0.07			2.47762	0.03			33.0543	0.01			4.07266	0.06
3.71255	0			2.47762	0			33.0543	0			4.07266	0
3.7187	0			2.48191	0			33.0709	0			4.07947	0
3.7187	0.07			2.48191	0.03			33.0709	0.01			4.07947	0.06
3.72485	0.07			2.4862	0.03			33.0874	0.01			4.08628	0.06
3.72485	0			2.4862	0			33.0874	0			4.08628	0
3.731	0			2.49049	0			33.104	0			4.09309	0
3.731	0.07			2.49049	0.03			33.104	0.01			4.09309	0.06
3.73715	0.07			2.49478	0.03			33.1205	0.01			4.0999	0.06
3.73715	0			2.49478	0			33.1205	0			4.0999	0
3.7433	0			2.49907	0			33.1371	0			4.10672	0
3.7433	0.07			2.49907	0.03			33.1371	0.01			4.10672	0.06
3.74945	0.07			2.50336	0.03			33.1536	0.01			4.11353	0.06
3.74945	0			2.50336	0			33.1536	0			4.11353	0
3.7556	0			2.50765	0			33.1702	0			4.12034	0
3.7556	0.07			2.50765	0.03			33.1702	0.01			4.12034	0.06
3.76175	0.07			2.51194	0.03			33.1868	0.01			4.12715	0.06
3.76175	0			2.51194	0			33.1868	0			4.12715	0
3.7679	0			2.51623	0			33.2033	0			4.13396	0
3.7679	0.07			2.51623	0.03			33.2033	0.01			4.13396	0.06
3.77405	0.07			2.52051	0.03			33.2199	0.01			4.14077	0.06
3.77405	0			2.52051	0			33.2199	0			4.14077	0
3.7802	0			2.5248	0			33.2364	0			4.14759	0
3.7802	0.07			2.5248	0.03			33.2364	0.01			4.14759	0.06
3.78635	0.07			2.52909	0.03			33.253	0.01			4.1544	0.06
3.78635	0			2.52909	0			33.253	0			4.1544	0
3.7925	0			2.53338	0			33.2695	0			4.16121	0
3.7925	0.07			2.53338	0.03			33.2695	0.01			4.16121	0.06
3.79865	0.07			2.53767	0.03			33.2861	0.01			4.16802	0.06
3.79865	0			2.53767	0			33.2861	0			4.16802	0
3.8048	0			2.54196	0			33.3026	0			4.17483	0
3.8048	0.07			2.54196	0.03			33.3026	0.01			4.17483	0.06
3.81095	0.07			2.54625	0.03			33.3192	0.01			4.18164	0.06
3.81095	0			2.54625	0			33.3192	0			4.18164	0
3.8171	0			2.55054	0			33.3358	0			4.18846	0
3.8171	0.07			2.55054	0.03			33.3358	0.01			4.18846	0.06
3.82325	0.07			2.55483	0.03			33.3523	0.01			4.19527	0.06
3.82325	0			2.55483	0			33.3523	0			4.19527	0
3.8294	0			2.55912	0			33.3689	0			4.20208	0
3.8294	0.07			2.55912	0.03			33.3689	0.01			4.20208	0.06
3.83555	0.07			2.56341	0.03			33.3854	0.01			4.20889	0.06
3.83555	0			2.56341	0			33.3854	0			4.20889	0
3.8417	0			2.5677	0			33.402	0			4.2157	0
3.8417	0.07			2.5677	0.03			33.402	0.01			4.2157	0.06
3.84785	0.07			2.57199	0.03			33.4185	0.01			4.22251	0.06
3.84785	0			2.57199	0			33.4185	0			4.22251	0
3.854	0			2.57627	0			33.4351	0			4.22932	0
3.854	0.07			2.57627	0.03			33.4351	0.01			4.22932	0.06
3.86015	0.07			2.58056	0.03			33.4516	0.01			4.23614	0.06
3.86015	0			2.58056	0			33.4516	0			4.23614	0
3.8663	0			2.58485	0			33.4682	0			4.24295	0
3.8663	0.07			2.58485	0.03			33.4682	0.01			4.24295	0.06
3.87245	0.07			2.58914	0.03			33.4848	0.01			4.24976	0.06
3.87245	0			2.58914	0			33.4848	0			4.24976	0
3.8786	0			2.59343	0			33.5013	0			4.25657	0
3.8786	0.07			2.59343	0.03			33.5013	0.01			4.25657	0.06
3.88475	0.07			2.59772	0.03			33.5179	0.01			4.26338	0.06
3.88475	0			2.59772	0			33.5179	0			4.26338	0
3.8909	0			2.60201	0			33.5344	0			4.27019	0
3.8909	0.07			2.60201	0.03			33.5344	0.01			4.27019	0.06
3.89705	0.07			2.6063	0.03			33.551	0.01			4.27701	0.06
3.89705	0			2.6063	0			33.551	0			4.27701	0
3.9032	0			2.61059	0			33.5675	0			4.28382	0
3.9032	0.07			2.61059	0.03			33.5675	0.01			4.28382	0.06
3.90935	0.07			2.61488	0.03			33.5841	0.01			4.29063	0.06
3.90935	0			2.61488	0			33.5841	0			4.29063	0
3.9155	0			2.61917	0			33.6006	0			4.29744	0
3.9155	0.07			2.61917	0.03			33.6006	0.01			4.29744	0.06
3.92165	0.07			2.62346	0.03			33.6172	0.01			4.30425	0.06
3.92165	0			2.62346	0			33.6172	0			4.30425	0
3.9278	0			2.62775	0			33.6338	0			4.31106	0
3.9278	0.07			2.62775	0.03			33.6338	0.01			4.31106	0.06
3.93395	0.07			2.63203	0.03			33.6503	0.01			4.31788	0.06
3.93395	0			2.63203	0			33.6503	0			4.31788	0
3.9401	0			2.63632	0			33.6669	0			4.32469	0
3.9401	0.07			2.63632	0.03			33.6669	0.01			4.32469	0.06
3.94625	0.07			2.64061	0.03			33.6834	0.01			4.3315	0.06
3.94625	0			2.64061	0			33.6834	0			4.3315	0
3.9524	0			2.6449	0			33.7	0			4.33831	0
3.9524	0.07			2.6449	0.03			33.7	0.01			4.33831	0.06
3.95855	0.07			2.64919	0.03			33.7165	0.01			4.34512	0.06
3.95855	0			2.64919	0			33.7165	0			4.34512	0
3.9647	0			2.65348	0			33.7331	0			4.35193	0
3.9647	0.07			2.65348	0.03			33.7331	0.01			4.35193	0.06
3.97085	0.07			2.65777	0.03			33.7496	0.01			4.35875	0.06
3.97085	0			2.65777	0			33.7496	0			4.35875	0
3.977	0			2.66206	0			33.7662	0			4.36556	0
3.977	0.07			2.66206	0.03			33.7662	0.01			4.36556	0.06
3.98315	0.07			2.66635	0.03			33.7828	0.01			4.37237	0.06
3.98315	0			2.66635	0			33.7828	0			4.37237	0
3.9893	0			2.67064	0			33.7993	0			4.37918	0
3.9893	0.07			2.67064	0.03			33.7993	0.01			4.37918	0.06
3.99545	0.07			2.67493	0.03			33.8159	0.01			4.38599	0.06
3.99545	0			2.67493	0			33.8159	0			4.38599	0
4.0016	0			2.67922	0			33.8324	0			4.3928	0
4.0016	0.07			2.67922	0.03			33.8324	0.01			4.3928	0.06
4.00775	0.07			2.6835	0.03			33.849	0.01			4.39962	0.06
4.00775	0			2.6835	0			33.849	0			4.39962	0
4.0139	0			2.68779	0			33.8655	0			4.40643	0
4.0139	0.07			2.68779	0.03			33.8655	0.01			4.40643	0.06
4.02005	0.07			2.69208	0.03			33.8821	0.01			4.41324	0.06
4.02005	0			2.69208	0			33.8821	0			4.41324	0
4.0262	0			2.69637	0			33.8987	0			4.42005	0
4.0262	0.07			2.69637	0.03			33.8987	0.01			4.42005	0.06
4.03235	0.07			2.70066	0.03			33.9152	0.01			4.42686	0.06
4.03235	0			2.70066	0			33.9152	0			4.42686	0
4.0385	0			2.70495	0			33.9318	0			4.43367	0
4.0385	0.07			2.70495	0.03			33.9318	0.01			4.43367	0.06
4.04465	0.07			2.70924	0.03			33.9483	0.01			4.44049	0.06
4.04465	0			2.70924	0			33.9483	0			4.44049	0
4.0508	0			2.71353	0			33.9649	0			4.4473	0
4.0508	0.07			2.71353	0.03			33.9649	0.01			4.4473	0.06
4.05695	0.07			2.71782	0.03			33.9814	0.01			4.45411	0.06
4.05695	0			2.71782	0			33.9814	0			4.45411	0
4.0631	0			2.72211	0			33.998	0			4.46092	0
4.0631	0.07			2.72211	0.03			33.998	0.01			4.46092	0.06
4.06925	0.07			2.7264	0.03			34.0145	0.01			4.46773	0.06
4.06925	0			2.7264	0			34.0145	0			4.46773	0
4.0754	0			2.73069	0			34.0311	0			4.47454	0
4.0754	0.07			2.73069	0.03			34.0311	0.01			4.47454	0.06
4.08155	0.07			2.73498	0.03			34.0477	0.01			4.48136	0.06
4.08155	0			2.73498	0			34.0477	0			4.48136	0
4.0877	0			2.73926	0			34.0642	0			4.48817	0
4.0877	0.07			2.73926	0.03			34.0642	0.01			4.48817	0.06
4.09385	0.07			2.74355	0.03			34.0808	0.01			4.49498	0.06
4.09385	0			2.74355	0			34.0808	0			4.49498	0
4.1	0			2.74784	0			34.0973	0			4.50179	0
4.1	0.01			2.74784	0.03			34.0973	0.01			4.50179	0.06
4.10603	0.01			2.75213	0.03			34.1139	0.01			4.5086	0.06
4.10603	0			2.75213	0			34.1139	0			4.5086	0
4.11206	0			2.75642	0							4.51541	0
4.11206	0.01			2.75642	0.03							4.51541	0.06
4.11809	0.01			2.76071	0.03							4.52223	0.06
4.11809	0			2.76071	0							4.52223	0
4.12412	0			2.765	0							4.52904	0
4.12412	0.01			2.765	0.02							4.52904	0.03
4.13015	0.01			2.76929	0.02							4.53599	0.03
4.13015	0			2.76929	0							4.53599	0
4.13618	0			2.77358	0							4.54293	0
4.13618	0.01			2.77358	0.02							4.54293	0.03
4.14221	0.01			2.77787	0.02							4.54988	0.03
4.14221	0			2.77787	0							4.54988	0
4.14824	0			2.78216	0							4.55683	0
4.14824	0.01			2.78216	0.02							4.55683	0.03
4.15426	0.01			2.78645	0.02							4.56378	0.03
4.15426	0			2.78645	0							4.56378	0
4.16029	0			2.79074	0							4.57072	0
4.16029	0.01			2.79074	0.02							4.57072	0.03
4.16632	0.01			2.79502	0.02							4.57767	0.03
4.16632	0			2.79502	0							4.57767	0
4.17235	0			2.79931	0							4.58462	0
4.17235	0.01			2.79931	0.02							4.58462	0.03
4.17838	0.01			2.8036	0.02							4.59157	0.03
4.17838	0			2.8036	0							4.59157	0
4.18441	0			2.80789	0							4.59852	0
4.18441	0.01			2.80789	0.02							4.59852	0.03
4.19044	0.01			2.81218	0.02							4.60546	0.03
4.19044	0			2.81218	0							4.60546	0
4.19647	0			2.81647	0							4.61241	0
4.19647	0.01			2.81647	0.02							4.61241	0.03
4.2025	0.01			2.82076	0.02							4.61936	0.03
4.2025	0			2.82076	0							4.61936	0
4.20853	0			2.82505	0							4.62631	0
4.20853	0.01			2.82505	0.02							4.62631	0.03
4.21456	0.01			2.82934	0.02							4.63326	0.03
4.21456	0			2.82934	0							4.63326	0
4.22059	0			2.83363	0							4.6402	0
4.22059	0.01			2.83363	0.02							4.6402	0.03
4.22662	0.01			2.83792	0.02							4.64715	0.03
4.22662	0			2.83792	0							4.64715	0
4.23265	0			2.84221	0							4.6541	0
4.23265	0.01			2.84221	0.02							4.6541	0.03
4.23868	0.01			2.8465	0.02							4.66105	0.03
4.23868	0			2.8465	0							4.66105	0
4.24471	0			2.85078	0							4.66799	0
4.24471	0.01			2.85078	0.02							4.66799	0.03
4.25074	0.01			2.85507	0.02							4.67494	0.03
4.25074	0			2.85507	0							4.67494	0
4.25676	0			2.85936	0							4.68189	0
4.25676	0.01			2.85936	0.02							4.68189	0.03
4.26279	0.01			2.86365	0.02							4.68884	0.03
4.26279	0			2.86365	0							4.68884	0
4.26882	0			2.86794	0							4.69579	0
4.26882	0.01			2.86794	0.02							4.69579	0.03
4.27485	0.01			2.87223	0.02							4.70273	0.03
4.27485	0			2.87223	0							4.70273	0
4.28088	0			2.87652	0							4.70968	0
4.28088	0.01			2.87652	0.02							4.70968	0.03
4.28691	0.01			2.88081	0.02							4.71663	0.03
4.28691	0			2.88081	0							4.71663	0
4.29294	0			2.8851	0							4.72358	0
4.29294	0.01			2.8851	0.02							4.72358	0.03
4.29897	0.01			2.88939	0.02							4.73053	0.03
4.29897	0			2.88939	0							4.73053	0
4.305	0			2.89368	0							4.73747	0
4.305	0.01			2.89368	0.02							4.73747	0.03
4.31103	0.01			2.89797	0.02							4.74442	0.03
4.31103	0			2.89797	0							4.74442	0
4.31706	0			2.90225	0							4.75137	0
4.31706	0.01			2.90225	0.02							4.75137	0.03
4.32309	0.01			2.90654	0.02							4.75832	0.03
4.32309	0			2.90654	0							4.75832	0
4.32912	0			2.91083	0							4.76526	0
4.32912	0.01			2.91083	0.02							4.76526	0.03
4.33515	0.01			2.91512	0.02							4.77221	0.03
4.33515	0			2.91512	0							4.77221	0
4.34118	0			2.91941	0							4.77916	0
4.34118	0.01			2.91941	0.02							4.77916	0.03
4.34721	0.01			2.9237	0.02							4.78611	0.03
4.34721	0			2.9237	0							4.78611	0
4.35324	0			2.92799	0							4.79306	0
4.35324	0.01			2.92799	0.02							4.79306	0.03
4.35926	0.01			2.93228	0.02							4.8	0.03
4.35926	0			2.93228	0							4.8	0
4.36529	0			2.93657	0							4.80695	0
4.36529	0.01			2.93657	0.02							4.80695	0.03
4.37132	0.01			2.94086	0.02							4.8139	0.03
4.37132	0			2.94086	0							4.8139	0
4.37735	0			2.94515	0							4.82085	0
4.37735	0.01			2.94515	0.02							4.82085	0.03
4.38338	0.01			2.94944	0.02							4.8278	0.03
4.38338	0			2.94944	0							4.8278	0
4.38941	0			2.95373	0							4.83474	0
4.38941	0.01			2.95373	0.02							4.83474	0.03
4.39544	0.01			2.95801	0.02							4.84169	0.03
4.39544	0			2.95801	0							4.84169	0
4.40147	0			2.9623	0							4.84864	0
4.40147	0.01			2.9623	0.02							4.84864	0.03
4.4075	0.01			2.96659	0.02							4.85559	0.03
4.4075	0			2.96659	0							4.85559	0
4.41353	0			2.97088	0							4.86254	0
4.41353	0.01			2.97088	0.02							4.86254	0.03
4.41956	0.01			2.97517	0.02							4.86948	0.03
4.41956	0			2.97517	0							4.86948	0
4.42559	0			2.97946	0							4.87643	0
4.42559	0.01			2.97946	0.02							4.87643	0.03
4.43162	0.01			2.98375	0.02							4.88338	0.03
4.43162	0			2.98375	0							4.88338	0
4.43765	0			2.98804	0							4.89033	0
4.43765	0.01			2.98804	0.02							4.89033	0.03
4.44368	0.01			2.99233	0.02							4.89727	0.03
4.44368	0			2.99233	0							4.89727	0
4.44971	0			2.99662	0							4.90422	0
4.44971	0.01			2.99662	0.02							4.90422	0.03
4.45574	0.01			3.00091	0.02							4.91117	0.03
4.45574	0			3.00091	0							4.91117	0
4.46176	0			3.0052	0							4.91812	0
4.46176	0.01			3.0052	0.02							4.91812	0.03
4.46779	0.01			3.00949	0.02							4.92507	0.03
4.46779	0			3.00949	0							4.92507	0
4.47382	0			3.01377	0							4.93201	0
4.47382	0.01			3.01377	0.02							4.93201	0.03
4.47985	0.01			3.01806	0.02							4.93896	0.03
4.47985	0			3.01806	0							4.93896	0
4.48588	0			3.02235	0							4.94591	0
4.48588	0.01			3.02235	0.02							4.94591	0.03
4.49191	0.01			3.02664	0.02							4.95286	0.03
4.49191	0			3.02664	0							4.95286	0
4.49794	0			3.03093	0							4.95981	0
4.49794	0.01			3.03093	0.02							4.95981	0.03
4.50397	0.01			3.03522	0.02							4.96675	0.03
4.50397	0			3.03522	0							4.96675	0
4.51	0			3.03951	0							4.9737	0
4.51	0.01			3.03951	0.02							4.9737	0.03
4.51603	0.01			3.0438	0.02							4.98065	0.03
4.51603	0			3.0438	0							4.98065	0
4.52206	0			3.04809	0							4.9876	0
4.52206	0.01			3.04809	0.02							4.9876	0.03
4.52809	0.01			3.05238	0.02							4.99454	0.03
4.52809	0			3.05238	0							4.99454	0
4.53412	0			3.05667	0							5.00149	0
4.53412	0.01			3.05667	0.02							5.00149	0.03
4.54015	0.01			3.06096	0.02							5.00844	0.03
4.54015	0			3.06096	0							5.00844	0
4.54618	0			3.06525	0							5.01539	0
4.54618	0.01			3.06525	0.02							5.01539	0.03
4.55221	0.01			3.06953	0.02							5.02234	0.03
4.55221	0			3.06953	0							5.02234	0
4.55824	0			3.07382	0							5.02928	0
4.55824	0.01			3.07382	0.02							5.02928	0.03
4.56426	0.01			3.07811	0.02							5.03623	0.03
4.56426	0			3.07811	0							5.03623	0
4.57029	0			3.0824	0							5.04318	0
4.57029	0.01			3.0824	0.02							5.04318	0.03
4.57632	0.01			3.08669	0.02							5.05013	0.03
4.57632	0			3.08669	0							5.05013	0
4.58235	0			3.09098	0							5.05708	0
4.58235	0.01			3.09098	0.02							5.05708	0.03
4.58838	0.01			3.09527	0.02							5.06402	0.03
4.58838	0			3.09527	0							5.06402	0
4.59441	0			3.09956	0							5.07097	0
4.59441	0.01			3.09956	0.02							5.07097	0.03
4.60044	0.01			3.10385	0.02							5.07792	0.03
4.60044	0			3.10385	0							5.07792	0
4.60647	0			3.10814	0							5.08487	0
4.60647	0.01			3.10814	0.02							5.08487	0.03
4.6125	0.01			3.11243	0.02							5.09182	0.03
4.6125	0			3.11243	0							5.09182	0
4.61853	0			3.11672	0							5.09876	0
4.61853	0.01			3.11672	0.02							5.09876	0.03
4.62456	0.01			3.121	0.02							5.10571	0.03
4.62456	0			3.121	0							5.10571	0
4.63059	0			3.12529	0							5.11266	0
4.63059	0.01			3.12529	0.02							5.11266	0.03
4.63662	0.01			3.12958	0.02							5.11961	0.03
4.63662	0			3.12958	0							5.11961	0
4.64265	0			3.13387	0							5.12655	0
4.64265	0.01			3.13387	0.02							5.12655	0.03
4.64868	0.01			3.13816	0.02							5.1335	0.03
4.64868	0			3.13816	0							5.1335	0
4.65471	0			3.14245	0							5.14045	0
4.65471	0.01			3.14245	0.02							5.14045	0.03
4.66074	0.01			3.14674	0.02							5.1474	0.03
4.66074	0			3.14674	0							5.1474	0
4.66676	0			3.15103	0							5.15435	0
4.66676	0.01			3.15103	0.02							5.15435	0.03
4.67279	0.01			3.15532	0.02							5.16129	0.03
4.67279	0			3.15532	0							5.16129	0
4.67882	0			3.15961	0							5.16824	0
4.67882	0.01			3.15961	0.02							5.16824	0.03
4.68485	0.01			3.1639	0.02							5.17519	0.03
4.68485	0			3.1639	0							5.17519	0
4.69088	0			3.16819	0							5.18214	0
4.69088	0.01			3.16819	0.02							5.18214	0.03
4.69691	0.01			3.17248	0.02							5.18909	0.03
4.69691	0			3.17248	0							5.18909	0
4.70294	0			3.17676	0							5.19603	0
4.70294	0.01			3.17676	0.02							5.19603	0.03
4.70897	0.01			3.18105	0.02							5.20298	0.03
4.70897	0			3.18105	0							5.20298	0
4.715	0			3.18534	0							5.20993	0
4.715	0.03			3.18534	0.02							5.20993	0.03
4.72103	0.03			3.18963	0.02							5.21688	0.03
4.72103	0			3.18963	0							5.21688	0
4.72706	0			3.19392	0							5.22382	0
4.72706	0.03			3.19392	0.02							5.22382	0.01
4.73309	0.03			3.19821	0.02							5.23077	0.01
4.73309	0			3.19821	0							5.23077	0
4.73912	0			3.64	0							5.23772	0
4.73912	0.03			3.64	0.02							5.23772	0.01
4.74515	0.03			3.64429	0.02							5.24467	0.01
4.74515	0			3.64429	0							5.24467	0
4.75118	0			3.64858	0							5.25162	0
4.75118	0.03			3.64858	0.02							5.25162	0.01
4.75721	0.03			3.65287	0.02							5.25856	0.01
4.75721	0			3.65287	0							5.25856	0
4.76324	0			3.65716	0							5.26551	0
4.76324	0.03			3.65716	0.02							5.26551	0.01
4.76926	0.03			3.66145	0.02							5.27246	0.01
4.76926	0			3.66145	0							5.27246	0
4.77529	0			3.66574	0							5.27941	0
4.77529	0.03			3.66574	0.02							5.27941	0.01
4.78132	0.03			3.67002	0.02							5.28636	0.01
4.78132	0			3.67002	0							5.28636	0
4.78735	0			3.67431	0							5.2933	0
4.78735	0.03			3.67431	0.02							5.2933	0.01
4.79338	0.03			3.6786	0.02							5.30025	0.01
4.79338	0			3.6786	0							5.30025	0
4.79941	0			3.68289	0							5.3072	0
4.79941	0.03			3.68289	0.02							5.3072	0.01
4.80544	0.03			3.68718	0.02							5.31415	0.01
4.80544	0			3.68718	0							5.31415	0
4.81147	0			3.69147	0							5.32109	0
4.81147	0.03			3.69147	0.02							5.32109	0.01
4.8175	0.03			3.69576	0.02							5.32804	0.01
4.8175	0			3.69576	0							5.32804	0
4.82353	0			3.70005	0							5.33499	0
4.82353	0.03			3.70005	0.02							5.33499	0.01
4.82956	0.03			3.70434	0.02							5.34194	0.01
4.82956	0			3.70434	0							5.34194	0
4.83559	0			3.70863	0							5.34889	0
4.83559	0.03			3.70863	0.02							5.34889	0.01
4.84162	0.03			3.71292	0.02							5.35583	0.01
4.84162	0			3.71292	0							5.35583	0
4.84765	0			3.71721	0							5.36278	0
4.84765	0.03			3.71721	0.02							5.36278	0.01
4.85368	0.03			3.7215	0.02							5.36973	0.01
4.85368	0			3.7215	0							5.36973	0
4.85971	0			3.72578	0							5.37668	0
4.85971	0.03			3.72578	0.02							5.37668	0.01
4.86574	0.03			3.73007	0.02							5.38363	0.01
4.86574	0			3.73007	0							5.38363	0
4.87176	0			3.73436	0							5.39057	0
4.87176	0.03			3.73436	0.02							5.39057	0.01
4.87779	0.03			3.73865	0.02							5.39752	0.01
4.87779	0			3.73865	0							5.39752	0
4.88382	0			3.74294	0							5.40447	0
4.88382	0.03			3.74294	0.02							5.40447	0.01
4.88985	0.03			3.74723	0.02							5.41142	0.01
4.88985	0			3.74723	0							5.41142	0
4.89588	0			3.75152	0							5.41837	0
4.89588	0.03			3.75152	0.02							5.41837	0.01
4.90191	0.03			3.75581	0.02							5.42531	0.01
4.90191	0			3.75581	0							5.42531	0
4.90794	0			3.7601	0							5.43226	0
4.90794	0.03			3.7601	0.02							5.43226	0.01
4.91397	0.03			3.76439	0.02							5.43921	0.01
4.91397	0			3.76439	0							5.43921	0
4.92	0			3.76868	0							5.44616	0
4.92	0.03			3.76868	0.02							5.44616	0.01
4.92603	0.03			3.77297	0.02							5.4531	0.01
4.92603	0			3.77297	0							5.4531	0
4.93206	0			3.77725	0							5.46005	0
4.93206	0.03			3.77725	0.02							5.46005	0.01
4.93809	0.03			3.78154	0.02							5.467	0.01
4.93809	0			3.78154	0							5.467	0
4.94412	0			3.78583	0							5.47395	0
4.94412	0.03			3.78583	0.02							5.47395	0.01
4.95015	0.03			3.79012	0.02							5.4809	0.01
4.95015	0			3.79012	0							5.4809	0
4.95618	0			3.79441	0							5.48784	0
4.95618	0.03			3.79441	0.02							5.48784	0.01
4.96221	0.03			3.7987	0.02							5.49479	0.01
4.96221	0			3.7987	0							5.49479	0
4.96824	0			3.80299	0							5.50174	0
4.96824	0.03			3.80299	0.02							5.50174	0.01
4.97426	0.03			3.80728	0.02							5.50869	0.01
4.97426	0			3.80728	0							5.50869	0
4.98029	0			3.81157	0							5.51564	0
4.98029	0.03			3.81157	0.02							5.51564	0.01
4.98632	0.03			3.81586	0.02							5.52258	0.01
4.98632	0			3.81586	0							5.52258	0
4.99235	0			3.82015	0							5.52953	0
4.99235	0.03			3.82015	0.02							5.52953	0.01
4.99838	0.03			3.82444	0.02							5.53648	0.01
4.99838	0			3.82444	0							5.53648	0
5.00441	0			3.82873	0							5.54343	0
5.00441	0.03			3.82873	0.02							5.54343	0.01
5.01044	0.03			3.83301	0.02							5.55037	0.01
5.01044	0			3.83301	0							5.55037	0
5.01647	0			3.8373	0							5.55732	0
5.01647	0.03			3.8373	0.02							5.55732	0.01
5.0225	0.03			3.84159	0.02							5.56427	0.01
5.0225	0			3.84159	0							5.56427	0
5.02853	0			3.84588	0							5.57122	0
5.02853	0.03			3.84588	0.02							5.57122	0.01
5.03456	0.03			3.85017	0.02							5.57817	0.01
5.03456	0			3.85017	0							5.57817	0
5.04059	0			3.85446	0							5.58511	0
5.04059	0.03			3.85446	0.02							5.58511	0.01
5.04662	0.03			3.85875	0.02							5.59206	0.01
5.04662	0			3.85875	0							5.59206	0
5.05265	0			3.86304	0							5.59901	0
5.05265	0.03			3.86304	0.02							5.59901	0.01
5.05868	0.03			3.86733	0.02							5.60596	0.01
5.05868	0			3.86733	0							5.60596	0
5.06471	0			3.87162	0							5.61291	0
5.06471	0.03			3.87162	0.02							5.61291	0.01
5.07074	0.03			3.87591	0.02							5.61985	0.01
5.07074	0			3.87591	0							5.61985	0
5.07676	0			3.8802	0							5.6268	0
5.07676	0.03			3.8802	0.02							5.6268	0.01
5.08279	0.03			3.88449	0.02							5.63375	0.01
5.08279	0			3.88449	0							5.63375	0
5.08882	0			3.88877	0							5.6407	0
5.08882	0.03			3.88877	0.02							5.6407	0.01
5.09485	0.03			3.89306	0.02							5.64765	0.01
5.09485	0			3.89306	0							5.64765	0
5.10088	0			3.89735	0							5.65459	0
5.10088	0.03			3.89735	0.02							5.65459	0.01
5.10691	0.03			3.90164	0.02							5.66154	0.01
5.10691	0			3.90164	0							5.66154	0
5.11294	0			3.90593	0							5.66849	0
5.11294	0.03			3.90593	0.02							5.66849	0.01
5.11897	0.03			3.91022	0.02							5.67544	0.01
5.11897	0			3.91022	0							5.67544	0
5.125	0			3.91451	0							5.68238	0
5.125	0.03			3.91451	0.02							5.68238	0.01
5.13103	0.03			3.9188	0.02							5.68933	0.01
5.13103	0			3.9188	0							5.68933	0
5.13706	0			3.92309	0							5.69628	0
5.13706	0.03			3.92309	0.02							5.69628	0.01
5.14309	0.03			3.92738	0.02							5.70323	0.01
5.14309	0			3.92738	0							5.70323	0
5.14912	0			3.93167	0							5.71018	0
5.14912	0.03			3.93167	0.02							5.71018	0.01
5.15515	0.03			3.93596	0.02							5.71712	0.01
5.15515	0			3.93596	0							5.71712	0
5.16118	0			3.94025	0							5.72407	0
5.16118	0.03			3.94025	0.02							5.72407	0.01
5.16721	0.03			3.94453	0.02							5.73102	0.01
5.16721	0			3.94453	0							5.73102	0
5.17324	0			3.94882	0							5.73797	0
5.17324	0.03			3.94882	0.02							5.73797	0.01
5.17926	0.03			3.95311	0.02							5.74492	0.01
5.17926	0			3.95311	0							5.74492	0
5.18529	0			3.9574	0							5.75186	0
5.18529	0.03			3.9574	0.02							5.75186	0.01
5.19132	0.03			3.96169	0.02							5.75881	0.01
5.19132	0			3.96169	0							5.75881	0
5.19735	0			3.96598	0							5.76576	0
5.19735	0.03			3.96598	0.02							5.76576	0.01
5.20338	0.03			3.97027	0.02							5.77271	0.01
5.20338	0			3.97027	0							5.77271	0
5.20941	0			3.97456	0							5.77965	0
5.20941	0.03			3.97456	0.02							5.77965	0.01
5.21544	0.03			3.97885	0.02							5.7866	0.01
5.21544	0			3.97885	0							5.7866	0
5.22147	0			3.98314	0							5.79355	0
5.22147	0.03			3.98314	0.02							5.79355	0.01
5.2275	0.03			3.98743	0.02							5.8005	0.01
5.2275	0			3.98743	0							5.8005	0
5.23353	0			3.99172	0							5.80745	0
5.23353	0.03			3.99172	0.02							5.80745	0.01
5.23956	0.03			3.996	0.02							5.81439	0.01
5.23956	0			3.996	0							5.81439	0
5.24559	0			4.00029	0							5.82134	0
5.24559	0.03			4.00029	0.02							5.82134	0.01
5.25162	0.03			4.00458	0.02							5.82829	0.01
5.25162	0			4.00458	0							5.82829	0
5.25765	0			4.00887	0							5.83524	0
5.25765	0.03			4.00887	0.02							5.83524	0.01
5.26368	0.03			4.01316	0.02							5.84219	0.01
5.26368	0			4.01316	0							5.84219	0
5.26971	0			4.01745	0							5.84913	0
5.26971	0.03			4.01745	0.02							5.84913	0.01
5.27574	0.03			4.02174	0.02							5.85608	0.01
5.27574	0			4.02174	0							5.85608	0
5.28176	0			4.02603	0							5.86303	0
5.28176	0.03			4.02603	0.02							5.86303	0.01
5.28779	0.03			4.03032	0.02							5.86998	0.01
5.28779	0			4.03032	0							5.86998	0
5.29382	0			4.03461	0							5.87693	0
5.29382	0.03			4.03461	0.02							5.87693	0.01
5.29985	0.03			4.0389	0.02							5.88387	0.01
5.29985	0			4.0389	0							5.88387	0
5.30588	0			4.04319	0							5.89082	0
5.30588	0.03			4.04319	0.02							5.89082	0.01
5.31191	0.03			4.04748	0.02							5.89777	0.01
5.31191	0			4.04748	0							5.89777	0
5.31794	0			4.05176	0							5.90472	0
5.31794	0.03			4.05176	0.02							5.90472	0.01
5.32397	0.03			4.05605	0.02							5.91166	0.01
5.32397	0			4.05605	0							5.91166	0
5.33	0			4.06034	0							7.30819	0
5.33	0.05			4.06034	0.02							7.30819	0.02
5.33603	0.05			4.06463	0.02							7.31514	0.02
5.33603	0			4.06463	0							7.31514	0
5.34206	0			4.06892	0							7.32208	0
5.34206	0.05			4.06892	0.02							7.32208	0.02
5.34809	0.05			4.07321	0.02							7.32903	0.02
5.34809	0			4.07321	0							7.32903	0
5.35412	0			4.0775	0							7.33598	0
5.35412	0.05			4.0775	0.02							7.33598	0.02
5.36015	0.05			4.08187	0.02							7.34293	0.02
5.36015	0			4.08187	0							7.34293	0
5.36618	0			4.08625	0							7.34987	0
5.36618	0.05			4.08625	0.02							7.34987	0.02
5.37221	0.05			4.09062	0.02							7.35682	0.02
5.37221	0			4.09062	0							7.35682	0
5.37824	0			4.095	0							7.36377	0
5.37824	0.05			4.095	0.02							7.36377	0.02
5.38426	0.05			4.09937	0.02							7.37072	0.02
5.38426	0			4.09937	0							7.37072	0
5.39029	0			4.10375	0							7.37767	0
5.39029	0.05			4.10375	0.02							7.37767	0.02
5.39632	0.05			4.10812	0.02							7.38461	0.02
5.39632	0			4.10812	0							7.38461	0
5.40235	0			4.1125	0							7.39156	0
5.40235	0.05			4.1125	0.02							7.39156	0.02
5.40838	0.05			4.11687	0.02							7.39851	0.02
5.40838	0			4.11687	0							7.39851	0
5.41441	0			4.12125	0							7.40546	0
5.41441	0.05			4.12125	0.02							7.40546	0.02
5.42044	0.05			4.12562	0.02							7.41241	0.02
5.42044	0			4.12562	0							7.41241	0
5.42647	0			4.13	0							7.41935	0
5.42647	0.05			4.13	0.02							7.41935	0.02
5.4325	0.05			4.13437	0.02							7.4263	0.02
5.4325	0			4.13437	0							7.4263	0
5.43853	0			4.13875	0							7.43325	0
5.43853	0.05			4.13875	0.02							7.43325	0.02
5.44456	0.05			4.14312	0.02							7.4402	0.02
5.44456	0			4.14312	0							7.4402	0
5.45059	0			4.1475	0							7.44714	0
5.45059	0.05			4.1475	0.02							7.44714	0.02
5.45662	0.05			4.15187	0.02							7.45409	0.02
5.45662	0			4.15187	0							7.45409	0
5.46265	0			4.15625	0							7.46104	0
5.46265	0.05			4.15625	0.02							7.46104	0.02
5.46868	0.05			4.16062	0.02							7.46799	0.02
5.46868	0			4.16062	0							7.46799	0
5.47471	0			4.165	0							7.47494	0
5.47471	0.05			4.165	0.02							7.47494	0.02
5.48074	0.05			4.16937	0.02							7.48188	0.02
5.48074	0			4.16937	0							7.48188	0
5.48676	0			4.17375	0							7.48883	0
5.48676	0.05			4.17375	0.02							7.48883	0.02
5.49279	0.05			4.17812	0.02							7.49578	0.02
5.49279	0			4.17812	0							7.49578	0
5.49882	0			4.1825	0							7.50273	0
5.49882	0.05			4.1825	0.02							7.50273	0.02
5.50485	0.05			4.18687	0.02							7.50968	0.02
5.50485	0			4.18687	0							7.50968	0
5.51088	0			4.19125	0							7.51662	0
5.51088	0.05			4.19125	0.02							7.51662	0.02
5.51691	0.05			4.19562	0.02							7.52357	0.02
5.51691	0			4.19562	0							7.52357	0
5.52294	0			4.2	0							7.53052	0
5.52294	0.05			4.2	0.02							7.53052	0.02
5.52897	0.05			4.20437	0.02							7.53747	0.02
5.52897	0			4.20437	0							7.53747	0
5.535	0			4.20875	0							7.54442	0
5.535	0.05			4.20875	0.02							7.54442	0.02
5.54103	0.05			4.21312	0.02							7.55136	0.02
5.54103	0			4.21312	0							7.55136	0
5.54706	0			4.2175	0							7.55831	0
5.54706	0.05			4.2175	0.02							7.55831	0.02
5.55309	0.05			4.22187	0.02							7.56526	0.02
5.55309	0			4.22187	0							7.56526	0
5.55912	0			4.22625	0							7.57221	0
5.55912	0.05			4.22625	0.02							7.57221	0.02
5.56515	0.05			4.23062	0.02							7.57915	0.02
5.56515	0			4.23062	0							7.57915	0
5.57118	0			4.235	0							7.5861	0
5.57118	0.05			4.235	0.02							7.5861	0.02
5.57721	0.05			4.23937	0.02							7.59305	0.02
5.57721	0			4.23937	0							7.59305	0
5.58324	0			4.24375	0							7.6	0
5.58324	0.05			4.24375	0.02							7.6	0.02
5.58926	0.05			4.24812	0.02							7.60695	0.02
5.58926	0			4.24812	0							7.60695	0
5.59529	0			4.2525	0							7.61389	0
5.59529	0.05			4.2525	0.02							7.61389	0.02
5.60132	0.05			4.25687	0.02							7.62084	0.02
5.60132	0			4.25687	0							7.62084	0
5.60735	0			4.26125	0							7.62779	0
5.60735	0.05			4.26125	0.02							7.62779	0.02
5.61338	0.05			4.26562	0.02							7.63474	0.02
5.61338	0			4.26562	0							7.63474	0
5.61941	0			4.27	0							7.64169	0
5.61941	0.05			4.27	0.02							7.64169	0.02
5.62544	0.05			4.27437	0.02							7.64863	0.02
5.62544	0			4.27437	0							7.64863	0
5.63147	0			4.27875	0							7.65558	0
5.63147	0.05			4.27875	0.02							7.65558	0.02
5.6375	0.05			4.28312	0.02							7.66253	0.02
5.6375	0			4.28312	0							7.66253	0
5.64353	0			4.2875	0							7.66948	0
5.64353	0.05			4.2875	0.02							7.66948	0.02
5.64956	0.05			4.29187	0.02							7.67642	0.02
5.64956	0			4.29187	0							7.67642	0
5.65559	0			4.29625	0							7.68337	0
5.65559	0.05			4.29625	0.02							7.68337	0.02
5.66162	0.05			4.30062	0.02							7.69032	0.02
5.66162	0			4.30062	0							7.69032	0
5.66765	0			4.305	0							7.69727	0
5.66765	0.05			4.305	0.02							7.69727	0.02
5.67368	0.05			4.30937	0.02							7.70422	0.02
5.67368	0			4.30937	0							7.70422	0
5.67971	0			4.31375	0							7.71116	0
5.67971	0.05			4.31375	0.02							7.71116	0.02
5.68574	0.05			4.31812	0.02							7.71811	0.02
5.68574	0			4.31812	0							7.71811	0
5.69176	0			4.3225	0							7.72506	0
5.69176	0.05			4.3225	0.02							7.72506	0.02
5.69779	0.05			4.32687	0.02							7.73201	0.02
5.69779	0			4.32687	0							7.73201	0
5.70382	0			4.33125	0							7.73896	0
5.70382	0.05			4.33125	0.02							7.73896	0.02
5.70985	0.05			4.33562	0.02							7.7459	0.02
5.70985	0			4.33562	0							7.7459	0
5.71588	0			4.34	0							7.75285	0
5.71588	0.05			4.34	0.02							7.75285	0.02
5.72191	0.05			4.34437	0.02							7.7598	0.02
5.72191	0			4.34437	0							7.7598	0
5.72794	0			4.34875	0							7.76675	0
5.72794	0.05			4.34875	0.02							7.76675	0.02
5.73397	0.05			4.35312	0.02							7.7737	0.02
5.73397	0			4.35312	0							7.7737	0
5.74	0			4.3575	0							7.78064	0
5.74	0.05			4.3575	0.02							7.78064	0.02
5.74603	0.05			4.36187	0.02							7.78759	0.02
5.74603	0			4.36187	0							7.78759	0
5.75206	0			4.36625	0							7.79454	0
5.75206	0.05			4.36625	0.02							7.79454	0.02
5.75809	0.05			4.37062	0.02							7.80149	0.02
5.75809	0			4.37062	0							7.80149	0
5.76412	0			4.375	0							7.80843	0
5.76412	0.05			4.375	0.02							7.80843	0.02
5.77015	0.05			4.37937	0.02							7.81538	0.02
5.77015	0			4.37937	0							7.81538	0
5.77618	0			4.38375	0							7.82233	0
5.77618	0.05			4.38375	0.02							7.82233	0.02
5.78221	0.05			4.38812	0.02							7.82928	0.02
5.78221	0			4.38812	0							7.82928	0
5.78824	0			4.3925	0							7.83623	0
5.78824	0.05			4.3925	0.02							7.83623	0.02
5.79426	0.05			4.39687	0.02							7.84317	0.02
5.79426	0			4.39687	0							7.84317	0
5.80029	0			4.40125	0							7.85012	0
5.80029	0.05			4.40125	0.02							7.85012	0.02
5.80632	0.05			4.40562	0.02							7.85707	0.02
5.80632	0			4.40562	0							7.85707	0
5.81235	0			4.41	0							7.86402	0
5.81235	0.05			4.41	0.02							7.86402	0.02
5.81838	0.05			4.41437	0.02							7.87097	0.02
5.81838	0			4.41437	0							7.87097	0
5.82441	0			4.41875	0							7.87791	0
5.82441	0.05			4.41875	0.02							7.87791	0.02
5.83044	0.05			4.42312	0.02							7.88486	0.02
5.83044	0			4.42312	0							7.88486	0
5.83647	0			4.4275	0							7.89181	0
5.83647	0.05			4.4275	0.02							7.89181	0.02
5.8425	0.05			4.43187	0.02							7.89876	0.02
5.8425	0			4.43187	0							7.89876	0
5.84853	0			4.43625	0							7.9057	0
5.84853	0.05			4.43625	0.02							7.9057	0.02
5.85456	0.05			4.44062	0.02							7.91265	0.02
5.85456	0			4.44062	0							7.91265	0
5.86059	0			4.445	0							7.9196	0
5.86059	0.05			4.445	0.02							7.9196	0.02
5.86662	0.05			4.44937	0.02							7.92655	0.02
5.86662	0			4.44937	0							7.92655	0
5.87265	0			4.45375	0							7.9335	0
5.87265	0.05			4.45375	0.02							7.9335	0.02
5.87868	0.05			4.45812	0.02							7.94044	0.02
5.87868	0			4.45812	0							7.94044	0
5.88471	0			4.4625	0							7.94739	0
5.88471	0.05			4.4625	0.02							7.94739	0.02
5.89074	0.05			4.46687	0.02							7.95434	0.02
5.89074	0			4.46687	0							7.95434	0
5.89676	0			4.47125	0							7.96129	0
5.89676	0.05			4.47125	0.02							7.96129	0.02
5.90279	0.05			4.47562	0.02							7.96824	0.02
5.90279	0			4.47562	0							7.96824	0
5.90882	0			4.48	0							7.97518	0
5.90882	0.05			4.48	0.02							7.97518	0.02
5.91485	0.05			4.48437	0.02							7.98213	0.02
5.91485	0			4.48437	0							7.98213	0
5.92088	0			4.48875	0							7.98908	0
5.92088	0.05			4.48875	0.02							7.98908	0.02
5.92691	0.05			4.49312	0.02							7.99603	0.02
5.92691	0			4.49312	0							7.99603	0
5.93294	0			4.4975	0							8.69776	0
5.93294	0.05			4.4975	0.02							8.69776	0.03
5.93897	0.05			4.50187	0.02							8.70471	0.03
5.93897	0			4.50187	0							8.70471	0
5.945	0			4.50625	0							8.71166	0
5.945	0.03			4.50625	0.02							8.71166	0.03
5.95103	0.03			4.51062	0.02							8.71861	0.03
5.95103	0			4.51062	0							8.71861	0
5.95706	0			5.39	0							8.72555	0
5.95706	0.03			5.39	0.01							8.72555	0.03
5.96309	0.03			5.39429	0.01							8.7325	0.03
5.96309	0			5.39429	0							8.7325	0
5.96912	0			5.39858	0							8.73945	0
5.96912	0.03			5.39858	0.01							8.73945	0.03
5.97515	0.03			5.40287	0.01							8.7464	0.03
5.97515	0			5.40287	0							8.7464	0
5.98118	0			5.40716	0							8.75335	0
5.98118	0.03			5.40716	0.01							8.75335	0.03
5.98721	0.03			5.41145	0.01							8.76029	0.03
5.98721	0			5.41145	0							8.76029	0
5.99324	0			5.41574	0							8.76724	0
5.99324	0.03			5.41574	0.01							8.76724	0.03
5.99926	0.03			5.42002	0.01							8.77419	0.03
5.99926	0			5.42002	0							8.77419	0
6.00529	0			5.42431	0							8.78114	0
6.00529	0.03			5.42431	0.01							8.78114	0.03
6.01132	0.03			5.4286	0.01							8.78808	0.03
6.01132	0			5.4286	0							8.78808	0
6.01735	0			5.43289	0							8.79503	0
6.01735	0.03			5.43289	0.01							8.79503	0.03
6.02338	0.03			5.43718	0.01							8.80198	0.03
6.02338	0			5.43718	0							8.80198	0
6.02941	0			5.44147	0							8.80893	0
6.02941	0.03			5.44147	0.01							8.80893	0.03
6.03544	0.03			5.44576	0.01							8.81588	0.03
6.03544	0			5.44576	0							8.81588	0
6.04147	0			5.45005	0							8.82282	0
6.04147	0.03			5.45005	0.01							8.82282	0.03
6.0475	0.03			5.45434	0.01							8.82977	0.03
6.0475	0			5.45434	0							8.82977	0
6.05353	0			5.45863	0							8.83672	0
6.05353	0.03			5.45863	0.01							8.83672	0.03
6.05956	0.03			5.46292	0.01							8.84367	0.03
6.05956	0			5.46292	0							8.84367	0
6.06559	0			5.46721	0							8.85062	0
6.06559	0.03			5.46721	0.01							8.85062	0.03
6.07162	0.03			5.4715	0.01							8.85756	0.03
6.07162	0			5.4715	0							8.85756	0
6.07765	0			5.47578	0							8.86451	0
6.07765	0.03			5.47578	0.01							8.86451	0.03
6.08368	0.03			5.48007	0.01							8.87146	0.03
6.08368	0			5.48007	0							8.87146	0
6.08971	0			5.48436	0							8.87841	0
6.08971	0.03			5.48436	0.01							8.87841	0.03
6.09574	0.03			5.48865	0.01							8.88536	0.03
6.09574	0			5.48865	0							8.88536	0
6.10176	0			5.49294	0							8.8923	0
6.10176	0.03			5.49294	0.01							8.8923	0.03
6.10779	0.03			5.49723	0.01							8.89925	0.03
6.10779	0			5.49723	0							8.89925	0
6.11382	0			5.50152	0							8.9062	0
6.11382	0.03			5.50152	0.01							8.9062	0.03
6.11985	0.03			5.50581	0.01							8.91315	0.03
6.11985	0			5.50581	0							8.91315	0
6.12588	0			5.5101	0							8.92009	0
6.12588	0.03			5.5101	0.01							8.92009	0.03
6.13191	0.03			5.51439	0.01							8.92704	0.03
6.13191	0			5.51439	0							8.92704	0
6.13794	0			5.51868	0							8.93399	0
6.13794	0.03			5.51868	0.01							8.93399	0.03
6.14397	0.03			5.52297	0.01							8.94094	0.03
6.14397	0			5.52297	0							8.94094	0
6.15	0			5.52725	0							8.94789	0
6.15	0.03			5.52725	0.01							8.94789	0.03
6.15603	0.03			5.53154	0.01							8.95483	0.03
6.15603	0			5.53154	0							8.95483	0
6.16206	0			5.53583	0							8.96178	0
6.16206	0.03			5.53583	0.01							8.96178	0.03
6.16809	0.03			5.54012	0.01							8.96873	0.03
6.16809	0			5.54012	0							8.96873	0
6.17412	0			5.54441	0							8.97568	0
6.17412	0.03			5.54441	0.01							8.97568	0.03
6.18015	0.03			5.5487	0.01							8.98263	0.03
6.18015	0			5.5487	0							8.98263	0
6.18618	0			5.55299	0							8.98957	0
6.18618	0.03			5.55299	0.01							8.98957	0.03
6.19221	0.03			5.55728	0.01							8.99652	0.03
6.19221	0			5.55728	0							8.99652	0
6.19824	0			5.56157	0							9.00347	0
6.19824	0.03			5.56157	0.01							9.00347	0.03
6.20426	0.03			5.56586	0.01							9.01042	0.03
6.20426	0			5.56586	0							9.01042	0
6.21029	0			5.57015	0							9.01736	0
6.21029	0.03			5.57015	0.01							9.01736	0.03
6.21632	0.03			5.57444	0.01							9.02431	0.03
6.21632	0			5.57444	0							9.02431	0
6.22235	0			5.57873	0							9.03126	0
6.22235	0.03			5.57873	0.01							9.03126	0.03
6.22838	0.03			5.58301	0.01							9.03821	0.03
6.22838	0			5.58301	0							9.03821	0
6.23441	0			5.5873	0							9.04516	0
6.23441	0.03			5.5873	0.01							9.04516	0.03
6.24044	0.03			5.59159	0.01							9.0521	0.03
6.24044	0			5.59159	0							9.0521	0
6.24647	0			5.59588	0							9.05905	0
6.24647	0.03			5.59588	0.01							9.05905	0.03
6.2525	0.03			5.60017	0.01							9.066	0.03
6.2525	0			5.60017	0							9.066	0
6.25853	0			5.60446	0							9.07295	0
6.25853	0.03			5.60446	0.01							9.07295	0.03
6.26456	0.03			5.60875	0.01							9.0799	0.03
6.26456	0			5.60875	0							9.0799	0
6.27059	0			5.61304	0							9.08684	0
6.27059	0.03			5.61304	0.01							9.08684	0.03
6.27662	0.03			5.61733	0.01							9.09379	0.03
6.27662	0			5.61733	0							9.09379	0
6.28265	0			5.62162	0							9.10074	0
6.28265	0.03			5.62162	0.01							9.10074	0.03
6.28868	0.03			5.62591	0.01							9.10769	0.03
6.28868	0			5.62591	0							9.10769	0
6.29471	0			5.6302	0							9.11463	0
6.29471	0.03			5.6302	0.01							9.11463	0.03
6.30074	0.03			5.63449	0.01							9.12158	0.03
6.30074	0			5.63449	0							9.12158	0
6.30676	0			5.63877	0							9.12853	0
6.30676	0.03			5.63877	0.01							9.12853	0.03
6.31279	0.03			5.64306	0.01							9.13548	0.03
6.31279	0			5.64306	0							9.13548	0
6.31882	0			5.64735	0							9.14243	0
6.31882	0.03			5.64735	0.01							9.14243	0.03
6.32485	0.03			5.65164	0.01							9.14937	0.03
6.32485	0			5.65164	0							9.14937	0
6.33088	0			5.65593	0							9.15632	0
6.33088	0.03			5.65593	0.01							9.15632	0.03
6.33691	0.03			5.66022	0.01							9.16327	0.03
6.33691	0			5.66022	0							9.16327	0
6.34294	0			5.66451	0							9.17022	0
6.34294	0.03			5.66451	0.01							9.17022	0.03
6.34897	0.03			5.6688	0.01							9.17717	0.03
6.34897	0			5.6688	0							9.17717	0
6.355	0			5.67309	0							9.18411	0
6.355	0.03			5.67309	0.01							9.18411	0.03
6.36103	0.03			5.67738	0.01							9.19106	0.03
6.36103	0			5.67738	0							9.19106	0
6.36706	0			5.68167	0							9.19801	0
6.36706	0.03			5.68167	0.01							9.19801	0.03
6.37309	0.03			5.68596	0.01							9.20496	0.03
6.37309	0			5.68596	0							9.20496	0
6.37912	0			5.69025	0							9.21191	0
6.37912	0.03			5.69025	0.01							9.21191	0.03
6.38515	0.03			5.69453	0.01							9.21885	0.03
6.38515	0			5.69453	0							9.21885	0
6.39118	0			5.69882	0							9.2258	0
6.39118	0.03			5.69882	0.01							9.2258	0.03
6.39721	0.03			5.70311	0.01							9.23275	0.03
6.39721	0			5.70311	0							9.23275	0
6.40324	0			5.7074	0							9.2397	0
6.40324	0.03			5.7074	0.01							9.2397	0.03
6.40926	0.03			5.71169	0.01							9.24664	0.03
6.40926	0			5.71169	0							9.24664	0
6.41529	0			5.71598	0							9.25359	0
6.41529	0.03			5.71598	0.01							9.25359	0.03
6.42132	0.03			5.72027	0.01							9.26054	0.03
6.42132	0			5.72027	0							9.26054	0
6.42735	0			5.72456	0							9.26749	0
6.42735	0.03			5.72456	0.01							9.26749	0.03
6.43338	0.03			5.72885	0.01							9.27444	0.03
6.43338	0			5.72885	0							9.27444	0
6.43941	0			5.73314	0							9.28138	0
6.43941	0.03			5.73314	0.01							9.28138	0.03
6.44544	0.03			5.73743	0.01							9.28833	0.03
6.44544	0			5.73743	0							9.28833	0
6.45147	0			5.74172	0							9.29528	0
6.45147	0.03			5.74172	0.01							9.29528	0.03
6.4575	0.03			5.746	0.01							9.30223	0.03
6.4575	0			5.746	0							9.30223	0
6.46353	0			5.75029	0							9.30918	0
6.46353	0.03			5.75029	0.01							9.30918	0.03
6.46956	0.03			5.75458	0.01							9.31612	0.03
6.46956	0			5.75458	0							9.31612	0
6.47559	0			5.75887	0							9.32307	0
6.47559	0.03			5.75887	0.01							9.32307	0.03
6.48162	0.03			5.76316	0.01							9.33002	0.03
6.48162	0			5.76316	0							9.33002	0
[truncated: 1,240 more rows]

## Sheet: Data merging
	Dae				SEM 200x			SEM 2,000x			STEM 25,000x						Merged dataset
	SEM 200x	SEM 2,000x	STEM 25,000x		L	w	L/w	L	w	L/w	L	w	L/w				L	w	L/w	Dae
Mean	12.6687	2.50686	0.292055	Mean	15.2482	6.2208	3.32145	2.9273	1.2977	3.00774	0.311128	0.152253	2.29625	Mean			6.68557	2.64915	3.16791	5.5373
σn-1	9.53252	2.06996	0.214368	σn-1	10.4571	5.16262	2.70095	2.30431	1.23403	3.49515	0.280686	0.113004	1.98301	σn-1			10.1323	4.59788	3.21289	8.82124
Max.	58.9141	13.2561	1.15044	Max.	59.56	28.49	16.1414	11.71	8.79	33.1304	1.932	0.538	17.2253	Max.			59.56	28.49	33.1304	58.9141
Min.	2.16437	0.360312	0.0395973	Min.	2.39	0.99	1.01938	0.41	0.14	1.01869	0.0473	0.0177	1.05859	Min.			0.0473	0.0177	1.01869	0.0395973
	Dae				SEM 200x			SEM 2,000x			STEM 25,000x			0.3333	0.2083	0.1435	Merged dataset
	SEM 200x	SEM 2,000x	STEM 25,000x	Merged dataset (Dae)	L	w	L/w	L	w	L/w	L	w	L/w	P1	P2	P3	L	w	L/w	Dae
	58.9141			58.9141	59.56	28.49	2.09056										59.56	28.49	2.09056	58.9141
	41.5027			41.5027	36.59	21.97	1.66545										36.59	21.97	1.66545	41.5027
	39.3875			39.3875	35.55	20.47	1.73669										35.55	20.47	1.73669	39.3875
	36.2397			36.2397	31.72	19.3	1.64352										31.72	19.3	1.64352	36.2397
	34.8285			34.8285	43.02	15.36	2.80078										43.02	15.36	2.80078	34.8285
	33.449			33.449	26.33	20.32	1.29577										26.33	20.32	1.29577	33.449
	27.1407			27.1407	22.65	15.13	1.49703										22.65	15.13	1.49703	27.1407
	26.3651			26.3651	28.45	12.33	2.30738										28.45	12.33	2.30738	26.3651
	26.0789			26.0789	20.51	20.12	1.01938										20.51	20.12	1.01938	26.0789
	25.4431			25.4431	21.35	14.1	1.51418										21.35	14.1	1.51418	25.4431
	24.0899			24.0899	24.95	11.5	2.16957										24.95	11.5	2.16957	24.0899
	22.4856			22.4856	23.06	10.79	2.13716										23.06	10.79	2.13716	22.4856
	21.1867			21.1867	33.3	8.6	3.87209							x	x		33.3	8.6	3.87209	21.1867
	20.5917			20.5917	23.03	9.47	2.43189										23.03	9.47	2.43189	20.5917
	19.1239			19.1239	33.53	7.52	4.45878							x	x		33.53	7.52	4.45878	19.1239
	18.9543			18.9543	32.81	7.48	4.38636							x	x		32.81	7.48	4.38636	18.9543
	18.7256			18.7256	18.99	9.04	2.10066										18.99	9.04	2.10066	18.7256
	18.6068			18.6068	28.78	7.59	3.79183							x	x		28.78	7.59	3.79183	18.6068
	17.8874			17.8874	14.85	10.03	1.48056										14.85	10.03	1.48056	17.8874
	17.5793			17.5793	19.32	8.15	2.37055										19.32	8.15	2.37055	17.5793
	17.5382			17.5382	17.93	8.43	2.12693										17.93	8.43	2.12693	17.5382
	17.2806			17.2806	19.42	7.93	2.44893										19.42	7.93	2.44893	17.2806
	16.6455			16.6455	14.74	8.78	1.67882										14.74	8.78	1.67882	16.6455
	16.6265			16.6265	14.94	8.67	1.72318										14.94	8.67	1.72318	16.6265
	16.4874			16.4874	12.97	10.03	1.29312										12.97	10.03	1.29312	16.4874
	15.796			15.796	12.35	9.75	1.26667										12.35	9.75	1.26667	15.796
	15.7893			15.7893	12.43	9.59	1.29614										12.43	9.59	1.29614	15.7893
	15.7637			15.7637	13.75	8.42	1.63302										13.75	8.42	1.63302	15.7637
	15.0938			15.0938	18.62	6.66	2.7958										18.62	6.66	2.7958	15.0938
	14.4624			14.4624	12.91	7.58	1.70317										12.91	7.58	1.70317	14.4624
	14.2679			14.2679	56.52	4.7	12.0255							x	x		56.52	4.7	12.0255	14.2679
	14.1679			14.1679	13.17	7.21	1.82663										13.17	7.21	1.82663	14.1679
	14.1641			14.1641	25.32	5.54	4.5704							x	x		25.32	5.54	4.5704	14.1641
	13.8705			13.8705	10.7	8.97	1.19287										10.7	8.97	1.19287	13.8705
	13.8365			13.8365	15.13	6.43	2.35303										15.13	6.43	2.35303	13.8365
	13.8102			13.8102	10.82	8.48	1.27594										10.82	8.48	1.27594	13.8102
	13.4734			13.4734	13.88	6.45	2.15194	L	w	L/w							13.88	6.45	2.15194	13.4734
	13.1336	13.2561		13.1948	12.92	6.45	2.0031	10.19	8.79	1.15927							10.19	8.79	1.15927	13.1948
	12.4908	8.98777		10.7393	12.48	6.08	2.05263	8.89	4.4	2.02045							8.89	4.4	2.02045	10.7393
	12.1758	8.81055		10.4932	10.03	6.89	1.45573	11.71	3.78	3.09788				x	x		11.71	3.78	3.09788	10.4932
	12.1751	8.75718		10.4661	22.67	4.71	4.81316	8.27	4.41	1.87528				x	x		22.67	4.71	4.81316	10.4661
	11.9921	7.36894		9.6805	9.53	7.15	1.33287	6.85	3.75	1.82667							6.85	3.75	1.82667	9.6805
	11.9649	7.35764		9.66128	10.07	6.61	1.52345	5.77	5.63	1.02487							5.77	5.63	1.02487	9.66128
	11.934	5.28436		8.60919	16.4	5.06	3.24111	4.91	2.69	1.82528				x	x		16.4	5.06	3.24111	8.60919
	11.9033	5.02617		8.46474	15.3	5.17	2.95938	8.45	2	4.225				x	x	x	8.45	2	4.225	8.46474
	11.8981	4.88343		8.39078	20.37	4.71	4.32484	3.78	3.11	1.21543				x	x		20.37	4.71	4.32484	8.39078
	11.6498	4.55695		8.10338	10.67	5.99	1.7813	3.79	2.55	1.48627							3.79	2.55	1.48627	8.10338
	11.0968	4.26908		7.68294	11.36	5.33	2.13133	3.5	2.43	1.44033							3.5	2.43	1.44033	7.68294
	10.7557	4.2563		7.50598	9.43	5.72	1.6486	5.99	1.79	3.34637				x	x	x	5.99	1.79	3.34637	7.50598
	10.5617	4.10378		7.33273	12.19	4.79	2.54489	3.19	3.05	1.0459							3.19	3.05	1.0459	7.33273
	10.1434	4.01734		7.0804	18.78	3.93	4.77863	4.48	1.85	2.42162				x	x		18.78	3.93	4.77863	7.0804
	9.95347	3.96321		6.95834	8.62	5.35	1.61121	3.49	2.1	1.6619							3.49	2.1	1.6619	6.95834
	9.93638	3.94655		6.94147	10.66	4.66	2.28755	7.29	1.53	4.76471				x	x	x	7.29	1.53	4.76471	6.94147
	9.87067	3.80589		6.83828	28.53	3.45	8.26957	5.68	1.57	3.61783				x	x	x	5.68	1.57	3.61783	6.83828
	9.65089	3.70267		6.67678	8.87	4.95	1.79192	5.99	1.49	4.02013				x	x	x	5.99	1.49	4.02013	6.67678
	9.24211	3.55518		6.39865	8.6	4.7	1.82979	3.33	1.8	1.85							3.33	1.8	1.85	6.39865
	9.04456	3.47745		6.261	7.99	4.78	1.67155	3.01	1.87	1.60963							3.01	1.87	1.60963	6.261
	8.80539	3.23517		6.02028	14.86	3.5	4.24571	5.01	1.32	3.79				x	x	x	5.01	1.32	3.79	6.02028
	8.62285	3.22895		5.9259	18.23	3.23	5.64396	2.91	1.68	1.73214				x	x		18.23	3.23	5.64396	5.9259
	8.40325	3.1487		5.77597	8.03	4.2	1.9119	2.79	1.66	1.68072							2.79	1.66	1.68072	5.77597
	8.09334	3.07143		5.58239	11.63	3.38	3.44083	2.72	1.62	1.67901				x	x		11.63	3.38	3.44083	5.58239
	7.82094	3.03318		5.42706	6.78	4.2	1.61429	7.08	1.11	6.37838				x	x	x	7.08	1.11	6.37838	5.42706
	7.71806	3.0285		5.37328	8.91	3.5	2.54571	3.71	1.34	2.76866							3.71	1.34	2.76866	5.37328
	7.60187	3.0283		5.31509	6.84	3.96	1.72727	4.75	1.23	3.86179				x			4.75	1.23	3.86179	5.31509
	7.40371	3.02619		5.21495	6.02	4.26	1.41315	2.37	1.86	1.27419							2.37	1.86	1.27419	5.21495
	6.99124	2.92893		4.96008	6.52	3.55	1.83662	5.51	1.13	4.87611				x	x	x	5.51	1.13	4.87611	4.96008
	6.91384	2.74013		4.82699	12.43	2.7	4.6037	2.15	2.1	1.02381				x	x	x	12.43	2.7	4.6037	4.82699
	6.72101	2.67345		4.69723	6.05	3.5	1.72857	5.93	0.99	5.9899				x	x	x	5.93	0.99	5.9899	4.69723
	6.67094	2.64972		4.66033	7.15	3.13	2.28435	2.13	1.55	1.37419							2.13	1.55	1.37419	4.66033
	6.36439	2.6255		4.49495	19.9	2.19	9.08676	2.02	1.85	1.09189				x	x	x	19.9	2.19	9.08676	4.49495
	6.33041	2.53853		4.43447	18	2.22	8.10811	2.02	1.51	1.33775				x	x	x	18	2.22	8.10811	4.43447
	6.22281	2.49026		4.35653	11.91	2.39	4.98326	2.12	1.36	1.55882				x	x	x	11.91	2.39	4.98326	4.35653
	6.12201	2.47744		4.29972	5.34	3.27	1.63303	2	1.44	1.38889							2	1.44	1.38889	4.29972
	5.83162	2.31386		4.07274	5.65	2.89	1.95502	2.05	1.22	1.68033							2.05	1.22	1.68033	4.07274
	5.65964	2.29085		3.97525	7.34	2.45	2.99592	5.59	0.83	6.73494				x	x	x	5.59	0.83	6.73494	3.97525
	5.48306	2.22918		3.85612	5.02	2.82	1.78014	1.72	1.44	1.19444							1.72	1.44	1.19444	3.85612
	5.43203	2.21414		3.82308	6.75	2.39	2.82427	1.74	1.35	1.28889							1.74	1.35	1.28889	3.82308
	5.39312	2.20683		3.79997	5.14	2.7	1.9037	1.7	1.57	1.0828							1.7	1.57	1.0828	3.79997
	5.30118	2.11265		3.70691	10.67	2.01	5.30846	1.88	1.11	1.69369				x	x	x	10.67	2.01	5.30846	3.70691
	5.24297	2.09623		3.6696	7.53	2.19	3.43836	3.44	0.84	4.09524				x	x	x	7.53	2.19	3.43836	3.6696
	5.18362	2.0833		3.63346	8.2	2.1	3.90476	3.22	0.85	3.78824				x	x	x	8.2	2.1	3.90476	3.63346
	5.1793	2.07694		3.62812	9.53	2.01	4.74129	1.83	1.1	1.66364				x	x	x	9.53	2.01	4.74129	3.62812
	5.10265	2.06902		3.58584	10.82	1.91	5.66492	2.27	0.96	2.36458				x	x	x	10.82	1.91	5.66492	3.58584
	4.94054	2.04884		3.49469	12.69	1.77	7.16949	1.94	1.03	1.8835				x	x	x	12.69	1.77	7.16949	3.49469
	4.84806	2.04403		3.44604	19	1.6	11.875	2.61	0.89	2.93258				x	x	x	19	1.6	11.875	3.44604
	4.7303	2.0407		3.3855	6.46	2.01	3.21393	3.79	0.79	4.79747				x	x	x	6.46	2.01	3.21393	3.3855
	4.62665	2.0073		3.31697	5.33	2.1	2.5381	1.87	1.02	1.83333							1.87	1.02	1.83333	3.31697
	4.58515	1.98925		3.2872	6.64	1.91	3.47644	1.76	1.05	1.67619				x	x	x	6.64	1.91	3.47644	3.2872
	4.49688	1.98342		3.24015	4.26	2.26	1.88496	6.32	0.68	9.29412				x	x	x	6.32	0.68	9.29412	3.24015
	4.30561	1.94451		3.12506	9.41	1.6	5.88125	1.57	1.13	1.38938				x	x	x	9.41	1.6	5.88125	3.12506
	3.94188	1.88436		2.91312	4.09	1.88	2.17553	1.47	1.17	1.25641							1.47	1.17	1.25641	2.91312
	3.93978	1.86727		2.90353	6.59	1.57	4.19745	2.79	0.77	3.62338				x	x	x	6.59	1.57	4.19745	2.90353
	3.86985	1.82273		2.84629	3.88	1.88	2.06383	2.44	0.78	3.12821				x			2.44	0.78	3.12821	2.84629
	3.70764	1.79167		2.74965	12.91	1.25	10.328	2.37	0.77	3.07792				x	x	x	12.91	1.25	10.328	2.74965
	3.67996	1.73235		2.70616	12.31	1.25	9.848	1.44	0.97	1.48454				x	x	x	12.31	1.25	9.848	2.70616
	3.65266	1.70864		2.68065	11.75	1.25	9.4	1.35	1.03	1.31068				x	x	x	11.75	1.25	9.4	2.68065
	3.46555	1.64554		2.55555	4.01	1.57	2.55414	1.58	0.82	1.92683							1.58	0.82	1.92683	2.55555
	3.13404	1.63544		2.38474	15.98	0.99	16.1414	2.28	0.69	3.30435				x	x	x	15.98	0.99	16.1414	2.38474
	2.93841	1.55602		2.24722	2.39	1.69	1.4142	1.48	0.78	1.89744							1.48	0.78	1.89744	2.24722
	2.16437	1.5386		1.85148	2.45	0.99	2.47475	2.62	0.61	4.29508				x			2.62	0.61	4.29508	1.85148
		1.53064		1.53064				1.42	0.78	1.82051							1.42	0.78	1.82051	1.53064
		1.52316		1.52316				1.17	1.02	1.14706							1.17	1.02	1.14706	1.52316
		1.51095		1.51095				1.46	0.75	1.94667							1.46	0.75	1.94667	1.51095
		1.46228		1.46228				3.04	0.55	5.52727				x			3.04	0.55	5.52727	1.46228
		1.44093		1.44093				1.82	0.63	2.88889							1.82	0.63	2.88889	1.44093
		1.42827		1.42827				1.41	0.7	2.01429							1.41	0.7	2.01429	1.42827
		1.38543		1.38543				1.09	1.07	1.01869							1.09	1.07	1.01869	1.38543
		1.38057		1.38057				1.06	0.94	1.12766							1.06	0.94	1.12766	1.38057
		1.36473		1.36473				1.14	0.76	1.5							1.14	0.76	1.5	1.36473
		1.32843		1.32843				1.02	0.9	1.13333							1.02	0.9	1.13333	1.32843
		1.2781		1.2781				1.12	0.68	1.64706							1.12	0.68	1.64706	1.2781
		1.25366		1.25366				1.16	0.64	1.8125							1.16	0.64	1.8125	1.25366
		1.24701		1.24701				1.54	0.55	2.8							1.54	0.55	2.8	1.24701
		1.21911		1.21911				0.96	0.74	1.2973							0.96	0.74	1.2973	1.21911
		1.2032		1.2032				3.5	0.42	8.33333				x			3.5	0.42	8.33333	1.2032
		1.16097		1.16097				1.32	0.53	2.49057	L	w	L/w				1.32	0.53	2.49057	1.16097
		1.14672	1.15044	1.14858				1.22	0.54	2.25926	1.2415	0.538	2.30762				1.2415	0.538	2.30762	1.14858
		1.11539	0.961883	1.03864				1.47	0.48	3.0625	1.932	0.3649	5.2946	x			1.932	0.3649	5.2946	1.03864
		1.09316	0.921864	1.00751				1.14	0.52	2.19231	0.7741	0.5105	1.51636				0.7741	0.5105	1.51636	1.00751
		1.03044	0.914023	0.972231				0.97	0.52	1.86538	1.0167	0.4214	2.41267				1.0167	0.4214	2.41267	0.972231
		1.01983	0.76601	0.892921				1.53	0.42	3.64286	0.6092	0.4561	1.33567	x			1.53	0.42	3.64286	0.892921
		0.991161	0.697248	0.844204				1.04	0.47	2.21277	0.9127	0.3008	3.03424	x			0.9127	0.3008	3.03424	0.844204
		0.98351	0.636193	0.809852				1.84	0.38	4.84211	0.4894	0.4477	1.09314	x			1.84	0.38	4.84211	0.809852
		0.927754	0.624018	0.775886				1.14	0.41	2.78049	0.7071	0.2853	2.47844				0.7071	0.2853	2.47844	0.775886
		0.884322	0.616084	0.750203				2.17	0.32	6.78125	0.561	0.3181	1.7636	x			2.17	0.32	6.78125	0.750203
		0.819679	0.613722	0.7167				0.68	0.46	1.47826	0.4752	0.4489	1.05859				0.4752	0.4489	1.05859	0.7167
		0.796135	0.585875	0.691005				7.62	0.23	33.1304	0.5065	0.3154	1.6059	x	x	x	7.62	0.23	33.1304	0.691005
		0.769259	0.56469	0.666974				1.39	0.3	4.63333	0.5839	0.2698	2.1642	x			1.39	0.3	4.63333	0.666974
		0.75711	0.534901	0.646005				1.05	0.32	3.28125	0.4324	0.3103	1.39349	x			1.05	0.32	3.28125	0.646005
		0.687885	0.489717	0.588801				0.53	0.49	1.08163	0.4063	0.2748	1.47853				0.4063	0.2748	1.47853	0.588801
		0.65426	0.485889	0.570075				0.52	0.39	1.33333	0.3918	0.2829	1.38494				0.3918	0.2829	1.38494	0.570075
		0.641246	0.476531	0.558888				1.16	0.25	4.64	0.3661	0.3183	1.15017	x			1.16	0.25	4.64	0.558888
		0.640669	0.47196	0.556315				1.63	0.23	7.08696	0.413	0.2514	1.6428	x			1.63	0.23	7.08696	0.556315
		0.496391	0.453124	0.474758				0.41	0.28	1.46429	0.4469	0.2222	2.01125				0.4469	0.2222	2.01125	0.474758
		0.48476	0.42943	0.457095				0.86	0.19	4.52632	0.8283	0.1646	5.0322	x			0.8283	0.1646	5.0322	0.457095
		0.423891	0.426156	0.425023				0.58	0.18	3.22222	0.3448	0.2469	1.39652	x			0.58	0.18	3.22222	0.425023
		0.360312	0.404945	0.382628				0.66	0.14	4.71429	0.3141	0.2559	1.22743	x			0.66	0.14	4.71429	0.382628
			0.396312	0.396312							0.3595	0.2052	1.75195				0.3595	0.2052	1.75195	0.396312
			0.389347	0.389347							0.6378	0.1561	4.08584	x			0.6378	0.1561	4.08584	0.389347
			0.381935	0.381935							0.4329	0.1746	2.47938				0.4329	0.1746	2.47938	0.381935
			0.380979	0.380979							0.3834	0.1847	2.0758				0.3834	0.1847	2.0758	0.380979
			0.363766	0.363766							0.3061	0.201	1.52289				0.3061	0.201	1.52289	0.363766
			0.350239	0.350239							0.3905	0.1613	2.42095				0.3905	0.1613	2.42095	0.350239
			0.349109	0.349109							0.3436	0.1714	2.00467				0.3436	0.1714	2.00467	0.349109
			0.34611	0.34611							0.282	0.1986	1.41994				0.282	0.1986	1.41994	0.34611
			0.341262	0.341262							0.2933	0.1847	1.58798				0.2933	0.1847	1.58798	0.341262
			0.329055	0.329055							0.3463	0.1558	2.22272				0.3463	0.1558	2.22272	0.329055
			0.320447	0.320447							0.2561	0.1892	1.35359				0.2561	0.1892	1.35359	0.320447
			0.317792	0.317792							0.268	0.1752	1.52968				0.268	0.1752	1.52968	0.317792
			0.317215	0.317215							0.3258	0.1521	2.14201				0.3258	0.1521	2.14201	0.317215
			0.30005	0.30005							0.264	0.1591	1.65933				0.264	0.1591	1.65933	0.30005
			0.298077	0.298077							0.2539	0.1627	1.56054				0.2539	0.1627	1.56054	0.298077
			0.298015	0.298015							0.2438	0.1701	1.43327				0.2438	0.1701	1.43327	0.298015
			0.29612	0.29612							0.3311	0.1362	2.43098				0.3311	0.1362	2.43098	0.29612
			0.294	0.294							0.2466	0.163	1.51288				0.2466	0.163	1.51288	0.294
			0.289053	0.289053							0.324	0.1328	2.43976				0.324	0.1328	2.43976	0.289053
			0.281329	0.281329							0.2299	0.1608	1.42973				0.2299	0.1608	1.42973	0.281329
			0.271324	0.271324							0.4456	0.1087	4.09936	x			0.4456	0.1087	4.09936	0.271324
			0.268795	0.268795							0.2896	0.1258	2.30207				0.2896	0.1258	2.30207	0.268795
			0.265467	0.265467							0.2218	0.1478	1.50068				0.2218	0.1478	1.50068	0.265467
			0.253154	0.253154							0.2113	0.1411	1.49752				0.2113	0.1411	1.49752	0.253154
			0.252262	0.252262							0.277	0.117	2.36752				0.277	0.117	2.36752	0.252262
			0.237233	0.237233							0.1848	0.1479	1.24949				0.1848	0.1479	1.24949	0.237233
			0.22397	0.22397							0.1884	0.1238	1.52181				0.1884	0.1238	1.52181	0.22397
			0.222779	0.222779							0.5533	0.0804	6.88184	x			0.5533	0.0804	6.88184	0.222779
			0.222652	0.222652							0.1726	0.141	1.22411				0.1726	0.141	1.22411	0.222652
			0.2205	0.2205							0.1856	0.1218	1.52381				0.1856	0.1218	1.52381	0.2205
			0.219748	0.219748							0.1924	0.117	1.64444				0.1924	0.117	1.64444	0.219748
			0.213412	0.213412							0.1746	0.1218	1.4335				0.1746	0.1218	1.4335	0.213412
			0.212063	0.212063							0.2142	0.1026	2.08772				0.2142	0.1026	2.08772	0.212063
			0.208681	0.208681							0.162	0.1315	1.23194				0.162	0.1315	1.23194	0.208681
			0.207219	0.207219							0.1665	0.1213	1.37263				0.1665	0.1213	1.37263	0.207219
			0.199835	0.199835							0.1957	0.0984	1.98882				0.1957	0.0984	1.98882	0.199835
			0.199055	0.199055							0.2906	0.0827	3.51391	x			0.2906	0.0827	3.51391	0.199055
			0.198079	0.198079							0.1551	0.1218	1.2734				0.1551	0.1218	1.2734	0.198079
			0.197402	0.197402							0.281	0.0827	3.39782	x			0.281	0.0827	3.39782	0.197402
			0.190668	0.190668							0.201	0.0902	2.22838				0.201	0.0902	2.22838	0.190668
			0.184272	0.184272							0.9939	0.0577	17.2253	x			0.9939	0.0577	17.2253	0.184272
			0.180344	0.180344							0.1385	0.1213	1.1418				0.1385	0.1213	1.1418	0.180344
			0.179493	0.179493							0.1667	0.0914	1.82385				0.1667	0.0914	1.82385	0.179493
			0.176116	0.176116							0.1622	0.0902	1.79823				0.1622	0.0902	1.79823	0.176116
			0.174687	0.174687							0.1385	0.1046	1.32409				0.1385	0.1046	1.32409	0.174687
			0.174346	0.174346							0.574	0.0594	9.6633	x			0.574	0.0594	9.6633	0.174346
			0.172178	0.172178							0.1322	0.1168	1.13185				0.1322	0.1168	1.13185	0.172178
			0.170377	0.170377							0.1936	0.0778	2.48843				0.1936	0.0778	2.48843	0.170377
			0.167975	0.167975							0.129	0.113	1.14159				0.129	0.113	1.14159	0.167975
			0.161062	0.161062							0.1478	0.0827	1.78718				0.1478	0.0827	1.78718	0.161062
			0.159891	0.159891							0.1423	0.084	1.69405				0.1423	0.084	1.69405	0.159891
			0.158327	0.158327							0.3396	0.0591	5.74619	x			0.3396	0.0591	5.74619	0.158327
			0.14916	0.14916							0.123	0.0843	1.45907				0.123	0.0843	1.45907	0.14916
			0.147386	0.147386							0.1137	0.0953	1.19307				0.1137	0.0953	1.19307	0.147386
			0.14503	0.14503							0.123	0.0795	1.54717				0.123	0.0795	1.54717	0.14503
			0.138951	0.138951							0.1848	0.0596	3.10067	x			0.1848	0.0596	3.10067	0.138951
			0.136482	0.136482							0.142	0.065	2.18462				0.142	0.065	2.18462	0.136482
			0.132671	0.132671							0.1108	0.0739	1.49932				0.1108	0.0739	1.49932	0.132671
			0.129929	0.129929							0.1052	0.0752	1.39894				0.1052	0.0752	1.39894	0.129929
			0.123226	0.123226							0.1265	0.0591	2.14044				0.1265	0.0591	2.14044	0.123226
			0.112752	0.112752							0.089	0.0681	1.3069				0.089	0.0681	1.3069	0.112752
			0.110198	0.110198							0.1032	0.0558	1.84946				0.1032	0.0558	1.84946	0.110198
			0.109324	0.109324							0.1104	0.0529	2.08696				0.1104	0.0529	2.08696	0.109324
			0.108302	0.108302							0.0918	0.0594	1.54545				0.0918	0.0594	1.54545	0.108302
			0.106405	0.106405							0.1156	0.0496	2.33065				0.1156	0.0496	2.33065	0.106405
			0.102946	0.102946							0.1218	0.0462	2.63636				0.1218	0.0462	2.63636	0.102946
			0.0980363	0.0980363							0.1553	0.0397	3.91184	x			0.1553	0.0397	3.91184	0.0980363
			0.0979302	0.0979302							0.1839	0.0378	4.86508	x			0.1839	0.0378	4.86508	0.0979302
			0.0958319	0.0958319							0.1128	0.0431	2.61717				0.1128	0.0431	2.61717	0.0958319
			0.0922614	0.0922614							0.0879	0.0462	1.9026				0.0879	0.0462	1.9026	0.0922614
			0.0920128	0.0920128							0.0843	0.0473	1.78224				0.0843	0.0473	1.78224	0.0920128
			0.0849789	0.0849789							0.0653	0.0591	1.10491				0.0653	0.0591	1.10491	0.0849789
			0.0825387	0.0825387							0.0752	0.0426	1.76526				0.0752	0.0426	1.76526	0.0825387
			0.0812684	0.0812684							0.0887	0.0378	2.34656				0.0887	0.0378	2.34656	0.0812684
			0.0777164	0.0777164							0.0609	0.0477	1.27673				0.0609	0.0477	1.27673	0.0777164
			0.0763669	0.0763669							0.0689	0.0397	1.73552				0.0689	0.0397	1.73552	0.0763669
			0.0745881	0.0745881							0.0777	0.0355	2.18873				0.0777	0.0355	2.18873	0.0745881
			0.0513031	0.0513031							0.0508	0.0251	2.0239				0.0508	0.0251	2.0239	0.0513031
			0.0395973	0.0395973							0.0473	0.0177	2.67232				0.0473	0.0177	2.67232	0.0395973

## Sheet: Histogram1_HID
0.0395973	0	0.0395973	0
0.0395973	0.583333	0.0395973	0.583333
0.0689476	0.583333	3.03332	0.583333
0.0689476	0	3.03332	0
0.0982978	0	3.03332	0.152778
0.0982978	0.583333	6.02705	0.152778
0.127648	0.583333	6.02705	0
0.127648	0	6.02705	0.0648148
0.156998	0	9.02077	0.0648148
0.156998	0.583333	9.02077	0
0.186349	0.583333	9.02077	0.0231481
0.186349	0	12.0145	0.0231481
0.215699	0	12.0145	0
0.215699	0.583333	12.0145	0.0416667
0.245049	0.583333	15.0082	0.0416667
0.245049	0	15.0082	0
0.274399	0	15.0082	0.0509259
0.274399	0.583333	18.0019	0.0509259
0.303749	0.583333	18.0019	0
0.303749	0	18.0019	0.0231481
0.3331	0	20.9957	0.0231481
0.3331	0.583333	20.9957	0
0.36245	0.583333	20.9957	0.00925926
0.36245	0	23.9894	0.00925926
0.3918	0	23.9894	0
0.3918	0.583333	23.9894	0.0185185
0.42115	0.583333	26.9831	0.0185185
0.42115	0	26.9831	0
0.450501	0	26.9831	0.00462963
0.450501	0.583333	29.9768	0.00462963
0.479851	0.583333	29.9768	0
0.479851	0	29.9768	0
0.509201	0	32.9706	0
0.509201	0.583333	32.9706	0
0.538551	0.583333	32.9706	0.00925926
0.538551	0	35.9643	0.00925926
0.567902	0	35.9643	0
0.567902	0.583333	35.9643	0.00462963
0.597252	0.583333	38.958	0.00462963
0.597252	0	38.958	0
0.626602	0	38.958	0.00925926
0.626602	0.583333	41.9517	0.00925926
0.655952	0.583333	41.9517	0
0.655952	0	41.9517	0
0.685303	0	44.9455	0
0.685303	0.583333	44.9455	0
0.714653	0.583333	44.9455	0
0.714653	0	47.9392	0
0.744003	0	47.9392	0
0.744003	0.583333	47.9392	0
0.773353	0.583333	50.9329	0
0.773353	0	50.9329	0
0.802704	0	50.9329	0
0.802704	0.583333	53.9266	0
0.832054	0.583333	53.9266	0
0.832054	0	53.9266	0
0.861404	0	56.9204	0
0.861404	0.583333	56.9204	0
0.890754	0.583333	56.9204	0.00462963
0.890754	0	59.9141	0.00462963
0.920104	0	59.9141	0
0.920104	0.583333
0.949455	0.583333
0.949455	0
0.978805	0
0.978805	0.583333
1.00816	0.583333
1.00816	0
1.03751	0
1.03751	0.583333
1.06686	0.583333
1.06686	0
1.09621	0
1.09621	0.583333
1.12556	0.583333
1.12556	0
1.15491	0
1.15491	0.583333
1.18426	0.583333
1.18426	0
1.21361	0
1.21361	0.583333
1.24296	0.583333
1.24296	0
1.27231	0
1.27231	0.583333
1.30166	0.583333
1.30166	0
1.33101	0
1.33101	0.583333
1.36036	0.583333
1.36036	0
1.38971	0
1.38971	0.583333
1.41906	0.583333
1.41906	0
1.44841	0
1.44841	0.583333
1.47776	0.583333
1.47776	0
1.50711	0
1.50711	0.583333
1.53646	0.583333
1.53646	0
1.56581	0
1.56581	0.583333
1.59516	0.583333
1.59516	0
1.62451	0
1.62451	0.583333
1.65386	0.583333
1.65386	0
1.68321	0
1.68321	0.583333
1.71256	0.583333
1.71256	0
1.74191	0
1.74191	0.583333
1.77126	0.583333
1.77126	0
1.80061	0
1.80061	0.583333
1.82996	0.583333
1.82996	0
1.85931	0
1.85931	0.583333
1.88866	0.583333
1.88866	0
1.91801	0
1.91801	0.583333
1.94736	0.583333
1.94736	0
1.97671	0
1.97671	0.583333
2.00606	0.583333
2.00606	0
2.03541	0
2.03541	0.583333
2.06476	0.583333
2.06476	0
2.09411	0
2.09411	0.583333
2.12346	0.583333
2.12346	0
2.15281	0
2.15281	0.583333
2.18216	0.583333
2.18216	0
2.21152	0
2.21152	0.583333
2.24087	0.583333
2.24087	0
2.27022	0
2.27022	0.583333
2.29957	0.583333
2.29957	0
2.32892	0
2.32892	0.583333
2.35827	0.583333
2.35827	0
2.38762	0
2.38762	0.583333
2.41697	0.583333
2.41697	0
2.44632	0
2.44632	0.583333
2.47567	0.583333
2.47567	0
2.50502	0
2.50502	0.583333
2.53437	0.583333
2.53437	0
2.56372	0
2.56372	0.583333
2.59307	0.583333
2.59307	0
2.62242	0
2.62242	0.583333
2.65177	0.583333
2.65177	0
2.68112	0
2.68112	0.583333
2.71047	0.583333
2.71047	0
2.73982	0
2.73982	0.583333
2.76917	0.583333
2.76917	0
2.79852	0
2.79852	0.583333
2.82787	0.583333
2.82787	0
2.85722	0
2.85722	0.583333
2.88657	0.583333
2.88657	0
2.91592	0
2.91592	0.583333
2.94527	0.583333
2.94527	0
2.97462	0
2.97462	0.583333
3.00397	0.583333
3.00397	0
3.03332	0
3.03332	0.152778
3.06267	0.152778
3.06267	0
3.09202	0
3.09202	0.152778
3.12137	0.152778
3.12137	0
3.15072	0
3.15072	0.152778
3.18007	0.152778
3.18007	0
3.20942	0
3.20942	0.152778
3.23877	0.152778
3.23877	0
3.26812	0
3.26812	0.152778
3.29747	0.152778
3.29747	0
3.32682	0
3.32682	0.152778
3.35617	0.152778
3.35617	0
3.38552	0
3.38552	0.152778
3.41487	0.152778
3.41487	0
3.44423	0
3.44423	0.152778
3.47358	0.152778
3.47358	0
3.50293	0
3.50293	0.152778
3.53228	0.152778
3.53228	0
3.56163	0
3.56163	0.152778
3.59098	0.152778
3.59098	0
3.62033	0
3.62033	0.152778
3.64968	0.152778
3.64968	0
3.67903	0
3.67903	0.152778
3.70838	0.152778
3.70838	0
3.73773	0
3.73773	0.152778
3.76708	0.152778
3.76708	0
3.79643	0
3.79643	0.152778
3.82578	0.152778
3.82578	0
3.85513	0
3.85513	0.152778
3.88448	0.152778
3.88448	0
3.91383	0
3.91383	0.152778
3.94318	0.152778
3.94318	0
3.97253	0
3.97253	0.152778
4.00188	0.152778
4.00188	0
4.03123	0
4.03123	0.152778
4.06058	0.152778
4.06058	0
4.08993	0
4.08993	0.152778
4.11928	0.152778
4.11928	0
4.14863	0
4.14863	0.152778
4.17798	0.152778
4.17798	0
4.20733	0
4.20733	0.152778
4.23668	0.152778
4.23668	0
4.26603	0
4.26603	0.152778
4.29538	0.152778
4.29538	0
4.32473	0
4.32473	0.152778
4.35408	0.152778
4.35408	0
4.38343	0
4.38343	0.152778
4.41278	0.152778
4.41278	0
4.44213	0
4.44213	0.152778
4.47148	0.152778
4.47148	0
4.50083	0
4.50083	0.152778
4.53018	0.152778
4.53018	0
4.55953	0
4.55953	0.152778
4.58888	0.152778
4.58888	0
4.61823	0
4.61823	0.152778
4.64758	0.152778
4.64758	0
4.67694	0
4.67694	0.152778
4.70629	0.152778
4.70629	0
4.73564	0
4.73564	0.152778
4.76499	0.152778
4.76499	0
4.79434	0
4.79434	0.152778
4.82369	0.152778
4.82369	0
4.85304	0
4.85304	0.152778
4.88239	0.152778
4.88239	0
4.91174	0
4.91174	0.152778
4.94109	0.152778
4.94109	0
4.97044	0
4.97044	0.152778
4.99979	0.152778
4.99979	0
5.02914	0
5.02914	0.152778
5.05849	0.152778
5.05849	0
5.08784	0
5.08784	0.152778
5.11719	0.152778
5.11719	0
5.14654	0
5.14654	0.152778
5.17589	0.152778
5.17589	0
5.20524	0
5.20524	0.152778
5.23459	0.152778
5.23459	0
5.26394	0
5.26394	0.152778
5.29329	0.152778
5.29329	0
5.32264	0
5.32264	0.152778
5.35199	0.152778
5.35199	0
5.38134	0
5.38134	0.152778
5.41069	0.152778
5.41069	0
5.44004	0
5.44004	0.152778
5.46939	0.152778
5.46939	0
5.49874	0
5.49874	0.152778
5.52809	0.152778
5.52809	0
5.55744	0
5.55744	0.152778
5.58679	0.152778
5.58679	0
5.61614	0
5.61614	0.152778
5.64549	0.152778
5.64549	0
5.67484	0
5.67484	0.152778
5.70419	0.152778
5.70419	0
5.73354	0
5.73354	0.152778
5.76289	0.152778
5.76289	0
5.79224	0
5.79224	0.152778
5.82159	0.152778
5.82159	0
5.85094	0
5.85094	0.152778
5.88029	0.152778
5.88029	0
5.90965	0
5.90965	0.152778
5.939	0.152778
5.939	0
5.96835	0
5.96835	0.152778
5.9977	0.152778
5.9977	0
6.02705	0
6.02705	0.0648148
6.0564	0.0648148
6.0564	0
6.08575	0
6.08575	0.0648148
6.1151	0.0648148
6.1151	0
6.14445	0
6.14445	0.0648148
6.1738	0.0648148
6.1738	0
6.20315	0
6.20315	0.0648148
6.2325	0.0648148
6.2325	0
6.26185	0
6.26185	0.0648148
6.2912	0.0648148
6.2912	0
6.32055	0
6.32055	0.0648148
6.3499	0.0648148
6.3499	0
6.37925	0
6.37925	0.0648148
6.4086	0.0648148
6.4086	0
6.43795	0
6.43795	0.0648148
6.4673	0.0648148
6.4673	0
6.49665	0
6.49665	0.0648148
6.526	0.0648148
6.526	0
6.55535	0
6.55535	0.0648148
6.5847	0.0648148
6.5847	0
6.61405	0
6.61405	0.0648148
6.6434	0.0648148
6.6434	0
6.67275	0
6.67275	0.0648148
6.7021	0.0648148
6.7021	0
6.73145	0
6.73145	0.0648148
6.7608	0.0648148
6.7608	0
6.79015	0
6.79015	0.0648148
6.8195	0.0648148
6.8195	0
6.84885	0
6.84885	0.0648148
6.8782	0.0648148
6.8782	0
6.90755	0
6.90755	0.0648148
6.9369	0.0648148
6.9369	0
6.96625	0
6.96625	0.0648148
6.9956	0.0648148
6.9956	0
7.02495	0
7.02495	0.0648148
7.0543	0.0648148
7.0543	0
7.08365	0
7.08365	0.0648148
7.113	0.0648148
7.113	0
7.14236	0
7.14236	0.0648148
7.17171	0.0648148
7.17171	0
7.20106	0
7.20106	0.0648148
7.23041	0.0648148
7.23041	0
7.25976	0
7.25976	0.0648148
7.28911	0.0648148
7.28911	0
7.31846	0
7.31846	0.0648148
7.34781	0.0648148
7.34781	0
7.37716	0
7.37716	0.0648148
7.40651	0.0648148
7.40651	0
7.43586	0
7.43586	0.0648148
7.46521	0.0648148
7.46521	0
7.49456	0
7.49456	0.0648148
7.52391	0.0648148
7.52391	0
7.55326	0
7.55326	0.0648148
7.58261	0.0648148
7.58261	0
7.61196	0
7.61196	0.0648148
7.64131	0.0648148
7.64131	0
7.67066	0
7.67066	0.0648148
7.70001	0.0648148
7.70001	0
7.72936	0
7.72936	0.0648148
7.75871	0.0648148
7.75871	0
7.78806	0
7.78806	0.0648148
7.81741	0.0648148
7.81741	0
7.84676	0
7.84676	0.0648148
7.87611	0.0648148
7.87611	0
7.90546	0
7.90546	0.0648148
7.93481	0.0648148
7.93481	0
7.96416	0
7.96416	0.0648148
7.99351	0.0648148
7.99351	0
8.02286	0
8.02286	0.0648148
8.05221	0.0648148
8.05221	0
8.08156	0
8.08156	0.0648148
8.11091	0.0648148
8.11091	0
8.14026	0
8.14026	0.0648148
8.16961	0.0648148
8.16961	0
8.19896	0
8.19896	0.0648148
8.22831	0.0648148
8.22831	0
8.25766	0
8.25766	0.0648148
8.28701	0.0648148
8.28701	0
8.31636	0
8.31636	0.0648148
8.34571	0.0648148
8.34571	0
8.37507	0
8.37507	0.0648148
8.40442	0.0648148
8.40442	0
8.43377	0
8.43377	0.0648148
8.46312	0.0648148
8.46312	0
8.49247	0
8.49247	0.0648148
8.52182	0.0648148
8.52182	0
8.55117	0
8.55117	0.0648148
8.58052	0.0648148
8.58052	0
8.60987	0
8.60987	0.0648148
8.63922	0.0648148
8.63922	0
8.66857	0
8.66857	0.0648148
8.69792	0.0648148
8.69792	0
8.72727	0
8.72727	0.0648148
8.75662	0.0648148
8.75662	0
8.78597	0
8.78597	0.0648148
8.81532	0.0648148
8.81532	0
8.84467	0
8.84467	0.0648148
8.87402	0.0648148
8.87402	0
8.90337	0
8.90337	0.0648148
8.93272	0.0648148
8.93272	0
8.96207	0
8.96207	0.0648148
8.99142	0.0648148
8.99142	0
9.02077	0
9.02077	0.0231481
9.05071	0.0231481
9.05071	0
9.08064	0
9.08064	0.0231481
9.11058	0.0231481
9.11058	0
9.14052	0
9.14052	0.0231481
9.17046	0.0231481
9.17046	0
9.20039	0
9.20039	0.0231481
9.23033	0.0231481
9.23033	0
9.26027	0
9.26027	0.0231481
9.29021	0.0231481
9.29021	0
9.32014	0
9.32014	0.0231481
9.35008	0.0231481
9.35008	0
9.38002	0
9.38002	0.0231481
9.40995	0.0231481
9.40995	0
9.43989	0
9.43989	0.0231481
9.46983	0.0231481
9.46983	0
9.49977	0
9.49977	0.0231481
9.5297	0.0231481
9.5297	0
9.55964	0
9.55964	0.0231481
9.58958	0.0231481
9.58958	0
9.61952	0
9.61952	0.0231481
9.64945	0.0231481
9.64945	0
9.67939	0
9.67939	0.0231481
9.70933	0.0231481
9.70933	0
9.73926	0
9.73926	0.0231481
9.7692	0.0231481
9.7692	0
9.79914	0
9.79914	0.0231481
9.82908	0.0231481
9.82908	0
9.85901	0
9.85901	0.0231481
9.88895	0.0231481
9.88895	0
9.91889	0
9.91889	0.0231481
9.94883	0.0231481
9.94883	0
9.97876	0
9.97876	0.0231481
10.0087	0.0231481
10.0087	0
10.0386	0
10.0386	0.0231481
10.0686	0.0231481
10.0686	0
10.0985	0
10.0985	0.0231481
10.1284	0.0231481
10.1284	0
10.1584	0
10.1584	0.0231481
10.1883	0.0231481
10.1883	0
10.2183	0
10.2183	0.0231481
10.2482	0.0231481
10.2482	0
10.2781	0
10.2781	0.0231481
10.3081	0.0231481
10.3081	0
10.338	0
10.338	0.0231481
10.3679	0.0231481
10.3679	0
10.3979	0
10.3979	0.0231481
10.4278	0.0231481
10.4278	0
10.4578	0
10.4578	0.0231481
10.4877	0.0231481
10.4877	0
10.5176	0
10.5176	0.0231481
10.5476	0.0231481
10.5476	0
10.5775	0
10.5775	0.0231481
10.6074	0.0231481
10.6074	0
10.6374	0
10.6374	0.0231481
10.6673	0.0231481
10.6673	0
10.6973	0
10.6973	0.0231481
10.7272	0.0231481
10.7272	0
10.7571	0
10.7571	0.0231481
10.7871	0.0231481
10.7871	0
10.817	0
10.817	0.0231481
10.8469	0.0231481
10.8469	0
10.8769	0
10.8769	0.0231481
10.9068	0.0231481
10.9068	0
10.9368	0
10.9368	0.0231481
10.9667	0.0231481
10.9667	0
10.9966	0
10.9966	0.0231481
11.0266	0.0231481
11.0266	0
11.0565	0
11.0565	0.0231481
11.0864	0.0231481
11.0864	0
11.1164	0
11.1164	0.0231481
11.1463	0.0231481
11.1463	0
11.1763	0
11.1763	0.0231481
11.2062	0.0231481
11.2062	0
11.2361	0
11.2361	0.0231481
11.2661	0.0231481
11.2661	0
11.296	0
11.296	0.0231481
11.3259	0.0231481
11.3259	0
11.3559	0
11.3559	0.0231481
11.3858	0.0231481
11.3858	0
11.4157	0
11.4157	0.0231481
11.4457	0.0231481
11.4457	0
11.4756	0
11.4756	0.0231481
11.5056	0.0231481
11.5056	0
11.5355	0
11.5355	0.0231481
11.5654	0.0231481
11.5654	0
11.5954	0
11.5954	0.0231481
11.6253	0.0231481
11.6253	0
11.6552	0
11.6552	0.0231481
11.6852	0.0231481
11.6852	0
11.7151	0
11.7151	0.0231481
11.7451	0.0231481
11.7451	0
11.775	0
11.775	0.0231481
11.8049	0.0231481
11.8049	0
11.8349	0
11.8349	0.0231481
11.8648	0.0231481
11.8648	0
11.8947	0
11.8947	0.0231481
11.9247	0.0231481
11.9247	0
11.9546	0
11.9546	0.0231481
11.9846	0.0231481
11.9846	0
12.0145	0
12.0145	0.0416667
12.0438	0.0416667
12.0438	0
12.0732	0
12.0732	0.0416667
12.1025	0.0416667
12.1025	0
12.1319	0
12.1319	0.0416667
12.1612	0.0416667
12.1612	0
12.1906	0
12.1906	0.0416667
12.2199	0.0416667
12.2199	0
12.2493	0
12.2493	0.0416667
12.2786	0.0416667
12.2786	0
12.308	0
12.308	0.0416667
12.3373	0.0416667
12.3373	0
12.3667	0
12.3667	0.0416667
12.396	0.0416667
12.396	0
12.4254	0
12.4254	0.0416667
12.4547	0.0416667
12.4547	0
12.4841	0
12.4841	0.0416667
12.5134	0.0416667
12.5134	0
12.5428	0
12.5428	0.0416667
12.5721	0.0416667
12.5721	0
12.6015	0
12.6015	0.0416667
12.6308	0.0416667
12.6308	0
12.6602	0
12.6602	0.0416667
12.6896	0.0416667
12.6896	0
12.7189	0
12.7189	0.0416667
12.7483	0.0416667
12.7483	0
12.7776	0
12.7776	0.0416667
12.807	0.0416667
12.807	0
12.8363	0
12.8363	0.0416667
12.8657	0.0416667
12.8657	0
12.895	0
12.895	0.0416667
12.9244	0.0416667
12.9244	0
12.9537	0
12.9537	0.0416667
12.9831	0.0416667
12.9831	0
13.0124	0
13.0124	0.0416667
13.0418	0.0416667
13.0418	0
13.0711	0
13.0711	0.0416667
13.1005	0.0416667
13.1005	0
13.1298	0
13.1298	0.0416667
13.1592	0.0416667
13.1592	0
13.1885	0
13.1885	0.0416667
13.2179	0.0416667
13.2179	0
13.2472	0
13.2472	0.0416667
13.2766	0.0416667
13.2766	0
13.3059	0
13.3059	0.0416667
13.3353	0.0416667
13.3353	0
13.3646	0
13.3646	0.0416667
13.394	0.0416667
13.394	0
13.4233	0
13.4233	0.0416667
13.4527	0.0416667
13.4527	0
13.482	0
13.482	0.0416667
13.5114	0.0416667
13.5114	0
13.5407	0
13.5407	0.0416667
13.5701	0.0416667
13.5701	0
13.5994	0
13.5994	0.0416667
13.6288	0.0416667
13.6288	0
13.6581	0
13.6581	0.0416667
13.6875	0.0416667
13.6875	0
13.7168	0
13.7168	0.0416667
13.7462	0.0416667
13.7462	0
13.7755	0
13.7755	0.0416667
13.8049	0.0416667
13.8049	0
13.8342	0
13.8342	0.0416667
13.8636	0.0416667
13.8636	0
13.8929	0
13.8929	0.0416667
13.9223	0.0416667
13.9223	0
13.9516	0
13.9516	0.0416667
13.981	0.0416667
13.981	0
14.0103	0
14.0103	0.0416667
14.0397	0.0416667
14.0397	0
14.069	0
14.069	0.0416667
14.0984	0.0416667
14.0984	0
14.1277	0
14.1277	0.0416667
14.1571	0.0416667
14.1571	0
14.1864	0
14.1864	0.0416667
14.2158	0.0416667
14.2158	0
14.2451	0
14.2451	0.0416667
14.2745	0.0416667
14.2745	0
14.3038	0
14.3038	0.0416667
14.3332	0.0416667
14.3332	0
14.3625	0
14.3625	0.0416667
14.3919	0.0416667
14.3919	0
14.4212	0
14.4212	0.0416667
14.4506	0.0416667
14.4506	0
14.4799	0
14.4799	0.0416667
14.5093	0.0416667
14.5093	0
14.5386	0
14.5386	0.0416667
14.568	0.0416667
14.568	0
14.5973	0
14.5973	0.0416667
14.6267	0.0416667
14.6267	0
14.656	0
14.656	0.0416667
14.6854	0.0416667
14.6854	0
14.7147	0
14.7147	0.0416667
14.7441	0.0416667
14.7441	0
14.7734	0
14.7734	0.0416667
14.8028	0.0416667
14.8028	0
14.8321	0
14.8321	0.0416667
14.8615	0.0416667
14.8615	0
14.8908	0
14.8908	0.0416667
14.9202	0.0416667
14.9202	0
14.9495	0
14.9495	0.0416667
14.9789	0.0416667
14.9789	0
15.0082	0
15.0082	0.0509259
15.0382	0.0509259
15.0382	0
15.0681	0
15.0681	0.0509259
15.098	0.0509259
15.098	0
15.128	0
15.128	0.0509259
15.1579	0.0509259
15.1579	0
15.1878	0
15.1878	0.0509259
15.2178	0.0509259
15.2178	0
15.2477	0
15.2477	0.0509259
15.2777	0.0509259
15.2777	0
15.3076	0
15.3076	0.0509259
15.3375	0.0509259
15.3375	0
15.3675	0
15.3675	0.0509259
15.3974	0.0509259
15.3974	0
15.4273	0
15.4273	0.0509259
15.4573	0.0509259
15.4573	0
15.4872	0
15.4872	0.0509259
15.5172	0.0509259
15.5172	0
15.5471	0
15.5471	0.0509259
15.577	0.0509259
15.577	0
15.607	0
15.607	0.0509259
15.6369	0.0509259
15.6369	0
15.6668	0
15.6668	0.0509259
15.6968	0.0509259
15.6968	0
15.7267	0
15.7267	0.0509259
15.7567	0.0509259
15.7567	0
15.7866	0
15.7866	0.0509259
15.8165	0.0509259
15.8165	0
15.8465	0
15.8465	0.0509259
15.8764	0.0509259
15.8764	0
15.9063	0
15.9063	0.0509259
15.9363	0.0509259
15.9363	0
15.9662	0
15.9662	0.0509259
15.9961	0.0509259
15.9961	0
16.0261	0
16.0261	0.0509259
16.056	0.0509259
16.056	0
16.086	0
16.086	0.0509259
16.1159	0.0509259
16.1159	0
16.1458	0
16.1458	0.0509259
16.1758	0.0509259
16.1758	0
16.2057	0
16.2057	0.0509259
16.2356	0.0509259
16.2356	0
16.2656	0
16.2656	0.0509259
16.2955	0.0509259
16.2955	0
16.3255	0
16.3255	0.0509259
16.3554	0.0509259
16.3554	0
16.3853	0
16.3853	0.0509259
16.4153	0.0509259
16.4153	0
16.4452	0
16.4452	0.0509259
16.4751	0.0509259
16.4751	0
16.5051	0
16.5051	0.0509259
16.535	0.0509259
16.535	0
16.565	0
16.565	0.0509259
16.5949	0.0509259
16.5949	0
16.6248	0
16.6248	0.0509259
16.6548	0.0509259
16.6548	0
16.6847	0
16.6847	0.0509259
16.7146	0.0509259
16.7146	0
16.7446	0
16.7446	0.0509259
16.7745	0.0509259
16.7745	0
16.8045	0
16.8045	0.0509259
16.8344	0.0509259
16.8344	0
16.8643	0
16.8643	0.0509259
16.8943	0.0509259
16.8943	0
16.9242	0
16.9242	0.0509259
16.9541	0.0509259
16.9541	0
16.9841	0
16.9841	0.0509259
17.014	0.0509259
17.014	0
17.044	0
17.044	0.0509259
17.0739	0.0509259
17.0739	0
17.1038	0
17.1038	0.0509259
17.1338	0.0509259
17.1338	0
17.1637	0
17.1637	0.0509259
17.1936	0.0509259
17.1936	0
17.2236	0
17.2236	0.0509259
17.2535	0.0509259
17.2535	0
17.2834	0
17.2834	0.0509259
17.3134	0.0509259
17.3134	0
17.3433	0
17.3433	0.0509259
17.3733	0.0509259
17.3733	0
17.4032	0
17.4032	0.0509259
17.4331	0.0509259
17.4331	0
17.4631	0
17.4631	0.0509259
17.493	0.0509259
17.493	0
17.5229	0
17.5229	0.0509259
17.5529	0.0509259
17.5529	0
17.5828	0
17.5828	0.0509259
17.6128	0.0509259
17.6128	0
17.6427	0
17.6427	0.0509259
17.6726	0.0509259
17.6726	0
17.7026	0
17.7026	0.0509259
17.7325	0.0509259
17.7325	0
17.7624	0
17.7624	0.0509259
17.7924	0.0509259
17.7924	0
17.8223	0
17.8223	0.0509259
17.8523	0.0509259
17.8523	0
17.8822	0
17.8822	0.0509259
17.9121	0.0509259
17.9121	0
17.9421	0
17.9421	0.0509259
17.972	0.0509259
17.972	0
18.0019	0
18.0019	0.0231481
18.0313	0.0231481
18.0313	0
18.0606	0
18.0606	0.0231481
18.09	0.0231481
18.09	0
18.1193	0
18.1193	0.0231481
18.1487	0.0231481
18.1487	0
18.178	0
18.178	0.0231481
18.2074	0.0231481
18.2074	0
18.2367	0
18.2367	0.0231481
18.2661	0.0231481
18.2661	0
18.2954	0
18.2954	0.0231481
18.3248	0.0231481
18.3248	0
18.3541	0
18.3541	0.0231481
18.3835	0.0231481
18.3835	0
18.4128	0
18.4128	0.0231481
18.4422	0.0231481
18.4422	0
18.4715	0
18.4715	0.0231481
18.5009	0.0231481
18.5009	0
18.5302	0
18.5302	0.0231481
18.5596	0.0231481
18.5596	0
18.5889	0
18.5889	0.0231481
18.6183	0.0231481
18.6183	0
18.6476	0
18.6476	0.0231481
18.677	0.0231481
18.677	0
18.7063	0
18.7063	0.0231481
18.7357	0.0231481
18.7357	0
18.765	0
18.765	0.0231481
18.7944	0.0231481
18.7944	0
18.8238	0
18.8238	0.0231481
18.8531	0.0231481
18.8531	0
18.8825	0
18.8825	0.0231481
18.9118	0.0231481
18.9118	0
18.9412	0
18.9412	0.0231481
18.9705	0.0231481
18.9705	0
18.9999	0
18.9999	0.0231481
19.0292	0.0231481
19.0292	0
19.0586	0
19.0586	0.0231481
19.0879	0.0231481
19.0879	0
19.1173	0
19.1173	0.0231481
19.1466	0.0231481
19.1466	0
19.176	0
19.176	0.0231481
19.2053	0.0231481
19.2053	0
19.2347	0
19.2347	0.0231481
19.264	0.0231481
19.264	0
19.2934	0
19.2934	0.0231481
19.3227	0.0231481
19.3227	0
19.3521	0
19.3521	0.0231481
19.3814	0.0231481
19.3814	0
19.4108	0
19.4108	0.0231481
19.4401	0.0231481
19.4401	0
19.4695	0
19.4695	0.0231481
19.4988	0.0231481
19.4988	0
19.5282	0
19.5282	0.0231481
19.5575	0.0231481
19.5575	0
19.5869	0
19.5869	0.0231481
19.6162	0.0231481
19.6162	0
19.6456	0
19.6456	0.0231481
19.6749	0.0231481
19.6749	0
19.7043	0
19.7043	0.0231481
19.7336	0.0231481
19.7336	0
19.763	0
19.763	0.0231481
19.7923	0.0231481
19.7923	0
19.8217	0
19.8217	0.0231481
19.851	0.0231481
19.851	0
19.8804	0
19.8804	0.0231481
19.9097	0.0231481
19.9097	0
19.9391	0
19.9391	0.0231481
19.9684	0.0231481
19.9684	0
19.9978	0
19.9978	0.0231481
20.0271	0.0231481
20.0271	0
20.0565	0
20.0565	0.0231481
20.0858	0.0231481
20.0858	0
20.1152	0
20.1152	0.0231481
20.1445	0.0231481
20.1445	0
20.1739	0
20.1739	0.0231481
20.2032	0.0231481
20.2032	0
20.2326	0
20.2326	0.0231481
20.2619	0.0231481
20.2619	0
20.2913	0
20.2913	0.0231481
20.3206	0.0231481
20.3206	0
20.35	0
20.35	0.0231481
20.3793	0.0231481
20.3793	0
20.4087	0
20.4087	0.0231481
20.438	0.0231481
20.438	0
20.4674	0
20.4674	0.0231481
20.4967	0.0231481
20.4967	0
20.5261	0
20.5261	0.0231481
20.5554	0.0231481
20.5554	0
20.5848	0
20.5848	0.0231481
20.6141	0.0231481
20.6141	0
20.6435	0
20.6435	0.0231481
20.6728	0.0231481
20.6728	0
20.7022	0
20.7022	0.0231481
20.7315	0.0231481
20.7315	0
20.7609	0
20.7609	0.0231481
20.7902	0.0231481
20.7902	0
20.8196	0
20.8196	0.0231481
20.8489	0.0231481
20.8489	0
20.8783	0
20.8783	0.0231481
20.9076	0.0231481
20.9076	0
20.937	0
20.937	0.0231481
20.9663	0.0231481
20.9663	0
20.9957	0
20.9957	0.00925926
21.0256	0.00925926
21.0256	0
21.0555	0
21.0555	0.00925926
21.0855	0.00925926
21.0855	0
21.1154	0
21.1154	0.00925926
21.1454	0.00925926
21.1454	0
21.1753	0
21.1753	0.00925926
21.2052	0.00925926
21.2052	0
21.2352	0
21.2352	0.00925926
21.2651	0.00925926
21.2651	0
21.295	0
21.295	0.00925926
21.325	0.00925926
21.325	0
21.3549	0
21.3549	0.00925926
21.3849	0.00925926
21.3849	0
21.4148	0
21.4148	0.00925926
21.4447	0.00925926
21.4447	0
21.4747	0
21.4747	0.00925926
21.5046	0.00925926
21.5046	0
21.5345	0
21.5345	0.00925926
21.5645	0.00925926
21.5645	0
21.5944	0
21.5944	0.00925926
21.6244	0.00925926
21.6244	0
21.6543	0
21.6543	0.00925926
21.6842	0.00925926
21.6842	0
21.7142	0
21.7142	0.00925926
21.7441	0.00925926
21.7441	0
21.774	0
21.774	0.00925926
21.804	0.00925926
21.804	0
21.8339	0
21.8339	0.00925926
21.8638	0.00925926
21.8638	0
21.8938	0
21.8938	0.00925926
21.9237	0.00925926
21.9237	0
21.9537	0
21.9537	0.00925926
21.9836	0.00925926
21.9836	0
22.0135	0
22.0135	0.00925926
22.0435	0.00925926
22.0435	0
22.0734	0
22.0734	0.00925926
22.1033	0.00925926
22.1033	0
22.1333	0
22.1333	0.00925926
22.1632	0.00925926
22.1632	0
22.1932	0
22.1932	0.00925926
22.2231	0.00925926
22.2231	0
22.253	0
22.253	0.00925926
22.283	0.00925926
22.283	0
22.3129	0
22.3129	0.00925926
22.3428	0.00925926
22.3428	0
22.3728	0
22.3728	0.00925926
22.4027	0.00925926
22.4027	0
22.4327	0
22.4327	0.00925926
22.4626	0.00925926
22.4626	0
22.4925	0
22.4925	0.00925926
22.5225	0.00925926
22.5225	0
22.5524	0
22.5524	0.00925926
22.5823	0.00925926
22.5823	0
22.6123	0
22.6123	0.00925926
22.6422	0.00925926
22.6422	0
22.6722	0
22.6722	0.00925926
22.7021	0.00925926
22.7021	0
22.732	0
22.732	0.00925926
22.762	0.00925926
22.762	0
22.7919	0
22.7919	0.00925926
22.8218	0.00925926
22.8218	0
22.8518	0
22.8518	0.00925926
22.8817	0.00925926
22.8817	0
22.9117	0
22.9117	0.00925926
22.9416	0.00925926
22.9416	0
22.9715	0
22.9715	0.00925926
23.0015	0.00925926
23.0015	0
23.0314	0
23.0314	0.00925926
23.0613	0.00925926
23.0613	0
23.0913	0
23.0913	0.00925926
23.1212	0.00925926
23.1212	0
23.1511	0
23.1511	0.00925926
23.1811	0.00925926
23.1811	0
23.211	0
23.211	0.00925926
23.241	0.00925926
23.241	0
23.2709	0
23.2709	0.00925926
23.3008	0.00925926
23.3008	0
23.3308	0
23.3308	0.00925926
23.3607	0.00925926
23.3607	0
23.3906	0
23.3906	0.00925926
23.4206	0.00925926
23.4206	0
23.4505	0
23.4505	0.00925926
23.4805	0.00925926
23.4805	0
23.5104	0
23.5104	0.00925926
23.5403	0.00925926
23.5403	0
23.5703	0
23.5703	0.00925926
23.6002	0.00925926
23.6002	0
23.6301	0
23.6301	0.00925926
23.6601	0.00925926
23.6601	0
23.69	0
23.69	0.00925926
23.72	0.00925926
23.72	0
23.7499	0
23.7499	0.00925926
23.7798	0.00925926
23.7798	0
23.8098	0
23.8098	0.00925926
23.8397	0.00925926
23.8397	0
23.8696	0
23.8696	0.00925926
23.8996	0.00925926
23.8996	0
23.9295	0
23.9295	0.00925926
23.9595	0.00925926
23.9595	0
23.9894	0
23.9894	0.0185185
24.0187	0.0185185
24.0187	0
24.0481	0
24.0481	0.0185185
24.0774	0.0185185
24.0774	0
24.1068	0
24.1068	0.0185185
24.1361	0.0185185
24.1361	0
24.1655	0
24.1655	0.0185185
24.1948	0.0185185
24.1948	0
24.2242	0
24.2242	0.0185185
24.2535	0.0185185
24.2535	0
24.2829	0
24.2829	0.0185185
24.3122	0.0185185
24.3122	0
24.3416	0
24.3416	0.0185185
24.3709	0.0185185
24.3709	0
24.4003	0
24.4003	0.0185185
24.4296	0.0185185
24.4296	0
24.459	0
24.459	0.0185185
24.4883	0.0185185
24.4883	0
24.5177	0
24.5177	0.0185185
24.547	0.0185185
24.547	0
24.5764	0
24.5764	0.0185185
24.6057	0.0185185
24.6057	0
24.6351	0
24.6351	0.0185185
24.6644	0.0185185
24.6644	0
24.6938	0
24.6938	0.0185185
24.7231	0.0185185
24.7231	0
24.7525	0
24.7525	0.0185185
24.7818	0.0185185
24.7818	0
24.8112	0
24.8112	0.0185185
24.8405	0.0185185
24.8405	0
24.8699	0
24.8699	0.0185185
24.8992	0.0185185
24.8992	0
24.9286	0
24.9286	0.0185185
24.958	0.0185185
24.958	0
24.9873	0
24.9873	0.0185185
25.0167	0.0185185
25.0167	0
25.046	0
25.046	0.0185185
25.0754	0.0185185
25.0754	0
25.1047	0
25.1047	0.0185185
25.1341	0.0185185
25.1341	0
25.1634	0
25.1634	0.0185185
25.1928	0.0185185
25.1928	0
25.2221	0
25.2221	0.0185185
25.2515	0.0185185
25.2515	0
25.2808	0
25.2808	0.0185185
25.3102	0.0185185
25.3102	0
25.3395	0
25.3395	0.0185185
25.3689	0.0185185
25.3689	0
25.3982	0
25.3982	0.0185185
25.4276	0.0185185
25.4276	0
25.4569	0
25.4569	0.0185185
25.4863	0.0185185
25.4863	0
25.5156	0
25.5156	0.0185185
25.545	0.0185185
25.545	0
25.5743	0
25.5743	0.0185185
25.6037	0.0185185
25.6037	0
25.633	0
25.633	0.0185185
25.6624	0.0185185
25.6624	0
25.6917	0
25.6917	0.0185185
25.7211	0.0185185
25.7211	0
25.7504	0
25.7504	0.0185185
25.7798	0.0185185
25.7798	0
25.8091	0
25.8091	0.0185185
25.8385	0.0185185
25.8385	0
25.8678	0
25.8678	0.0185185
25.8972	0.0185185
25.8972	0
25.9265	0
25.9265	0.0185185
25.9559	0.0185185
25.9559	0
25.9852	0
25.9852	0.0185185
26.0146	0.0185185
26.0146	0
26.0439	0
26.0439	0.0185185
26.0733	0.0185185
26.0733	0
26.1026	0
26.1026	0.0185185
26.132	0.0185185
26.132	0
26.1613	0
26.1613	0.0185185
26.1907	0.0185185
26.1907	0
26.22	0
26.22	0.0185185
26.2494	0.0185185
26.2494	0
26.2787	0
26.2787	0.0185185
26.3081	0.0185185
26.3081	0
26.3374	0
26.3374	0.0185185
26.3668	0.0185185
26.3668	0
26.3961	0
26.3961	0.0185185
26.4255	0.0185185
26.4255	0
26.4548	0
26.4548	0.0185185
26.4842	0.0185185
26.4842	0
26.5135	0
26.5135	0.0185185
26.5429	0.0185185
26.5429	0
26.5722	0
26.5722	0.0185185
26.6016	0.0185185
26.6016	0
26.6309	0
26.6309	0.0185185
26.6603	0.0185185
26.6603	0
26.6896	0
26.6896	0.0185185
26.719	0.0185185
26.719	0
26.7483	0
26.7483	0.0185185
26.7777	0.0185185
26.7777	0
26.807	0
26.807	0.0185185
26.8364	0.0185185
26.8364	0
26.8657	0
26.8657	0.0185185
26.8951	0.0185185
26.8951	0
26.9244	0
26.9244	0.0185185
26.9538	0.0185185
26.9538	0
26.9831	0
26.9831	0.00462963
27.0131	0.00462963
27.0131	0
27.043	0
27.043	0.00462963
27.0729	0.00462963
27.0729	0
27.1029	0
27.1029	0.00462963
27.1328	0.00462963
27.1328	0
27.1627	0
27.1627	0.00462963
27.1927	0.00462963
27.1927	0
27.2226	0
27.2226	0.00462963
27.2526	0.00462963
27.2526	0
27.2825	0
27.2825	0.00462963
27.3124	0.00462963
27.3124	0
27.3424	0
27.3424	0.00462963
27.3723	0.00462963
27.3723	0
27.4022	0
27.4022	0.00462963
27.4322	0.00462963
27.4322	0
27.4621	0
27.4621	0.00462963
27.492	0.00462963
27.492	0
27.522	0
27.522	0.00462963
27.5519	0.00462963
27.5519	0
27.5819	0
27.5819	0.00462963
27.6118	0.00462963
27.6118	0
27.6417	0
27.6417	0.00462963
27.6717	0.00462963
27.6717	0
27.7016	0
27.7016	0.00462963
27.7315	0.00462963
27.7315	0
27.7615	0
27.7615	0.00462963
27.7914	0.00462963
27.7914	0
27.8214	0
27.8214	0.00462963
27.8513	0.00462963
27.8513	0
27.8812	0
27.8812	0.00462963
27.9112	0.00462963
27.9112	0
27.9411	0
27.9411	0.00462963
27.971	0.00462963
27.971	0
28.001	0
28.001	0.00462963
28.0309	0.00462963
28.0309	0
28.0609	0
28.0609	0.00462963
28.0908	0.00462963
28.0908	0
28.1207	0
28.1207	0.00462963
28.1507	0.00462963
28.1507	0
28.1806	0
28.1806	0.00462963
28.2105	0.00462963
28.2105	0
28.2405	0
28.2405	0.00462963
28.2704	0.00462963
28.2704	0
28.3004	0
28.3004	0.00462963
28.3303	0.00462963
28.3303	0
28.3602	0
28.3602	0.00462963
28.3902	0.00462963
28.3902	0
28.4201	0
28.4201	0.00462963
28.45	0.00462963
28.45	0
28.48	0
28.48	0.00462963
28.5099	0.00462963
28.5099	0
28.5399	0
28.5399	0.00462963
28.5698	0.00462963
28.5698	0
28.5997	0
28.5997	0.00462963
28.6297	0.00462963
28.6297	0
28.6596	0
28.6596	0.00462963
28.6895	0.00462963
28.6895	0
28.7195	0
28.7195	0.00462963
28.7494	0.00462963
28.7494	0
28.7794	0
28.7794	0.00462963
28.8093	0.00462963
28.8093	0
28.8392	0
28.8392	0.00462963
28.8692	0.00462963
28.8692	0
28.8991	0
28.8991	0.00462963
28.929	0.00462963
28.929	0
28.959	0
28.959	0.00462963
28.9889	0.00462963
28.9889	0
29.0188	0
29.0188	0.00462963
29.0488	0.00462963
29.0488	0
29.0787	0
29.0787	0.00462963
29.1087	0.00462963
29.1087	0
29.1386	0
29.1386	0.00462963
29.1685	0.00462963
29.1685	0
29.1985	0
29.1985	0.00462963
29.2284	0.00462963
29.2284	0
29.2583	0
29.2583	0.00462963
29.2883	0.00462963
29.2883	0
29.3182	0
29.3182	0.00462963
29.3482	0.00462963
29.3482	0
29.3781	0
29.3781	0.00462963
29.408	0.00462963
29.408	0
29.438	0
29.438	0.00462963
29.4679	0.00462963
29.4679	0
29.4978	0
29.4978	0.00462963
29.5278	0.00462963
29.5278	0
29.5577	0
29.5577	0.00462963
29.5877	0.00462963
29.5877	0
[truncated: 832 more rows]
